# Supplementary material for: Transcriptome and Evolutionary Analysis of Pseudotrichomonas keilini, a Free-Living Anaerobic Eukaryote
Source: PubMed Central journal article supplement — Genome Biol Evol. 2024 Dec 4;16(12):evae262. doi: 10.1093/gbe/evae262 (PMC11635102; doi:10.1093/gbe/evae262), 2024-12-04
Supplement: evae262_supplementary_data.pdf [file evae262_supplementary_data.pdf]

# Supplementary Material for “Transcriptome and evolutionary analysis of *Pseudotrichomonas keilini*, a free-living anaerobic eukaryote”

## Supplementary Methods

### *Strain isolation and culture*

*Pseudotrichomonas keilini* strain TOLEDOT was isolated from salt marsh sediment at Toledo, Castile-La Mancha, Spain, coordinates 39°58'42"N, 3°39'20"W. It was maintained as a mono-eukaryotic, polyxenic culture in Dobell-Laidlaw biphasic (Dobell & Laidlaw, 1926) medium at room temperature and subcultured every two weeks. Living and protargol-stained cells of *P. keilini* were examined under a microscope 1200 BX51 (Olympus) equipped with an Olympus DP71 camera, using DIC optics for living cells. Protargol-stained preparations were prepared as follows: moist films spread on coverslips were prepared from pelleted cultures obtained by centrifugation at 500 g for 8 minutes. The films were fixed in Bouin-Hollande's fluid for approximately 15 hours, washed with 70% ethanol, and stained with 1% protargol (Bayer, I. G. Farbenindustrie) following (Nie, 1950) protocol. Micrographs of protargol-stained cells exhibiting the morphological characteristics of *P. keilini* are given in Supplementary Figure 1.

### *Transcriptome sequencing and assembly*

For transcriptome sequencing, RNA was extracted from 8 mL *P. keilini* culture using Trizol reagent (Invitrogen) and cDNA was synthesised using the SmartSeq2 protocol (Picelli et al. 2014) using poly-dT primers for first strand synthesis to enrich for eukaryotic transcripts and a template-switching oligo to enable sequencing of the 5' end of each transcript. Libraries were built at the ASU genomics core using KAPA Biosystem's LTP library preparation kit (KK8232). Library fragment size was analysed by TapeStation (Agilent), and quantified by qPCR (KAPA Library Quantification Kit, KK4835) on Thermo Fisher Scientific's Quantstudio 5 before sequencing on an Illumina MiSeq V2 using 2x250 paired end chemistry. Additional transcriptome sequencing from another 8 mL *P. keilini* culture was carried out at Génome Québec using the NEB stranded mRNA library protocol (New England Biolabs) for cDNA synthesis and library preparation before sequencing 50 million reads on the NovaSeq6000 platform using 2x100 chemistry. Transcript reads were assembled using Trinity RNA-Seq v2.8.4 (Haas et al., 2013). Predicted proteins that were 100% identical over the overlapping length were clustered using CD-HIT 4.8.1 (Li and Godzik, 2006). Reads have been deposited in the NCBI Short Read Archive under the accession PRJNA884676.

### *Gene finding and annotation*

Protein prediction from transcripts was done using TransDecoder version 5.5.0 (Haas et al., 2013). Using default parameters, we obtained a total of 83,266 proteins from the total set of assembled transcripts. As we were unable to obtain a pure culture of *P. keilini*, we applied a

conservative BLAST-based filter to these proteins to distinguish bona fide *P. keilini* proteins from prokaryotic contaminants of the assembly. To do so, we searched the predicted proteins against a custom database containing protein sets from 38 published genomes of excavates, along with a representative sampling of 73 other eukaryotes, 148 bacteria and 146 archaea (see Supplementary Table S1). Proteins for which either (i) the best hit was from a parabasalid relative of *P. keilini*, or (ii) alternatively where the first three database hits were eukaryotic in a Diamond BLAST search were retained as putative *P. keilini* proteins. We assigned functions to the filtered *P. keilini* protein set using eggNOG-mapper v2, which uses precomputed protein families from the eggNOG database (Huerta-Cepas et al., 2016, 2017, 2019) to perform functional annotation. For proteins which could not be annotated with eggNOG, we used blastKOALA to predict functions from the KEGG database (Kanehisa et al., 2016, 2017; Kanehisa & Goto, 2000).

### *Phylogenetics*

The species tree was inferred using SpeciesRax (Morel et al., 2022), based on 13,346 gene family trees clustered from 43 eukaryotic genomes using Broccoli v1.2 (Derelle et al., 2020). The branch lengths represent substitutions per site. The individual gene family trees were inferred using IQ-TREE2 (Minh et al., 2020), with 1000 rapid bootstraps, and the best-fitting model in each case (including LG+C20 and LG+C60 as potential site-heterogeneous options), was chosen by the Bayesian Information Criterion. The phylogenetic birth-death model was fit in Count following the procedure suggested in the user manual (Csűös, 2010); the final model included three categories to model variation in branch-specific lengths and duplication rates across the species tree.

### *Hydrogenosome detection*

We used the supplementary table in (Stairs et al., 2015) which included key enzymes of each of the five classes of mitochondria and its related organelles classified by Muller et al. (2012). Using Diamond (Buchfink et al., 2015), we did a BLAST search for the sequences against the database of *P. keilini* filtered proteins to identify key enzymes. Other protein sequences were added for these enzymes by doing a BLAST search against the NCBI nr database and selecting the top five hits from eukaryotes, alphaproteobacteria, and other bacteria. The retrieved sequences were then aligned using MAFFT v7.390 (Kato & Standley, 2013). After checking the alignment, and selecting the most complete sequences, we then ran BMGE-1.12 (Crisuolo & Gribaldo, 2010) which trims the multiple sequence alignment to remove poorly aligned regions. The trimmed alignments were used to construct maximum-likelihood trees with IQ-TREE-v1.6.10 using the best model selected by ModelFinder (Kalyaanamoorthy et al., 2017; Nguyen et al., 2015). Finally, we used HMMER 3.2.1 (<http://hmmer.org/>) to search the filtered *P. keilini* transcriptome for homologues of mitochondrial carrier family transport proteins, with an E-value threshold of  $< 10^{-5}$ . We used the PF00153 HMM profile for the MCF mitochondrial carrier protein which contains 125,808 sequences from 1,117 species including *Trichomonas vaginalis*. HMMER profiles are probabilistic profile hidden Markov models (Durbin et al., 1998; Eddy, 1998; Krogh et al., 1994) which are used to identify distant protein homologs.

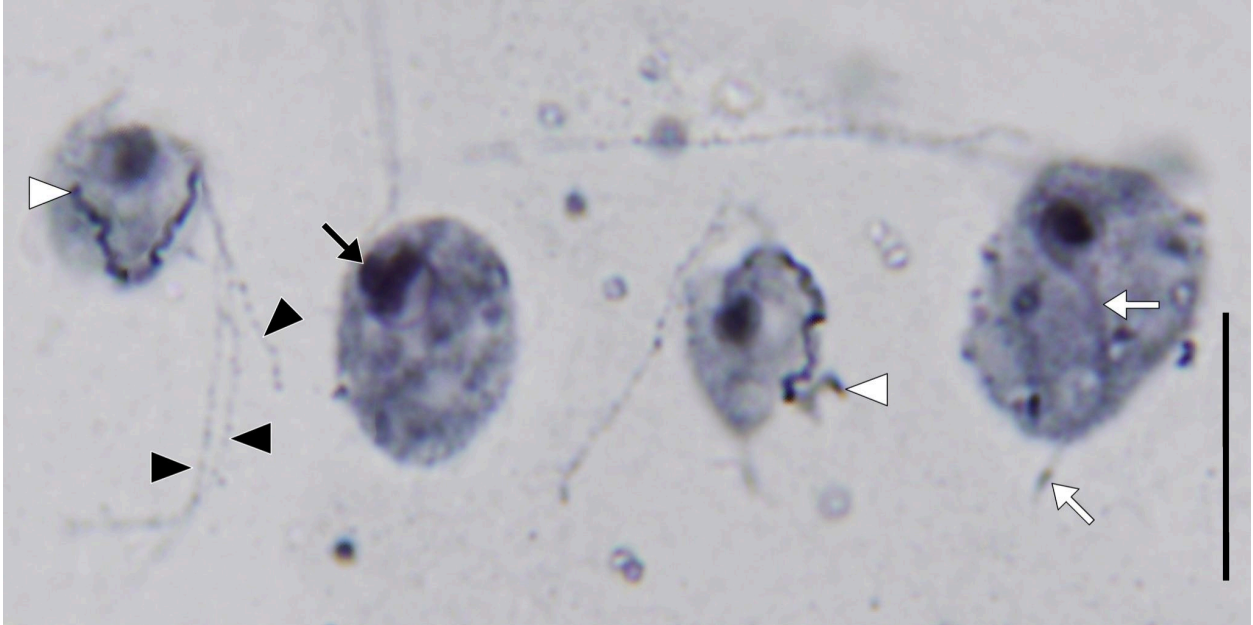

**Figure S1. Morphology of *Pseudotrichomonas keilini*.** Protargol-stained cells exhibit the diagnostic characters of this species: three anterior flagella (black arrowheads), a well developed undulating membrane that does not continue as a free flagellum (white arrowheads), a large parabasal body (this differentiates the organism from *Lacusteria*; black arrow), and a normally developed axostyle (white arrows), scale 10  $\mu$ m.

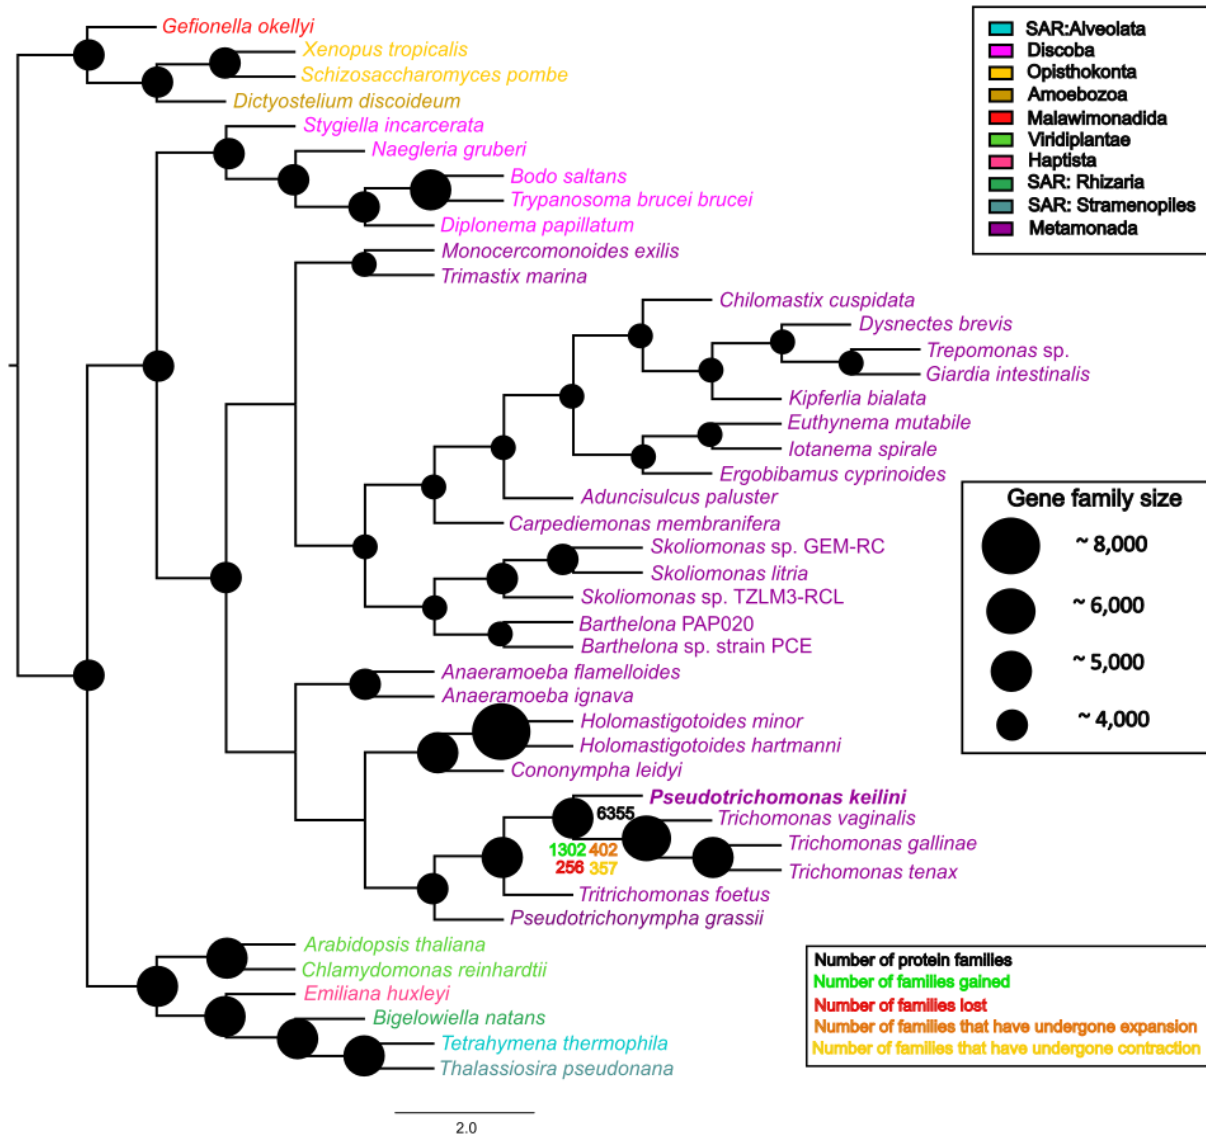

**Figure S2: Gene family evolution in parabasalids and metamonads.** We used a phylogenetic birth-death model implemented in Count ((Csűös, 2010) 2010) to map gene family evolution onto a species tree manually edited to reflect the consensus view of deep eukaryotic relationships. Numbers, and the diameter of circles, indicate gene family repertoire size at ancestral nodes, while family gains, losses, expansions and contractions are plotted for the *Trichomonas* lineage after its divergence from *P. keilini*.

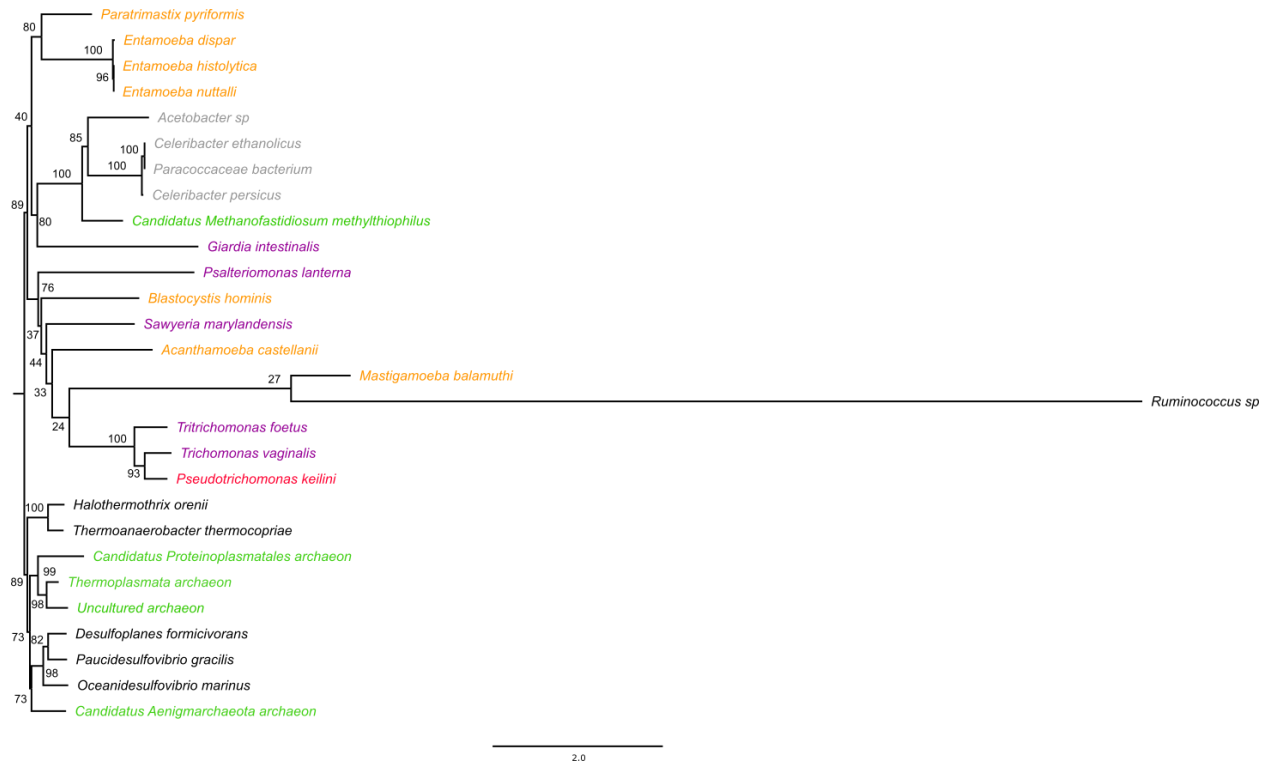

**Figure S3: Phylogeny of Pyruvate:ferredoxin oxidoreductase (PFO).** PFO is a key hydrogenosomal enzyme that catalyzes the interconversion of pyruvate to Acetyl-CoA. Most sampled excavate sequences including *Psalteriomonas lanterna* and *Sawyeria marylandensis* form a clade with the parabasalids *P. keilini*, *Trichomonas vaginalis*, and *Tritrichomonas foetus*. The maximum likelihood gene tree was inferred using IQ-TREE. Branch supports are ultrafast bootstrap values, and branch lengths are proportional to the expected number of substitutions per site, as indicated by the scale bar.

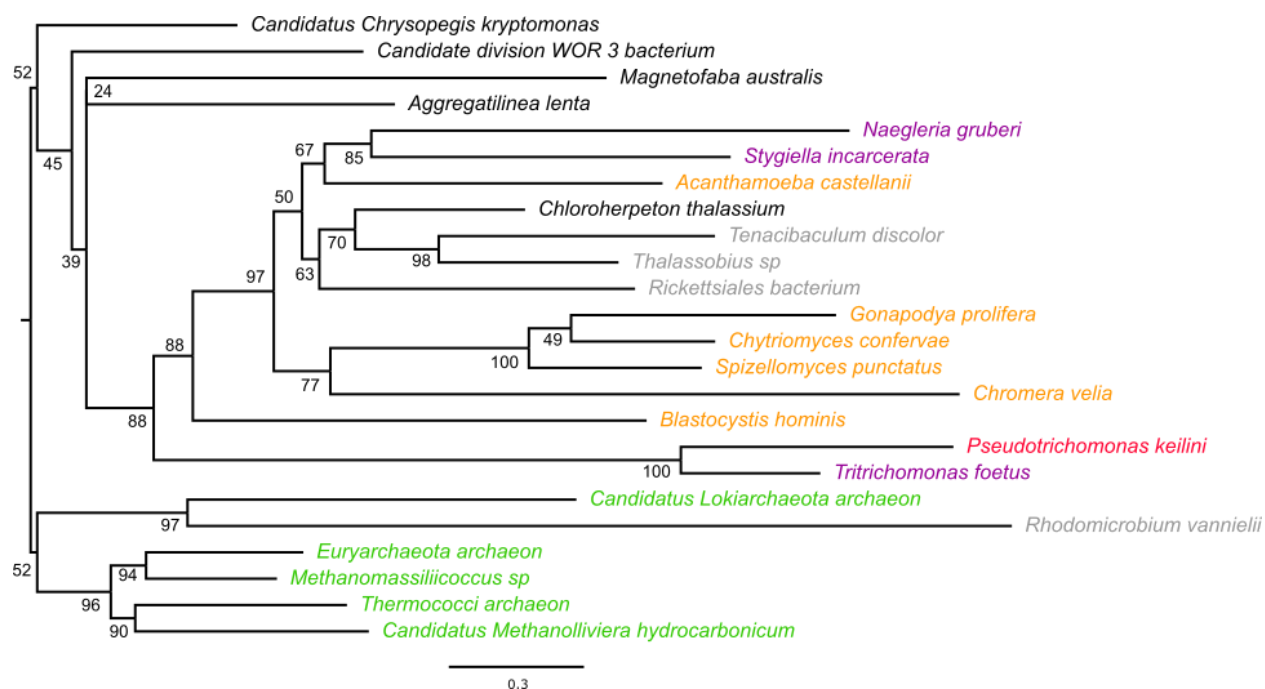

**Figure S4: Phylogenetic analysis of Acetyl:succinate CoA-transferase subunit b (ASCT1b)** which is a bidirectional enzyme that acts on the conversion of succinate to acetyl-CoA and vice versa. In the tree, *P. keilini* groups with *Tritrichomonas foetus* and they both form part of a larger clade which includes other eukaryotes, some of which are excavates. The maximum likelihood gene tree was inferred using IQ-TREE. Branch supports are ultrafast bootstrap values, and branch lengths are proportional to the expected number of substitutions per site, as indicated by the scale bar.

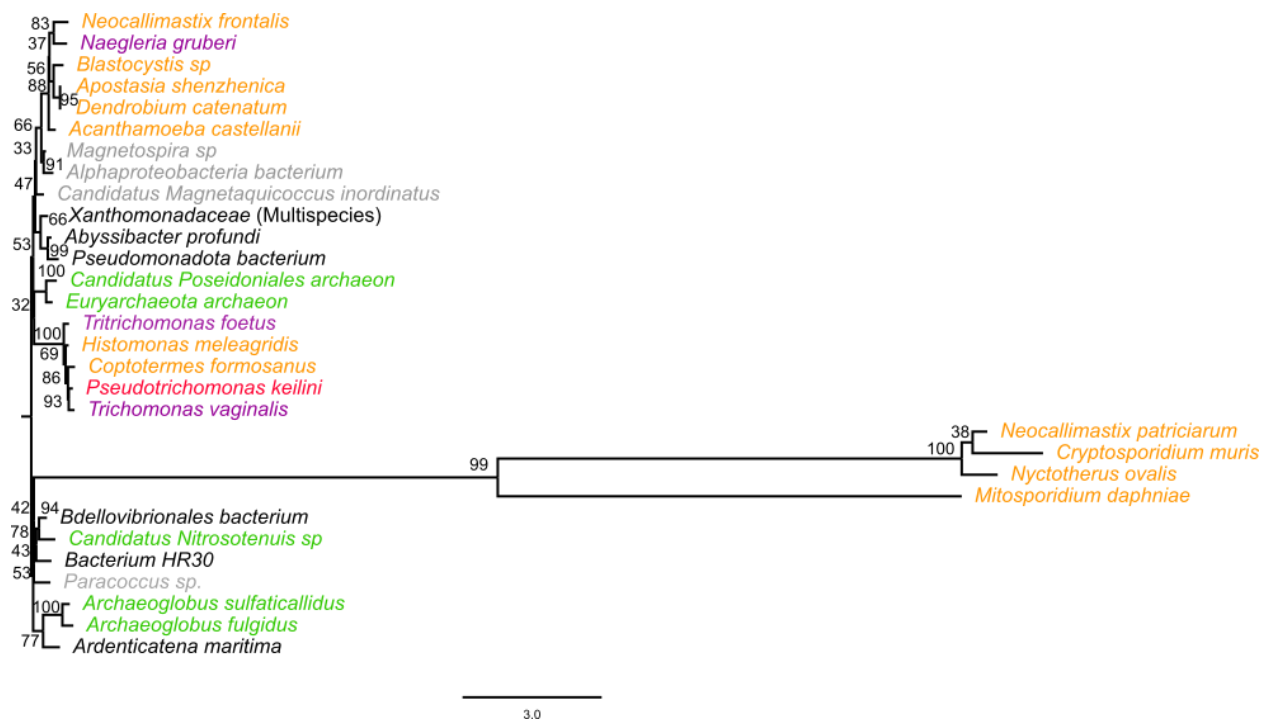

**Figure S5: Phylogenetic analysis of Succinyl coenzyme A synthetase (SCS)** which is a Krebs cycle enzyme that catalyzes the interconversion of succinyl-CoA to succinate. *Tritrichomonas foetus*, *Trichomonas vaginalis*, and *P. keilini*, but not the eukaryotes as a whole, form a clade. The maximum likelihood gene tree was inferred using IQ-TREE. Branch supports are ultrafast bootstrap values, and branch lengths are proportional to the expected number of substitutions per site, as indicated by the scale bar.

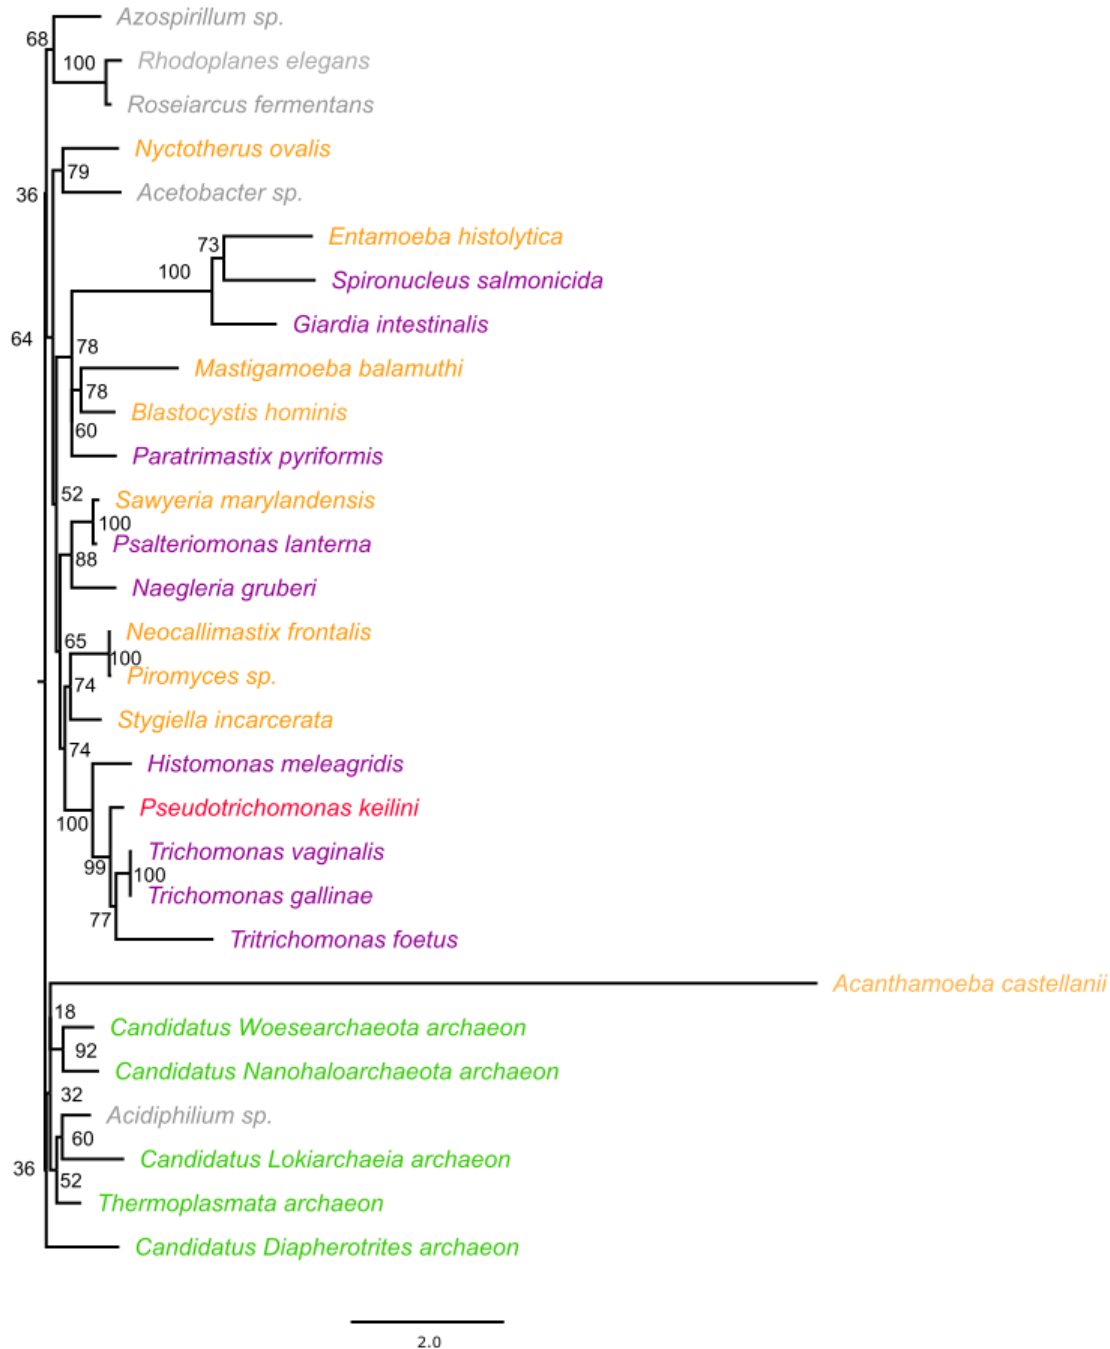

**Figure S6: Phylogeny of Fe-Fe hydrogenase (hydA) enzyme** which is responsible for the production of molecular hydrogen and one of the key hydrogenosomal enzymes. Another sequence from the excavate *Histomonas meleagridis* groups with the parabasalian clade of *P. keilini*, *Trichomonas vaginalis*, and *Tritrichomonas foetus*, *Trichomonas sp* and *Trichomonas gallinae*. The maximum likelihood gene tree was inferred using IQ-TREE. Branch supports are ultrafast bootstrap values, and branch lengths are proportional to the expected number of substitutions per site, as indicated by the scale bar.



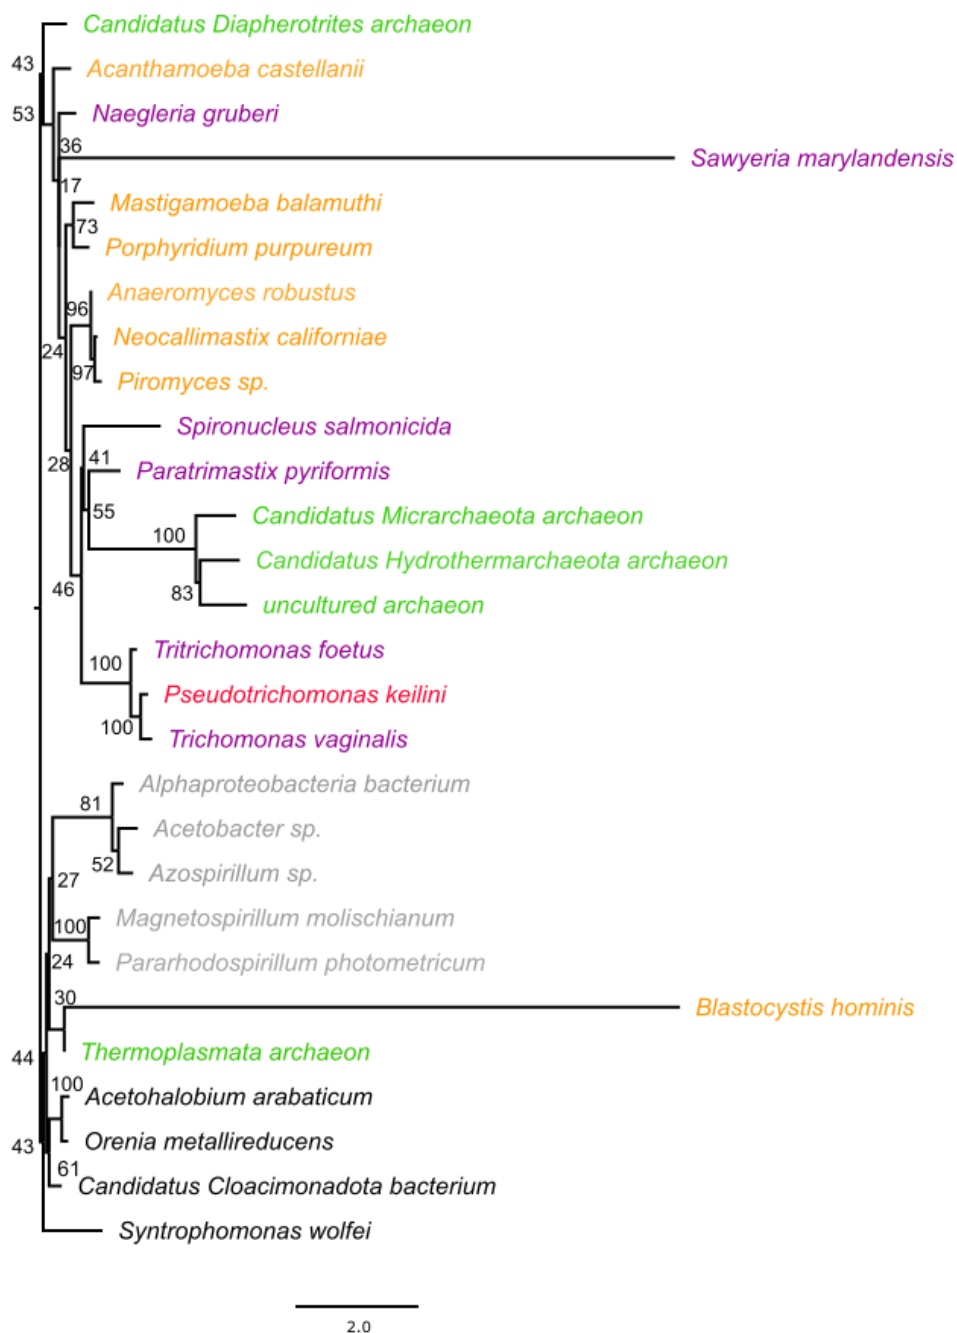

**Figure S7: Phylogeny of radical SAM domain containing protein (hydE),** one of the three maturase enzymes required for the synthesis of a mature Fe-Fe-hydrogenase(hydA). In this tree, the three parabasalids of *P. keilini*, *Trichomonas vaginalis*, and *Tritrichomonas foetus* group together. The maximum likelihood gene tree was inferred using IQ-TREE. Branch supports are ultrafast bootstrap values, and branch lengths are proportional to the expected number of substitutions per site, as indicated by the scale bar.

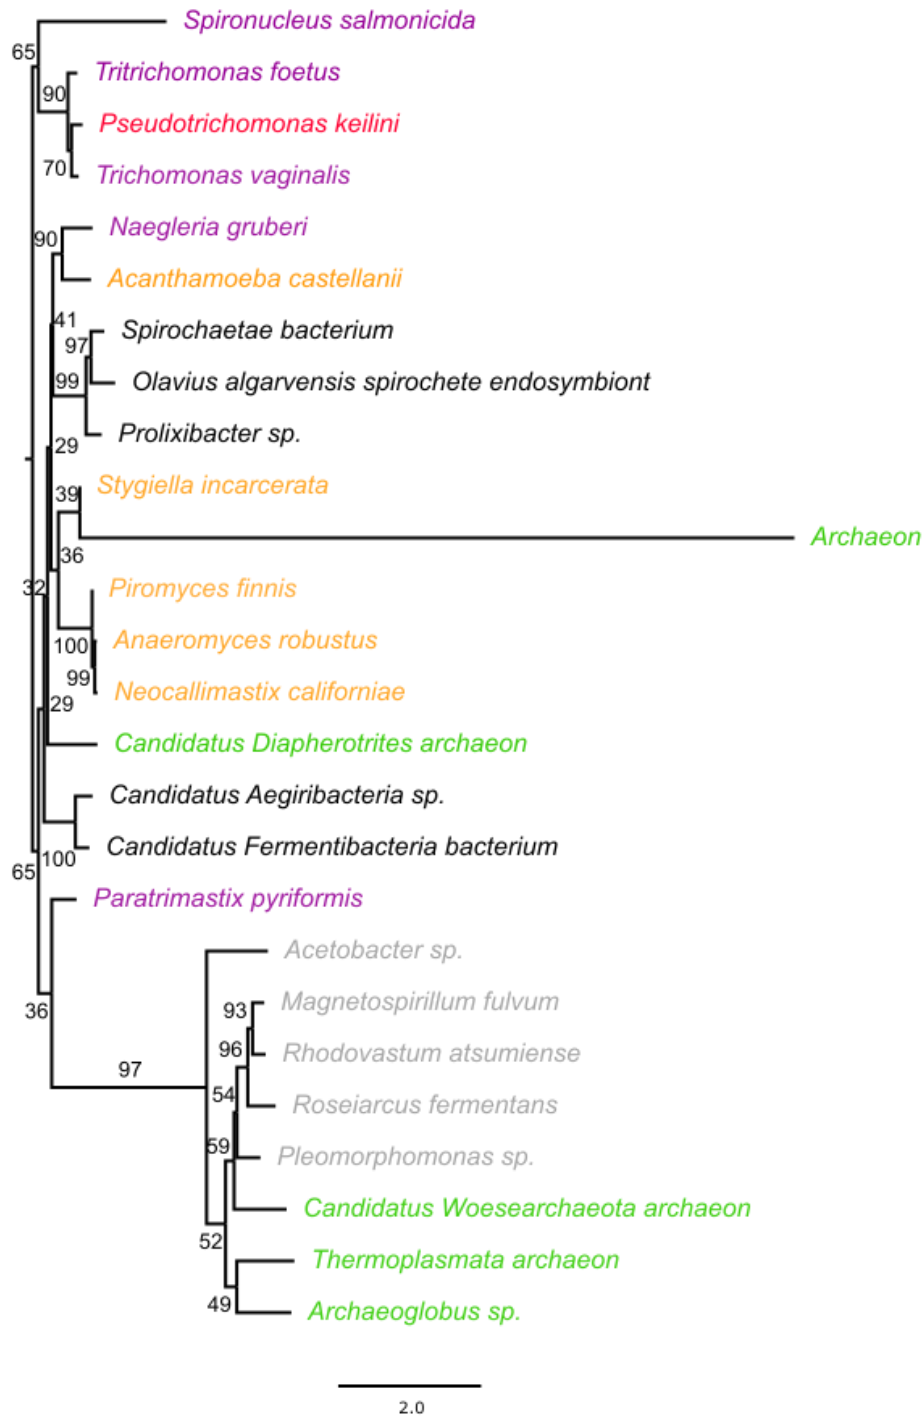

**Figure S8: Phylogeny of small GTP-binding protein (hydF)**, another one of the three maturase enzymes required for the synthesis of a mature Fe-Fe-hydrogenase(hydA). In this tree, the three parabasalids of *P. keilini*, *Trichomonas vaginalis*, and *Tritrichomonas foetus* group together. The maximum likelihood gene tree was inferred using IQ-TREE. Branch supports are

ultrafast bootstrap values, and branch lengths are proportional to the expected number of substitutions per site, as indicated by the scale bar.

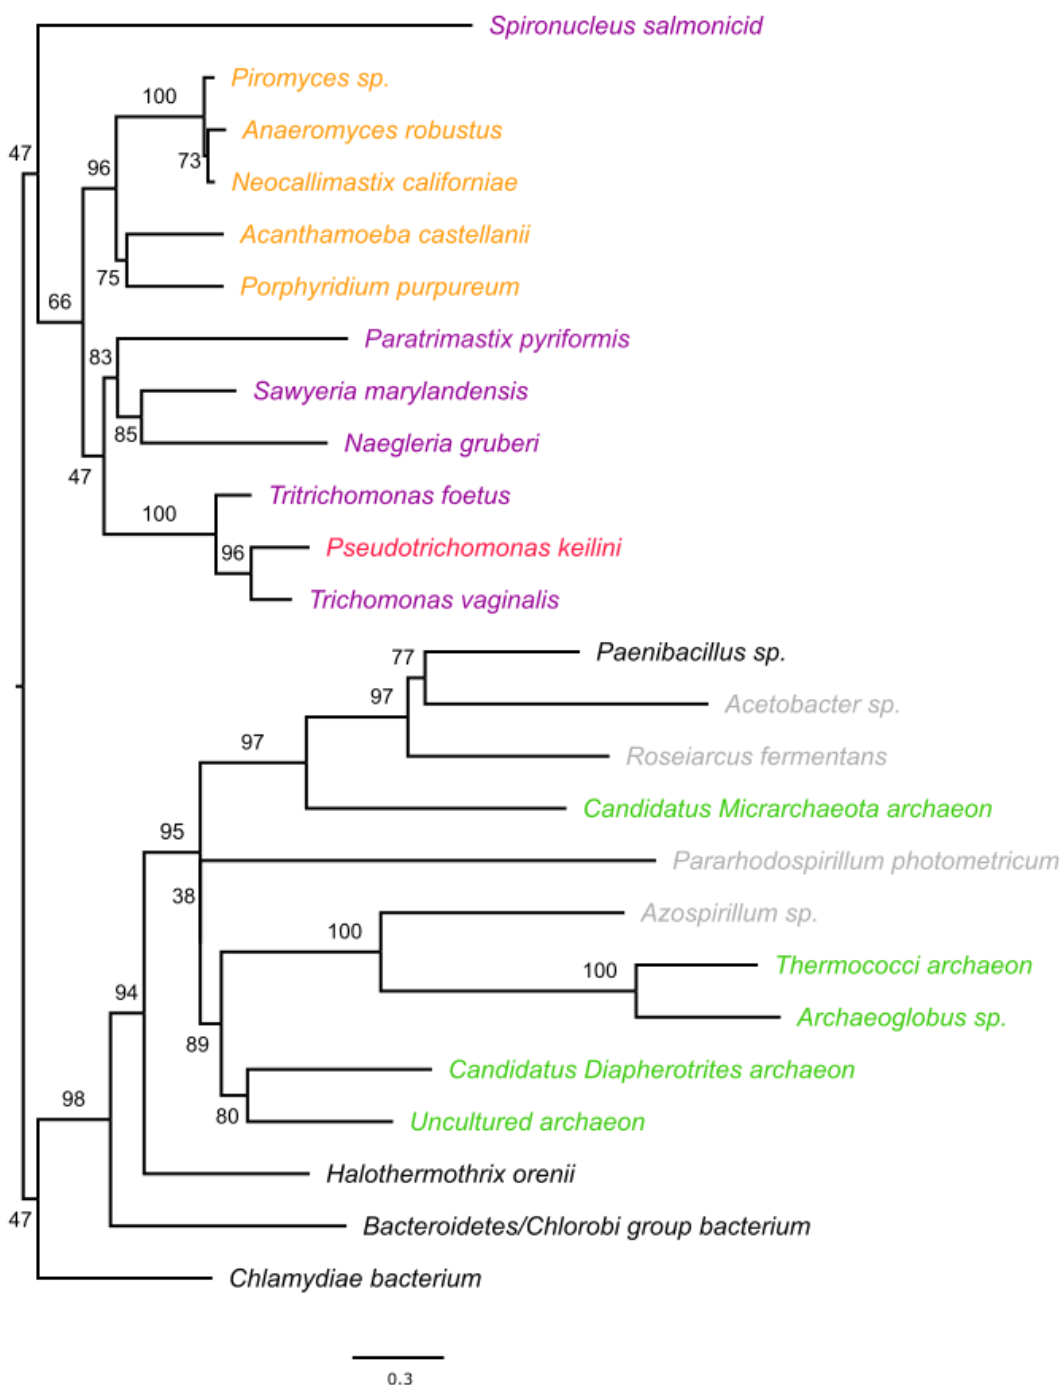

**Figure S9: Phylogeny of FeFe-hydrogenase assembly protein (hydG),** the third maturase enzyme required for the synthesis of a mature Fe-Fe-hydrogenase (hydA). A clade of the three parabasalids *P. keilini*, *Trichomonas vaginalis*, and *Tritrichomonas foetus* can be seen which is

part of a bigger clade of eukaryotes including excavates. The maximum likelihood gene tree was inferred using IQ-TREE. Branch supports are ultrafast bootstrap values, and branch lengths are proportional to the expected number of substitutions per site, as indicated by the scale bar.

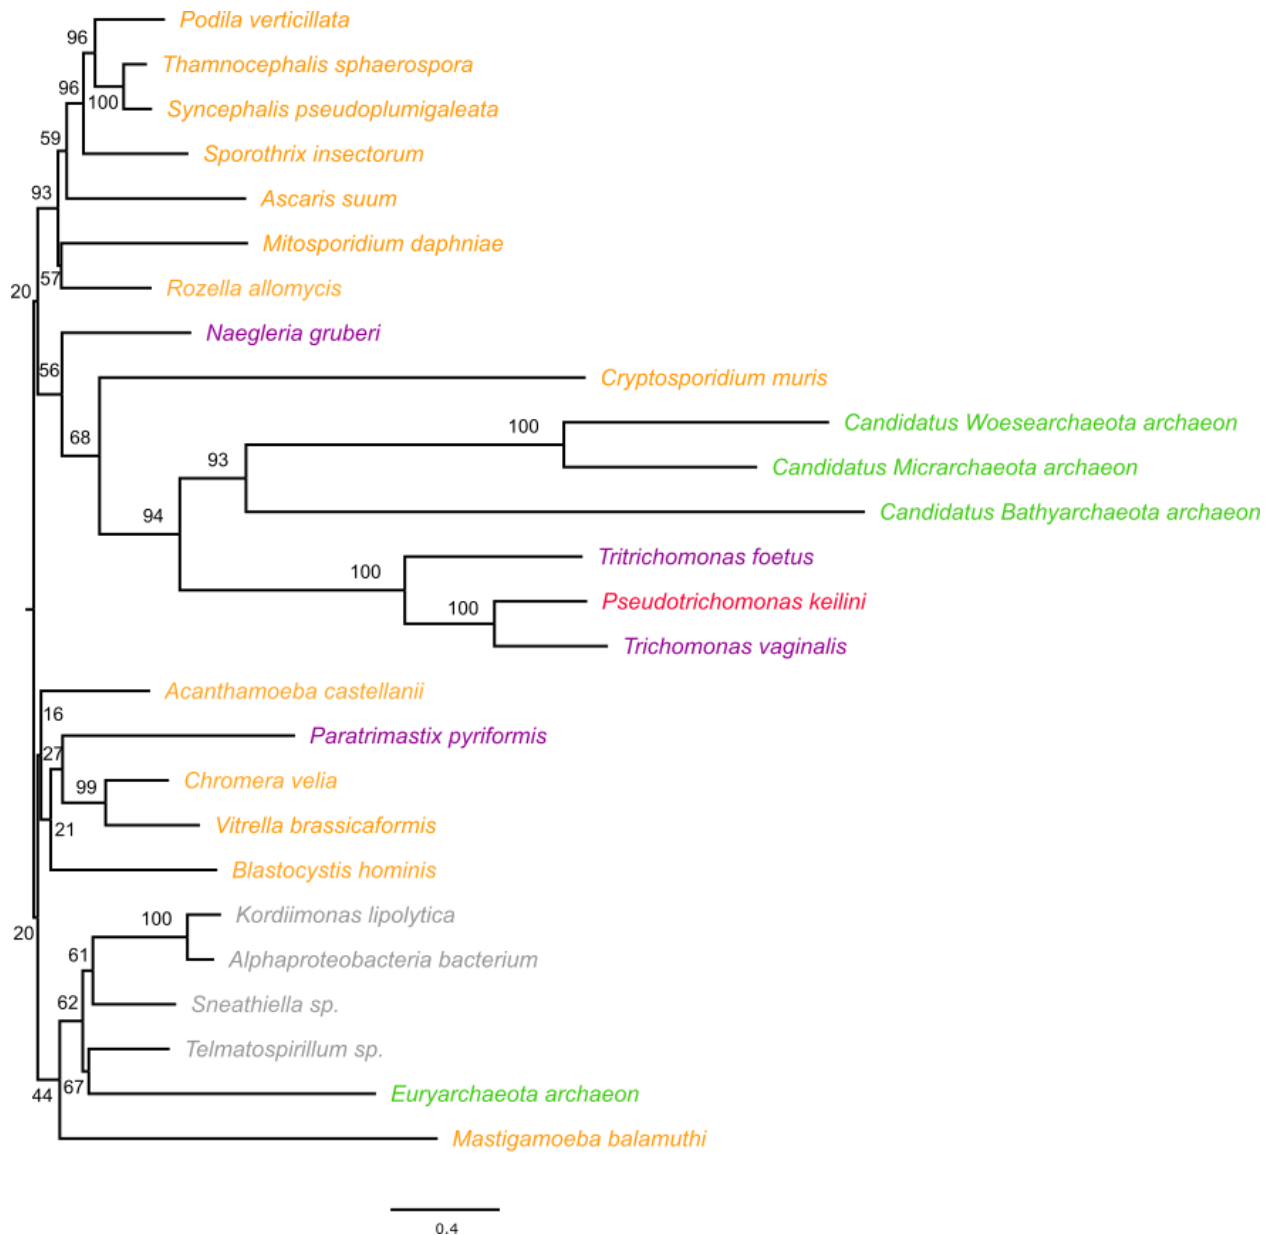

**Figure S10: Phylogeny of L-protein (GCSL),** which is part of the glycine cleavage system. The tree topology shows a clade of parabasalids consisting of *P. keilini*, *Trichomonas vaginalis*, and *Tritrichomonas foetus*, while other eukaryotic sequences form a separate clade. The

maximum likelihood gene tree was inferred using IQ-TREE. Branch supports are ultrafast bootstrap values, and branch lengths are proportional to the expected number of substitutions per site, as indicated by the scale bar.

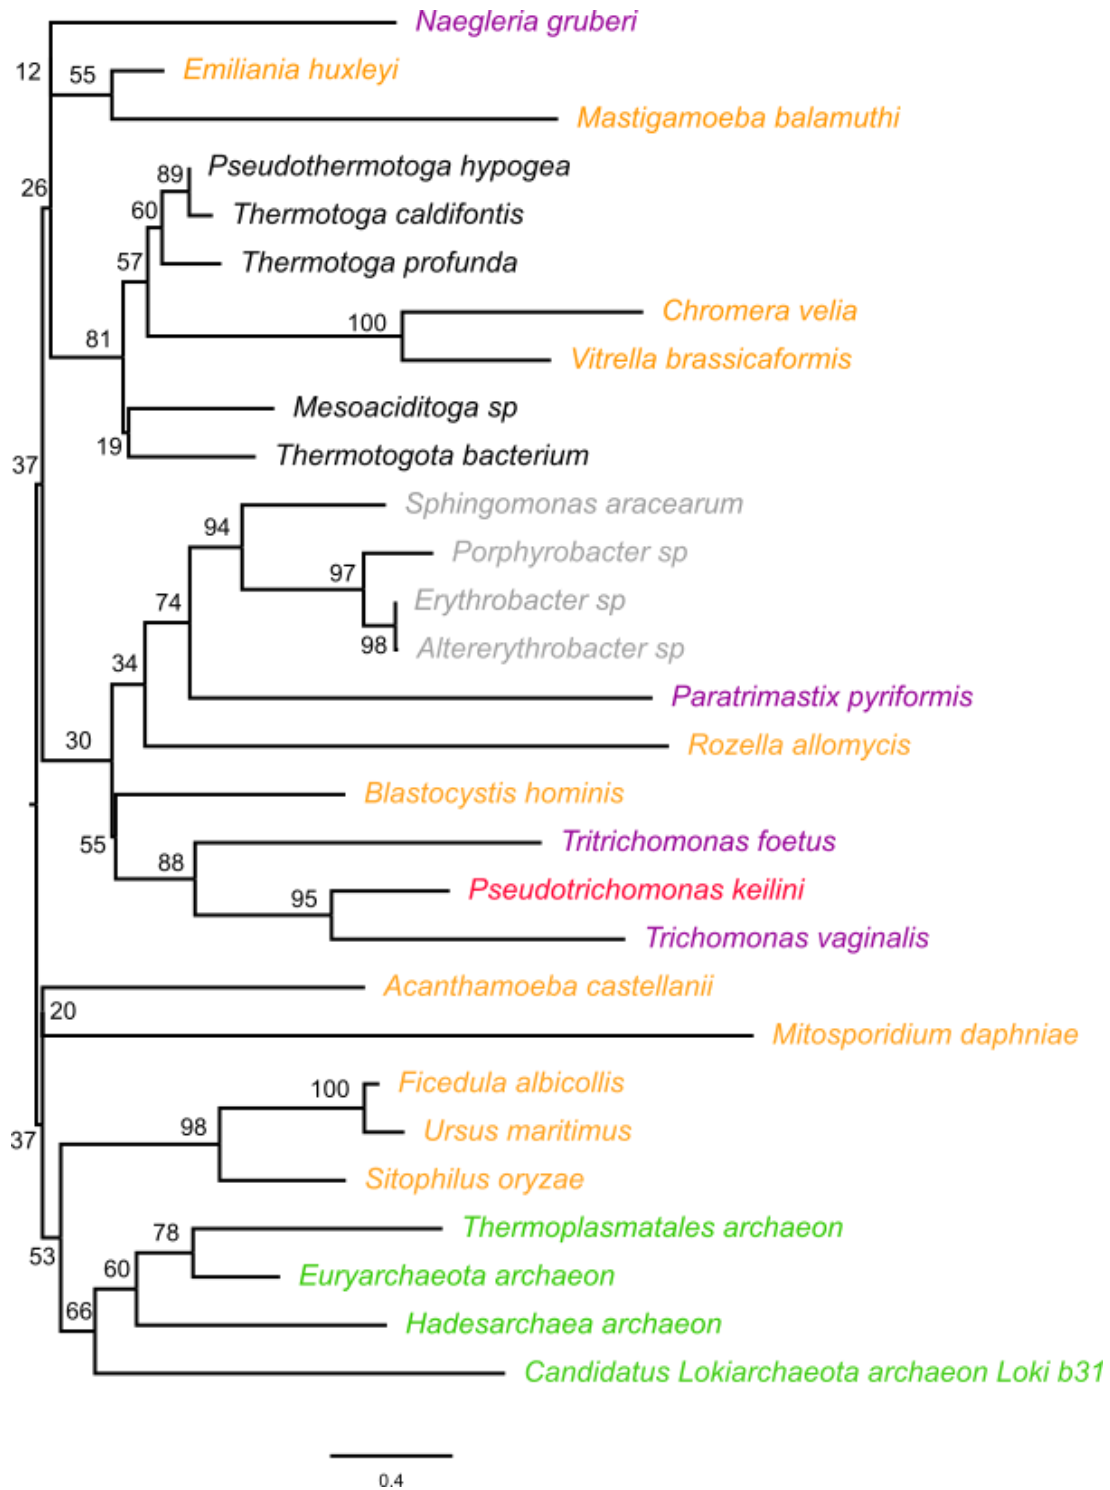

**Figure S11: Phylogeny of H-protein (GCSH)**, the second enzyme detected in *P. keilini*'s glycine cleavage system. The tree contains a clade of parabasalids including *P. keilini*, *Trichomonas vaginalis*, and *Tritrichomonas foetus* that is part of a larger clade comprising other eukaryotic and some alphaproteobacterial sequences, which could indicate an alphaproteobacterial origin of the enzyme. The maximum likelihood gene tree was inferred using IQ-TREE. Branch supports are ultrafast bootstrap values, and branch lengths are proportional to the expected number of substitutions per site, as indicated by the scale bar.

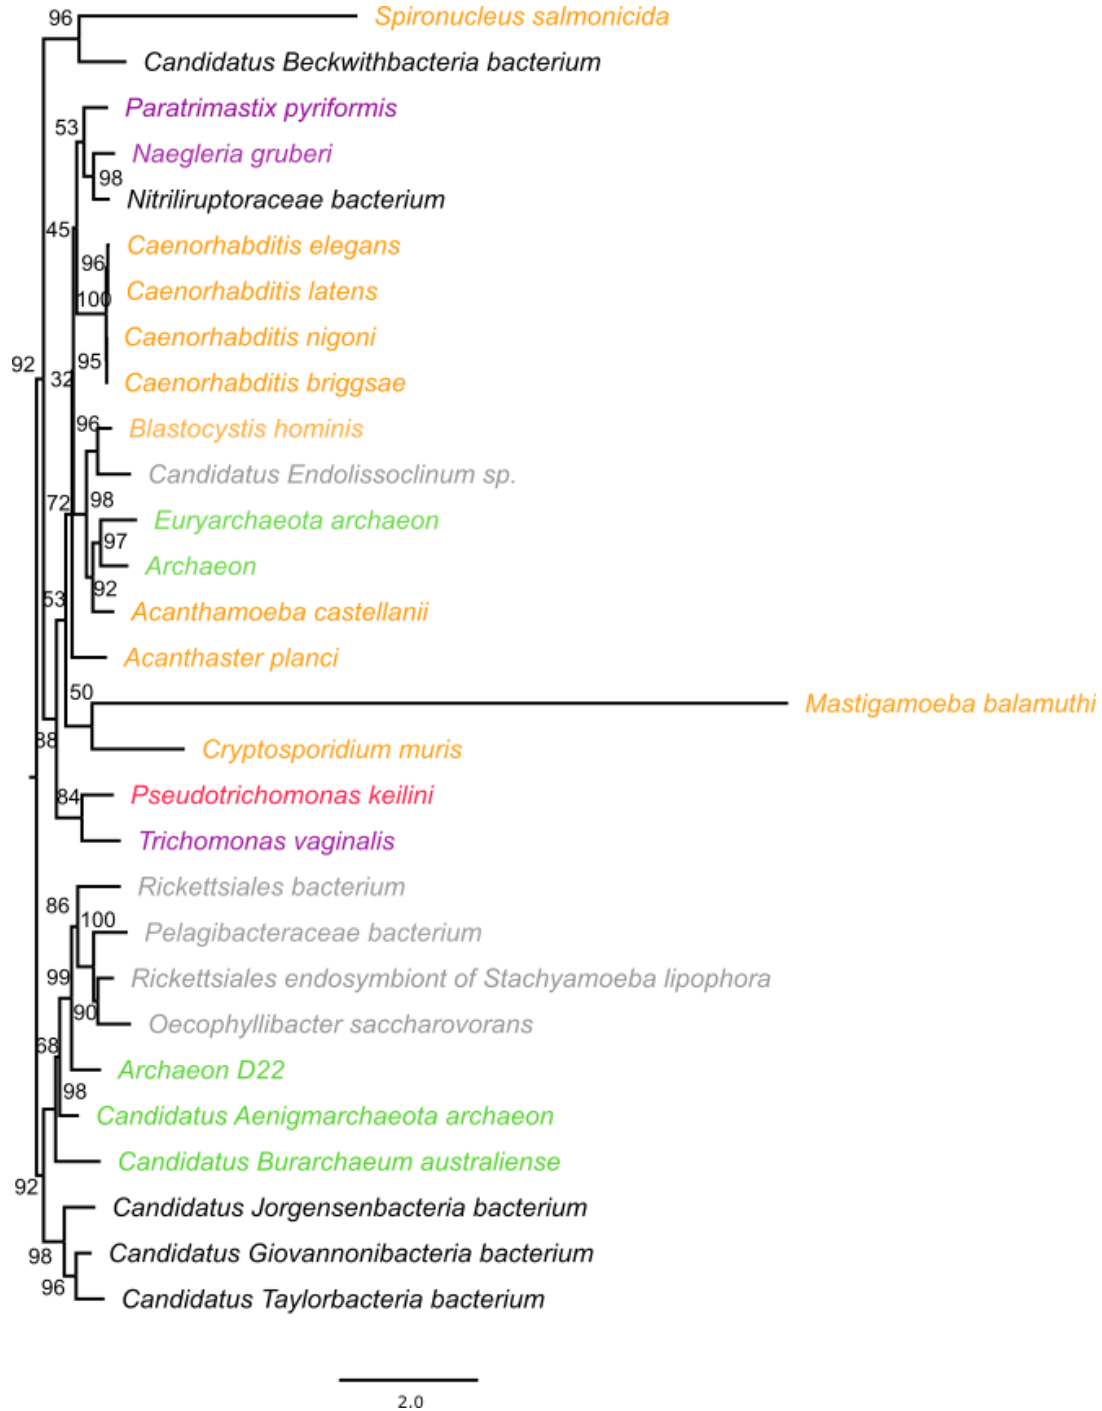

**Figure S12: Phylogenetic analysis of Serine hydroxymethyltransferase (SHMT) enzyme** which also plays a role in the glycine system. The tree shows that neither eukaryotes nor excavates are monophyletic. However, *P. keilini* and *Trichomonas vaginalis* are grouping together. The maximum likelihood gene tree was inferred using IQ-TREE. Branch supports are

ultrafast bootstrap values, and branch lengths are proportional to the expected number of substitutions per site, as indicated by the scale bar.

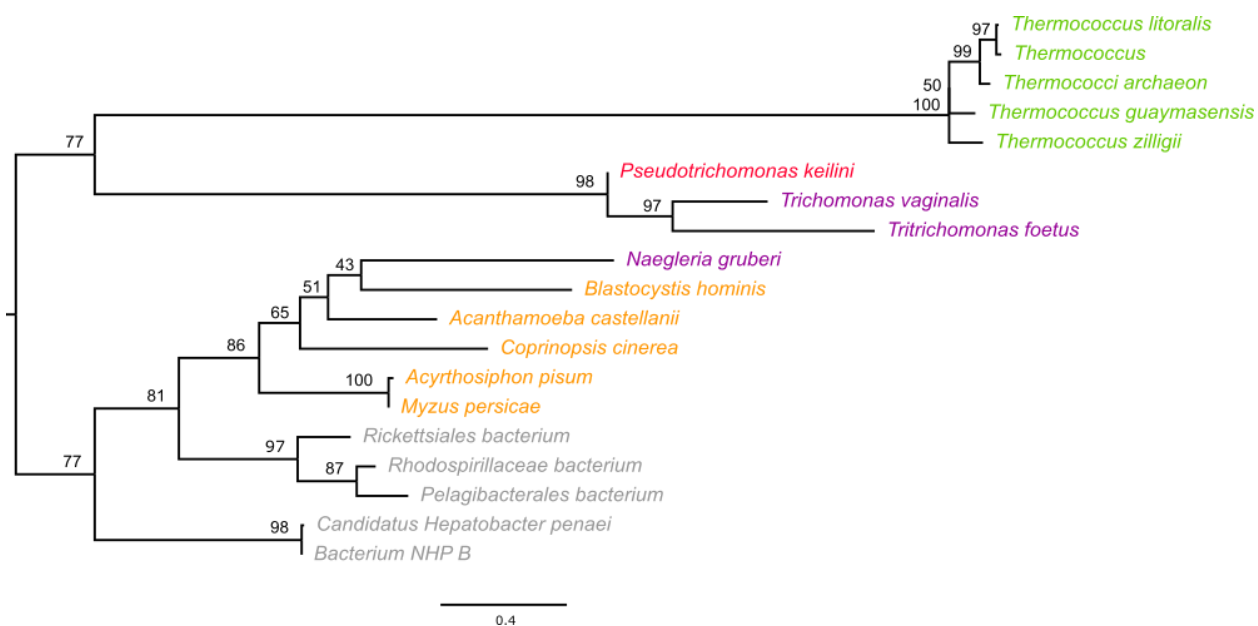

**Figure S13: Phylogeny of 24-kDa NADH-quinone oxidoreductase subunit E (NUOE)**, one of the components of Complex I of the electron transport chain. In this tree, the *P. keilini* sequence is grouping with the other parabasalians of *Trichomonas vaginalis* and *Tritrichomonas foetus*, and not with alphaproteobacteria. The maximum likelihood gene tree was inferred using IQ-TREE. Branch supports are ultrafast bootstrap values, and branch lengths are proportional to the expected number of substitutions per site, as indicated by the scale bar.



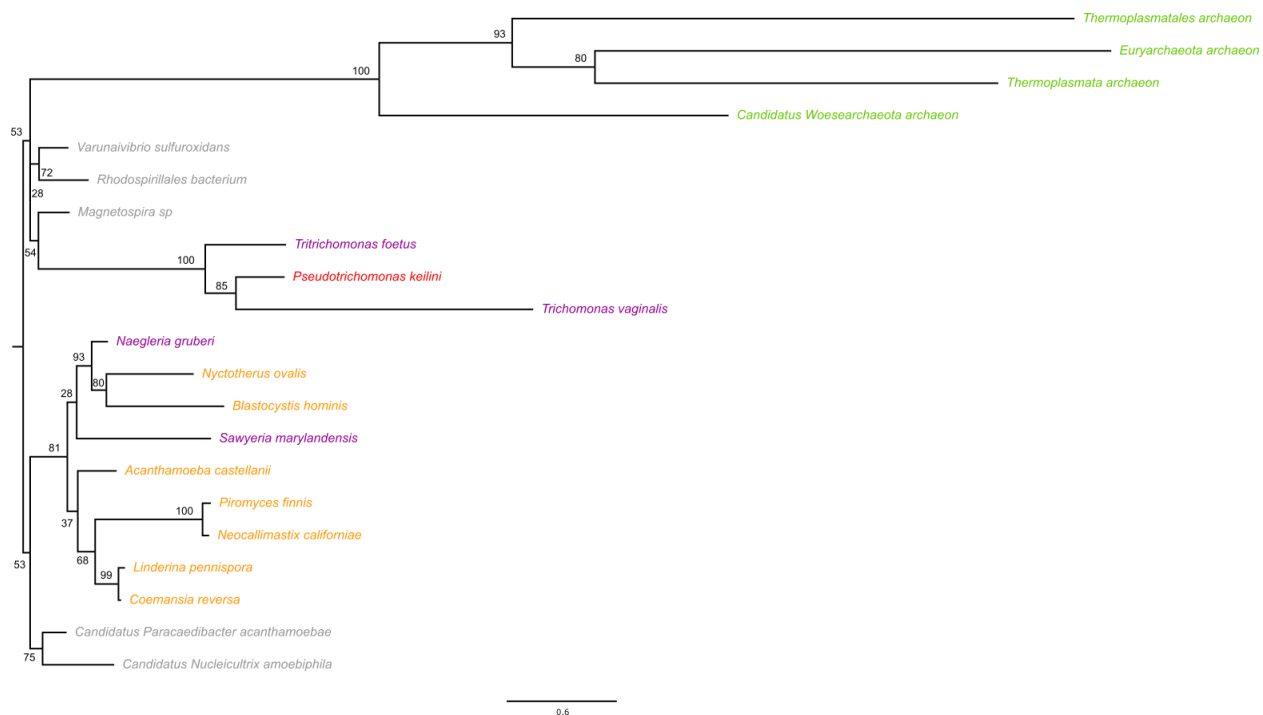

**Figure S14: Phylogenetic tree of 51-kDa NADH-quinone oxidoreductase subunit F (NUOF)**, another component of Complex I of the electron transport chain. The tree topology shows that the parabasal group of *P. keilini*, *Trichomonas vaginalis*, and *Tritrichomonas foetus* are grouping together within a larger clade of alphaproteobacterial sequences. This could indicate an endosymbiotic origin of the enzyme. The maximum likelihood gene tree was inferred using IQ-TREE. Branch supports are ultrafast bootstrap values, and branch lengths are proportional to the expected number of substitutions per site, as indicated by the scale bar.

**Supplementary Table S1: List of species used in the contaminant-filtering step.**

| Species name                               | Domain     | Taxonomy       |
|--------------------------------------------|------------|----------------|
| <i>Cyanophora paradoxa</i>                 | Eukaryotes | Archaeplastida |
| <i>Chondrus crispus</i>                    |            |                |
| <i>Galdieria sulphuraria</i>               |            |                |
| <i>Cyanidioschyzon merolae</i>             |            |                |
| <i>Porphyra umbilicalis</i>                |            |                |
| <i>Chlamydomonas reinhardtii</i>           |            |                |
| <i>Volvox carteri</i>                      |            |                |
| <i>Tetraselmis sp</i>                      |            |                |
| <i>Monoraphidium neglectum</i>             |            |                |
| <i>Bathycoccus prasinus</i>                |            |                |
| <i>Ostreococcus tauri</i>                  |            |                |
| <i>Micromonas pusilla</i>                  |            |                |
| <i>Auxenochlorella protothecoides</i>      |            |                |
| <i>Oryza sativa</i>                        |            |                |
| <i>Arabidopsis thaliana</i>                |            |                |
| <i>Physcomitrella patens</i>               |            |                |
| <i>Selaginella moellendorffii</i>          |            |                |
| <i>Klebsormidium nitens</i>                |            |                |
|                                            |            |                |
| <i>Carpediemonas membranifera</i>          | Eukaryotes | Excavates      |
| <i>Dysnectes brevis</i>                    |            |                |
| <i>Ergobibamus cyprinoides</i>             |            |                |
| <i>Kipferlia bialata</i>                   |            |                |
| <i>Trepomonas sp</i>                       |            |                |
| <i>Aduncisulcus paluster</i>               |            |                |
| <i>Chilomastix cuspidata</i>               |            |                |
| <i>Trimastix marina</i>                    |            |                |
| <i>Naegleria gruberi</i>                   |            |                |
| <i>Stygiella incarcerata</i>               |            |                |
| <i>Bodo saltans</i>                        |            |                |
| <i>Diplonema papillatum</i>                |            |                |
| <i>Euglena gracilis</i>                    |            |                |
| <i>Giardia lamblia ATCC50803</i>           |            |                |
| <i>Leishmania braziliensis</i>             |            |                |
| <i>Leishmania donovani species complex</i> |            |                |
| <i>Leishmania infantum JPCM5</i>           |            |                |
| <i>Leishmania major Friedlin</i>           |            |                |

|                                               |  |  |
|-----------------------------------------------|--|--|
| <i>Leishmania mexicana</i> MHOM GT 2001 U1103 |  |  |
| <i>Leishmania panamensis</i>                  |  |  |
| <i>Leptomonas pyrrocoris</i>                  |  |  |
| <i>Leptomonas seymouri</i>                    |  |  |
| <i>Phytomonas</i> sp isolate EM1              |  |  |
| <i>Trypanosoma brucei brucei</i>              |  |  |
| <i>Trypanosoma brucei gambiense</i>           |  |  |
| <i>Trypanosoma congolense</i> IL3000          |  |  |
| <i>Trypanosoma cruzi</i> CLBrener             |  |  |
| <i>Trypanosoma cruzi</i> Dm28c                |  |  |
| <i>Trypanosoma cruzi</i> ID25                 |  |  |
| <i>Trypanosoma cruzi marinkellei</i>          |  |  |
| <i>Trypanosoma equiperdum</i>                 |  |  |
| <i>Trypanosoma grayi</i>                      |  |  |
| <i>Trypanosoma rangeli</i> SC58               |  |  |
| <i>Trypanosoma theileri</i>                   |  |  |
| <i>Trypanosoma vivax</i> Y486                 |  |  |
| <i>Trichomonas vaginalis</i> G3               |  |  |
| <i>Tritrichomonas foetus</i>                  |  |  |
| <i>Monocercomonoides</i>                      |  |  |
|                                               |  |  |
| <i>Ectocarpus siliculosus</i>                 |  |  |
| <i>Thalassiosira pseudonana</i>               |  |  |
| <i>Fragilariopsis cylindrus</i>               |  |  |
| <i>Nannochloropsis gaditana</i>               |  |  |
| <i>Thraustotheca clavata</i>                  |  |  |
| <i>Phaeodactylum tricornutum</i>              |  |  |
| <i>Thalassiosira oceanica</i>                 |  |  |
| <i>Aureococcus anophagefferens</i>            |  |  |
| <i>Leptocylindrus danicus</i>                 |  |  |
| <i>Odontella aurita</i>                       |  |  |
| <i>Nitzschia</i> RCC80                        |  |  |
| <i>Bolidomonas pacifica</i>                   |  |  |
| <i>Fistulifera solaris</i>                    |  |  |
| <i>Tetrahymena thermophila</i>                |  |  |
| <i>Paramecium tetraurelia</i>                 |  |  |
| <i>Stylonychia lemnae</i>                     |  |  |
| <i>Protoceratium reticulatum</i>              |  |  |
| <i>Noctiluca scintillans</i>                  |  |  |
| <i>Togula jolla</i>                           |  |  |

SAR

|                                      |  |                                                  |
|--------------------------------------|--|--------------------------------------------------|
| <i>Polarella glacialis</i>           |  |                                                  |
| <i>Amphidinium carterae</i>          |  |                                                  |
| <i>Oxytricha trifallax</i>           |  |                                                  |
| <i>Stentor coeruleus</i>             |  |                                                  |
| <i>Bigelowiella natans</i>           |  |                                                  |
| <i>Reticulomyxa filosa</i>           |  |                                                  |
| <i>Elphidium margaritaceum</i>       |  |                                                  |
|                                      |  |                                                  |
| <i>Cryptophyceae sp</i>              |  | <b>Cryptista</b>                                 |
| <i>Guillardia theta</i>              |  |                                                  |
| <i>Goniomonas avonlea</i>            |  |                                                  |
|                                      |  |                                                  |
| <i>Emiliana huxleyi</i>              |  | <b>Haptista</b>                                  |
| <i>Chrysochromulina sp</i>           |  |                                                  |
| <i>Raphidiophrys heterophryoidea</i> |  |                                                  |
| <i>Acanthocystis sp</i>              |  |                                                  |
| <i>Choanocystis sp</i>               |  |                                                  |
| <i>Raineriophrys erinaceoides</i>    |  |                                                  |
|                                      |  |                                                  |
| <i>Allomyces macrogynus</i>          |  | <b>Obazoa</b>                                    |
| <i>Schizosaccharomyces pombe</i>     |  |                                                  |
| <i>Spizellomyces punctatus</i>       |  |                                                  |
| <i>Lobosporangium transversale</i>   |  |                                                  |
| <i>Parvularia atlantis</i>           |  |                                                  |
| <i>Fonticula alba</i>                |  |                                                  |
| <i>Amphimedon queenslandica</i>      |  |                                                  |
| <i>Limulus polyphemus</i>            |  |                                                  |
| <i>Xenopus tropicalis</i>            |  |                                                  |
| <i>Nematostella vectensis</i>        |  |                                                  |
| <i>Lottia gigantea</i>               |  |                                                  |
| <i>Monosiga brevicollis</i>          |  |                                                  |
| <i>Salpingoeca rosetta</i>           |  |                                                  |
|                                      |  |                                                  |
| <i>Gefionella okellyi</i>            |  | <b>Malawimonadidae</b>                           |
|                                      |  |                                                  |
| <i>Ancoracysta twisti</i>            |  | <b>Janouskovec</b>                               |
|                                      |  |                                                  |
| <i>Ancyromonas sigmoides</i>         |  | <b>Eukaryota incertae sedis;<br/>Ancoracysta</b> |

|                                                                               |                 |                                                          |
|-------------------------------------------------------------------------------|-----------------|----------------------------------------------------------|
| <i>Fabomonas tropica</i>                                                      |                 | <b>Ancyromonadida;<br/>Planomonadidae;<br/>Fabomonas</b> |
| <i>Nutomonas longa</i>                                                        |                 | <b>Ancyromonadida;<br/>Nutomonas</b>                     |
|                                                                               |                 |                                                          |
| <i>Diphylleia rotans</i>                                                      |                 | <b>CRuMs; Collodictyonidae;<br/>Diphylleia</b>           |
| <i>Rigifila ramosa</i>                                                        |                 | <b>CRuMs; Rigifilida; Rigifila</b>                       |
|                                                                               |                 |                                                          |
| <i>Candidatus Berkelbacteria bacterium</i><br>GWA2_46_7                       |                 | <b>CPR Berkelbacteria</b>                                |
| <i>Candidatus Berkelbacteria bacterium</i><br>GWA2_35_9                       |                 | <b>CPR Berkelbacteria</b>                                |
| <i>Candidatus Berkelbacteria bacterium</i><br>GWA2_38_9                       |                 | <b>CPR Berkelbacteria</b>                                |
| <i>Candidatus Berkelbacteria bacterium</i><br>GWAE1_39_12                     |                 | <b>CPR Berkelbacteria</b>                                |
| <i>Candidatus Berkelbacteria bacterium</i><br>CG1_02_42_45                    |                 | <b>CPR Berkelbacteria</b>                                |
| <i>Candidatus Berkelbacteria bacterium</i><br>CG2_30_39_44                    |                 | <b>CPR Berkelbacteria</b>                                |
| <i>Candidatus Berkelbacteria bacterium</i><br>CG2_30_43_20                    |                 | <b>CPR Berkelbacteria</b>                                |
| <i>Candidatus Berkelbacteria bacterium</i><br>RIFCSPLOWO2_01_FULL_50_28       |                 | <b>CPR Berkelbacteria</b>                                |
| <i>Candidatus Berkelbacteria bacterium</i><br>RIFOXYA2_FULL_43_10             |                 | <b>CPR Berkelbacteria</b>                                |
| <i>Candidatus Candidate division WS6</i><br><i>bacterium</i> GW2011_GWA2_37_6 | <b>Bacteria</b> | <b>CPR Dojkabacteria</b>                                 |
| <i>Candidate division WS6 bacterium</i><br>GW2011_GWF1_35_23                  |                 | <b>CPR Dojkabacteria</b>                                 |
| <i>Candidate division Kazan bacterium</i><br>GW2011_GWA1_50_15                |                 | <b>CPR Kazan</b>                                         |
| <i>Candidate division Kazan bacterium</i><br>GW2011_GWA1_44_22                |                 | <b>CPR Kazan</b>                                         |
| <i>Candidatus Amesbacteria bacterium</i><br>RIFOXYB1_FULL_44_23               |                 | <b>CPR Microgenomates</b>                                |
| <i>Candidatus Beckwithbacteria bacterium</i><br>GW2011_GWC1_49_16             |                 | <b>CPR Microgenomates</b>                                |
| <i>Candidatus Collierbacteria bacterium</i><br>RIFOXYB1_FULL_49_13            |                 | <b>CPR Microgenomates</b>                                |
| <i>Candidatus Curtissbacteria bacterium</i><br>RBG_16_39_7                    |                 | <b>CPR Microgenomates</b>                                |
| <i>Candidatus Daviesbacteria bacterium</i><br>RIFCSPHIGHO2_12_FULL_37_16      |                 | <b>CPR Microgenomates</b>                                |

|                                                                             |  |                           |
|-----------------------------------------------------------------------------|--|---------------------------|
| <i>Candidatus Gottesmanbacteria bacterium</i><br>GW2011_GWA1_43_11          |  | <b>CPR Microgenomates</b> |
| <i>Microgenomates group bacterium</i><br>GW2011_GWA2_46_16                  |  | <b>CPR Microgenomates</b> |
| <i>Candidatus Woykebacteria bacterium</i><br>GWB1_45_5                      |  | <b>CPR Microgenomates</b> |
| <i>Candidatus Levybacteria bacterium</i><br>RIFCSPHIGHO2_02_FULL_37_10      |  | <b>CPR Microgenomates</b> |
| <i>Candidatus Pacebacteria bacterium</i><br>CG1_02_43_31                    |  | <b>CPR Microgenomates</b> |
| <i>Candidatus Woykebacteria bacterium</i><br>RBG_13_40_15                   |  | <b>CPR Microgenomates</b> |
| <i>Candidatus Woykebacteria bacterium</i><br>RBG_13_40_7b                   |  | <b>CPR Microgenomates</b> |
| <i>Candidatus Roizmanbacteria bacterium</i><br>RIFCSPLOWO2_01_FULL_45_11    |  | <b>CPR Microgenomates</b> |
| <i>Candidatus Shapirobacteria bacterium</i><br>GW2011_GWF2_37_20            |  | <b>CPR Microgenomates</b> |
| <i>Candidatus Woesebacteria bacterium</i><br>GW2011_GWD2_40_19              |  | <b>CPR Microgenomates</b> |
| <i>Candidatus Woesebacteria bacterium</i><br>RIFCSPHIGHO2_01_FULL_41_10     |  | <b>CPR Microgenomates</b> |
| <i>Candidatus Falkowbacteria bacterium</i><br>GW2011_GWE2_38_254            |  | <b>CPR Parcubacteria</b>  |
| <i>Candidatus Giovannonibacteria bacterium</i><br>RIFCSPHIGHO2_02_43_16     |  | <b>CPR Parcubacteria</b>  |
| <i>Candidatus Jorgensenbacteria bacterium</i><br>GWA1_54_12                 |  | <b>CPR Parcubacteria</b>  |
| <i>Candidatus Jorgensenbacteria bacterium</i><br>RIFCSPHIGHO2_02_FULL_45_20 |  | <b>CPR Parcubacteria</b>  |
| <i>Candidatus Kaiserbacteria bacterium</i><br>RIFCSPHIGHO2_01_FULL_56_24    |  | <b>CPR Parcubacteria</b>  |
| <i>Parcubacteria bacterium</i> SCGC<br>AAA011-A09                           |  | <b>CPR Parcubacteria</b>  |
| <i>Candidatus Magasanikbacteria bacterium</i><br>GW2011_GWA2_45_39          |  | <b>CPR Parcubacteria</b>  |
| <i>Candidatus Magasanikbacteria bacterium</i><br>GW2011_GWA2_46_17          |  | <b>CPR Parcubacteria</b>  |
| <i>Candidatus Moranbacteria bacterium</i><br>RIFCSPHIGHO2_01_FULL_55_24     |  | <b>CPR Parcubacteria</b>  |
| <i>Candidatus Moranbacteria bacterium</i><br>GW2011_GWC2_37_8               |  | <b>CPR Parcubacteria</b>  |
| <i>Candidatus Nomurabacteria bacterium</i><br>CG1_02_31_12                  |  | <b>CPR Parcubacteria</b>  |
| <i>Candidatus Nomurabacteria bacterium</i><br>RIFCSPLOWO2_01_FULL_36_10b    |  | <b>CPR Parcubacteria</b>  |

|                                                                            |  |                                                     |
|----------------------------------------------------------------------------|--|-----------------------------------------------------|
| <i>Candidatus Uhrbacteria bacterium</i><br>RIFCSPLOWO2_02_FULL_49_11       |  | <b>CPR Parcubacteria</b>                            |
| <i>Candidatus Uhrbacteria bacterium</i><br>RIFCSPLOWO2_02_FULL_54_37       |  | <b>CPR Parcubacteria</b>                            |
| <i>Candidatus Uhrbacteria bacterium</i><br>RIFOXYC2_FULL_47_19             |  | <b>CPR Parcubacteria</b>                            |
| <i>Candidatus Wolfbacteria bacterium</i><br>RIFOXYB1_FULL_54_12            |  | <b>CPR Parcubacteria</b>                            |
| <i>Candidatus Yanofskybacteria bacterium</i><br>RIFCSPHIGHO2_01_FULL_44_17 |  | <b>CPR Parcubacteria</b>                            |
| <i>Candidatus Peregrinibacteria bacterium</i><br>CG1_02_41_10              |  | <b>CPR Peregrinibacteria</b>                        |
| <i>Candidatus Peregrinibacteria bacterium</i><br>CG1_02_54_53              |  | <b>CPR Peregrinibacteria</b>                        |
| <i>Candidatus Saccharibacteria bacterium</i><br>CG2_30_41_52               |  | <b>CPR Saccharibacteria</b>                         |
| <i>Candidatus Saccharibacteria bacterium</i><br>RIFCSPHIGHO2_12_FULL_49_19 |  | <b>CPR Saccharibacteria</b>                         |
| <i>Candidate division WWE3 bacterium</i><br>RIFCSPLOWO2_01_FULL_42_11      |  | <b>CPR WWE3</b>                                     |
|                                                                            |  |                                                     |
| <i>Chloroherpeton thalassium</i> ATCC 35110                                |  | <b>FBC Chlorobi</b>                                 |
| <i>Gemmatimonadetes bacterium</i><br>RIFCSPLOWO2_12_FULL_68_9              |  | <b>FBC Gemmatimonadetes</b>                         |
| <i>Ignavibacteria bacterium</i> GWA2_55_25                                 |  | <b>FBC Ignavibacteria</b>                           |
| <i>Candidate division Zixibacteria bacterium</i><br>SM23_73_2              |  | <b>FBC Zixibacteria</b>                             |
|                                                                            |  |                                                     |
| <i>Thermithiobacillus tepidarius</i> DSM 3134                              |  | <b>Proteobacteria</b><br><b>Acidithiobacillia</b>   |
| <i>Kordiimonas gwangyangensis</i> DSM 19435                                |  | <b>Proteobacteria</b><br><b>Alphaproteobacteria</b> |
| <i>Pelagibacterium halotolerans</i> B2                                     |  | <b>Proteobacteria</b><br><b>Alphaproteobacteria</b> |
| <i>Rhodobacteraceae bacterium</i><br>CG2_30_10_405                         |  | <b>Proteobacteria</b><br><b>Alphaproteobacteria</b> |
| <i>Granulibacter bethesdensis</i> CGDNIH1                                  |  | <b>Proteobacteria</b><br><b>Alphaproteobacteria</b> |
| <i>Tistrella mobilis</i> KA081020 65                                       |  | <b>Proteobacteria</b><br><b>Alphaproteobacteria</b> |
| <i>Anaplasma marginale</i>                                                 |  | <b>Proteobacteria</b><br><b>Alphaproteobacteria</b> |
| <i>Citromicrobium</i> sp. JLT1363                                          |  | <b>Proteobacteria</b><br><b>Alphaproteobacteria</b> |
| <i>Bordetella bronchiseptica</i> RB50                                      |  | <b>Proteobacteria</b><br><b>BetaProteobacteria</b>  |

|                                                       |  |                                                       |
|-------------------------------------------------------|--|-------------------------------------------------------|
| <i>Comamonas testosteroni</i> TK102                   |  | <b>Proteobacteria</b><br><b>BetaProteobacteria</b>    |
| <i>Gallionella capsiferiformans</i> ES 2              |  | <b>Proteobacteria</b><br><b>BetaProteobacteria</b>    |
| <i>Methylovorus</i> sp. SIP3 4                        |  | <b>Proteobacteria</b><br><b>BetaProteobacteria</b>    |
| <i>Deefgea rivuli</i> DSM 18356                       |  | <b>Proteobacteria</b><br><b>BetaProteobacteria</b>    |
| <i>Bacteriovorax marinus</i> SJ                       |  | <b>Proteobacteria</b><br><b>Deltaproteobacteria</b>   |
| <i>Desulfotignum phosphitoxidans</i> FiPS 3           |  | <b>Proteobacteria</b><br><b>Deltaproteobacteria</b>   |
| <i>Myxococcus xanthus</i> DK 1622                     |  | <b>Proteobacteria</b><br><b>Deltaproteobacteria</b>   |
| <i>Syntrophus aciditrophicus</i> SB                   |  | <b>Proteobacteria</b><br><b>Deltaproteobacteria</b>   |
| <i>Lebetimonas</i> sp. JS032                          |  | <b>Proteobacteria</b><br><b>Epsilonproteobacteria</b> |
| <i>Anaerobiospirillum succiniciproducens</i> DSM 6400 |  | <b>Proteobacteria</b><br><b>Gammaproteobacteria</b>   |
| <i>Haliea rubra</i> CM41 15a DSM                      |  | <b>Proteobacteria</b><br><b>Gammaproteobacteria</b>   |
| <i>Arhodomonas aquaeolei</i> DSM 8974                 |  | <b>Proteobacteria</b><br><b>Gammaproteobacteria</b>   |
| <i>Arsenophonus nasoniae</i> DSM 15247                |  | <b>Proteobacteria</b><br><b>Gammaproteobacteria</b>   |
| <i>Legionella micdadei</i> ATCC 33218                 |  | <b>Proteobacteria</b><br><b>Gammaproteobacteria</b>   |
| <i>Methyloglobulus morosus</i> KoM1                   |  | <b>Proteobacteria</b><br><b>Gammaproteobacteria</b>   |
| <i>Saccharospirillum impatiens</i> DSM 12546          |  | <b>Proteobacteria</b><br><b>Gammaproteobacteria</b>   |
| <i>Alkanindiges illinoisensis</i> DSM 15370           |  | <b>Proteobacteria</b><br><b>Gammaproteobacteria</b>   |
| <i>Photobacterium profundum</i> SS9                   |  | <b>Proteobacteria</b><br><b>Gammaproteobacteria</b>   |
| <i>Frateuria terrea</i> CGMCC 1.7053                  |  | <b>Proteobacteria</b><br><b>Gammaproteobacteria</b>   |
| <i>Mariprofundus ferrooxydans</i> M34                 |  | <b>Proteobacteria</b><br><b>Zetaproteobacteria</b>    |
|                                                       |  |                                                       |
| <i>RIFCSPLOWO2 2 FULL 45 22</i>                       |  | <b>PVC Chlamydiae</b>                                 |
| <i>Chlamydophila abortus</i> S263                     |  | <b>PVC Chlamydiae</b>                                 |
| <i>Lentisphaerae bacterium</i> GWF2_52_8              |  | <b>PVC Lentisphaerae</b>                              |
| <i>Candidatus Omnitrophica bacterium</i> CG1_02_46_14 |  | <b>PVC Omnitrophica</b>                               |



|                                                                       |  |                                          |
|-----------------------------------------------------------------------|--|------------------------------------------|
| <i>Planctomycetes bacterium</i> GWB2_41_19                            |  | <b>PVC Planctomycetes</b>                |
| <i>Phycisphaerae bacterium</i> SM1_79                                 |  | <b>PVC Plantomycetes</b>                 |
|                                                                       |  |                                          |
| <i>Arcanobacterium haemolyticum</i> DSM 20595                         |  | <b>Terrabacteria<br/>Actinobacteria</b>  |
| <i>Corynebacterium argentoratense</i> DSM 44202                       |  | <b>Terrabacteria<br/>Actinobacteria</b>  |
| <i>Gulosibacter molinativorax</i> DSM 13485                           |  | <b>Terrabacteria<br/>Actinobacteria</b>  |
| <i>Aestuariimicrobium kwangyangense</i> DSM 21549                     |  | <b>Terrabacteria<br/>Actinobacteria</b>  |
| <i>Bifidobacterium animalis animalis</i> ATCC 25527                   |  | <b>Terrabacteria<br/>Actinobacteria</b>  |
| <i>Eggerthella</i> sp. YY7918                                         |  | <b>Terrabacteria<br/>Actinobacteria</b>  |
| <i>Rhodoluna laticola</i> MWH Ta8                                     |  | <b>Terrabacteria<br/>Actinobacteria</b>  |
| <i>Enorma massiliensis</i> phI                                        |  | <b>Terrabacteria<br/>Actinobacteria</b>  |
| <i>Anaerolinea thermophila</i> UNI-1                                  |  | <b>Terrabacteria Chloroflexi</b>         |
| <i>Dehalococcoidia bacterium</i> DG_22                                |  | <b>Terrabacteria Chloroflexi</b>         |
| <i>Chloroflexi bacterium</i> RBG_13_50_10                             |  | <b>Terrabacteria Chloroflexi</b>         |
| <i>Aphanizomenon flos aquae</i> NIES 81                               |  | <b>Terrabacteria<br/>Cyanobacteria</b>   |
| <i>Crinalium epipsammum</i> PCC 9333                                  |  | <b>Terrabacteria<br/>Cyanobacteria</b>   |
| <i>Oscillatoria</i> sp. PCC 7112                                      |  | <b>Terrabacteria<br/>Cyanobacteria</b>   |
| <i>Stanieria cyanosphaera</i> PCC 7437                                |  | <b>Terrabacteria<br/>Cyanobacteria</b>   |
| <i>Bacillus anthracis</i> 52 G                                        |  | <b>Terrabacteria Firmicutes</b>          |
| <i>Marinococcus halotolerans</i> DSM 16375                            |  | <b>Terrabacteria Firmicutes</b>          |
| <i>Fructobacillus fructosus</i> KCTC 3544                             |  | <b>Terrabacteria Firmicutes</b>          |
| <i>Streptococcus mutans</i> GS 5                                      |  | <b>Terrabacteria Firmicutes</b>          |
| <i>Youngiibacter fragile</i> 232.1                                    |  | <b>Terrabacteria Firmicutes</b>          |
| <i>Filifactor alocis</i> ATCC 35896                                   |  | <b>Terrabacteria Firmicutes</b>          |
| <i>Orenia marismortui</i> DSM 5156                                    |  | <b>Terrabacteria Firmicutes</b>          |
| <i>Veillonella parvula</i> DSM 2008                                   |  | <b>Terrabacteria Firmicutes</b>          |
| <i>Melainabacteria bacterium</i> MEL_A1                               |  | <b>Terrabacteria<br/>Melainabacteria</b> |
| <i>Candidatus Melainabacteria bacterium</i> RIFCSPLOWO2_12_FULL_35_11 |  | <b>Terrabacteria<br/>Melainabacteria</b> |
| <i>Mesoplasma florum</i> W37                                          |  | <b>Terrabacteria Tenericutes</b>         |
| <i>Thermosynechococcus elongatus</i> BP1                              |  | <b>Terrabacteria<br/>Cyanobacteria</b>   |

|                                                                     |  |                                                    |
|---------------------------------------------------------------------|--|----------------------------------------------------|
| <i>Deinococcus geothermalis</i> DSM 11300                           |  | <b>Terrabacteria</b><br><b>Deinococcus-Thermus</b> |
| <i>Acidobacteria bacterium</i> RBG_16_68_9                          |  | <b>Acidobacteria</b>                               |
| <i>Acidobacteria bacterium</i><br>RIFCSPLOWO2_02_FULLL_68_18        |  | <b>Acidobacteria</b>                               |
| <i>Acidobacterium</i> sp. MP5ACTX8                                  |  | <b>Acidobacteria</b>                               |
| <i>Holophaga foetida</i> TMBS4 DSM 6591                             |  | <b>Acidobacteria</b>                               |
| <i>Candidatus Aminicenantes bacterium</i><br>RBG_16_66_30           |  | <b>Aminicenantes</b>                               |
| <i>Hydrogenobacter thermophilus</i> TK 6                            |  | <b>Aquificae</b>                                   |
| <i>Thermovibrio ammonificans</i> HB 1                               |  | <b>Aquificae</b>                                   |
| <i>Armatimonadetes bacterium</i><br>13_1_40CM_64_14                 |  | <b>Armatimonadetes</b>                             |
| <i>Bacteroides fragilis</i> NCTC 9343                               |  | <b>Bacteroidetes</b>                               |
| <i>Marinilabilia salmonicolor</i> JCM 21150                         |  | <b>Bacteroidetes</b>                               |
| <i>Cyclobacterium marinum</i> DSM 745                               |  | <b>Bacteroidetes</b>                               |
| <i>Indibacter alkaliphilus</i> LW1                                  |  | <b>Bacteroidetes</b>                               |
| <i>Epilithonimonas tenax</i> DSM 16811                              |  | <b>Bacteroidetes</b>                               |
| <i>Galbibacter</i> sp. ck I2 15                                     |  | <b>Bacteroidetes</b>                               |
| <i>Gracilimonas tropica</i> DSM 19535                               |  | <b>Bacteroidetes</b>                               |
| <i>Arcticibacter svalbardensis</i> MN12 7                           |  | <b>Bacteroidetes</b>                               |
| <i>Chrysiogenes arsenatis</i> DSM 11915                             |  | <b>Chrysiogenetes</b>                              |
| <i>Denitrovibrio acetiphilus</i> DSM 12809                          |  | <b>Deferribacteres</b>                             |
| <i>Fusobacterium nucleatum nucleatum</i> ATCC 25586                 |  | <b>Fusobacteria</b>                                |
| <i>Candidatus Gracilibacteria bacterium</i><br>CG1_02_38_174        |  | <b>Gracilibacteria</b>                             |
| <i>Candidatus Vecturithrix granuli</i>                              |  | <b>Modulibacteria</b>                              |
| <i>Nitrospinae bacterium</i><br>RIFCSPLOWO2_12_FULLL_47_7           |  | <b>Nitrospinae</b>                                 |
| <i>Nitrospirae bacterium</i> GWC2_57_9                              |  | <b>Nitrospirae</b>                                 |
| <i>Nitrospira defluvii</i>                                          |  | <b>Nitrospirae</b>                                 |
| <i>Brachyspira murdochii</i> DSM 12563                              |  | <b>Spirochaetes</b>                                |
| <i>Leptospira biflexa</i> serovar Patoc strain<br>'Patoc 1 (Paris)' |  | <b>Spirochaetes</b>                                |
| <i>Thermanaerovibrio acidaminovorans</i> DSM 6589                   |  | <b>Synergistetes</b>                               |
| <i>Thermodesulfatator indicus</i> CIR29812 DSM 15286                |  | <b>Thermodesulfobacteria</b>                       |
| <i>Kosmotoga olearia</i> TBF 19.5.1                                 |  | <b>Thermotogae</b>                                 |
| <i>Candidatus Wirthbacteria bacterium</i> CG2 30_54_11              |  | <b>Wirthbacteria</b>                               |

|                                                                                 |                |                                                  |
|---------------------------------------------------------------------------------|----------------|--------------------------------------------------|
| <i>Heimdallarchaeota</i> LC2                                                    | <b>Archaea</b> | <b>Asgard group Candidatus Heimdallarchaeota</b> |
| <i>Heimdallarchaeota</i> LC3                                                    |                | <b>Asgard group Candidatus Heimdallarchaeota</b> |
| <i>Lokiarchaeum mirabilis</i>                                                   |                | <b>Asgard group Candidatus Lokiarchaeota</b>     |
| <i>Odinarchaeota</i> LCB4                                                       |                | <b>Asgard group Candidatus Odinarchaeota</b>     |
| <i>Thorarchaeota</i> AB25                                                       |                | <b>Asgard group Candidatus Thorarchaeota</b>     |
|                                                                                 |                |                                                  |
| <i>Candidatus Aenigmarchaeota</i><br>CG_4_10_14_3_um_filter_37_21               |                | <b>DPANN group Candidatus Aenigmarchaeota</b>    |
| <i>Candidatus Aenigmarchaeota</i> archaeon<br>CG01_land_8_20_14_3_00_37_9       |                | <b>DPANN group Candidatus Aenigmarchaeota</b>    |
| <i>Candidatus Diapherotrites</i> archaeon<br>CG11_big_fil_rev_8_21_14_0_20_37_9 |                | <b>DPANN group Candidatus Diapherotrite</b>      |
| archaeon GW2011_AR10 ( <i>Diapherotrites</i><br>archaeon AR10?)                 |                | <b>DPANN group Candidatus Diapherotrite</b>      |
| <i>Candidatus Huberarchaea</i> <i>crystalense</i>                               |                | <b>DPANN group Candidatus Huberarchaea</b>       |
| <i>Candidatus Micrarchaeum acidiphilum</i><br>ARMAN-2                           |                | <b>DPANN group Candidatus Micrarchaeota</b>      |
| <i>Candidatus Micrarchaeota</i> archaeon<br>A_DKE                               |                | <b>DPANN group Candidatus Micrarchaeota</b>      |
| <i>Candidatus Micrarchaeota</i> archaeon <i>Mia14</i>                           |                | <b>DPANN group Candidatus Micrarchaeota</b>      |
| <i>Candidatus Nanosalina</i>                                                    |                | <b>DPANN group Candidatus Nanohaloarchaeota</b>  |
| <i>Candidatus Nanosalinarum</i> (sp. J07AB56)                                   |                | <b>DPANN group Candidatus Nanohaloarchaeota</b>  |
| <i>Candidatus Nanopetramus</i> SG9                                              |                | <b>DPANN group Candidatus Nanohaloarchaeota</b>  |
| archaeon GW2011_AR13                                                            |                | <b>DPANN group Candidatus Pacearchaeota</b>      |
| archaeon GW2011_AR1                                                             |                | <b>DPANN group Candidatus Pacearchaeota</b>      |
| archaeon GW2011_AR6                                                             |                | <b>DPANN group Candidatus Pacearchaeota</b>      |
| <i>Candidatus Parvarchaeum acidiphilum</i><br>ARMAN-4                           |                | <b>DPANN group Candidatus Parvarchaeota</b>      |
| <i>Candidatus Parvarchaeum acidophilus</i><br>ARMAN-5                           |                | <b>DPANN group Candidatus Parvarchaeota</b>      |
| archaeon GW2011_AR15                                                            |                | <b>DPANN group Candidatus Woesearchaeota</b>     |
| archaeon GW2011_AR20                                                            |                | <b>DPANN group Candidatus Woesearchaeota</b>     |

|                                                               |  |                                              |
|---------------------------------------------------------------|--|----------------------------------------------|
| <i>archaeon GW2011_AR4</i>                                    |  | <b>DPANN group Candidatus Woesearchaeota</b> |
| <i>Nanoarchaeum equitans</i>                                  |  | <b>DPANN group Nanoarchaeota</b>             |
| <i>Candidatus Nanobsidianus stetteri</i>                      |  | <b>DPANN group Nanoarchaeota</b>             |
| <i>Candidatus Nanopusillus acidilobi</i>                      |  | <b>DPANN group Nanoarchaeota</b>             |
| <i>Candidatus Altiarchaeum CG_4_9_14_0_8_um_filter_32_206</i> |  | <b>DPANN group Candidatus Altiarchaeales</b> |
| <i>CG_SM1 (Alt 1) - Candidatus Altiarchaeum hamiconexum</i>   |  | <b>DPANN group Candidatus Altiarchaeales</b> |
| <i>WOR_SM1_SCG (Alt 2)</i>                                    |  | <b>DPANN group Candidatus Altiarchaeales</b> |
| <i>MSI_SMI (Alt 1) - Candidatus Altiarchaeum hamiconexum</i>  |  | <b>DPANN group Candidatus Altiarchaeales</b> |
| <i>Candidatus Altiarchaeales ex4484_2</i>                     |  | <b>DPANN group Candidatus Altiarchaeales</b> |
|                                                               |  |                                              |
| <i>Aciduliprofundum boonei (T469)</i>                         |  | <b>Euryarchaeota Aciduliprofundum boonei</b> |
| <i>Archaeoglobus fulgidus (DSM 4304)</i>                      |  | <b>Euryarchaeota Archaeoglobi</b>            |
| <i>Archaeoglobus sulfaticallidus</i>                          |  | <b>Euryarchaeota Archaeoglobi</b>            |
| <i>Hadesarchaea archaeon YNP_N21</i>                          |  | <b>Euryarchaeota Hadesarchaea</b>            |
| <i>Hadesarchaea YNP_45</i>                                    |  | <b>Euryarchaeota Hadesarchaea</b>            |
| <i>Natronomonas pharaonis (DSM 2160)</i>                      |  | <b>Euryarchaeota Halobacteria</b>            |
| <i>Haloarcula marismortui</i>                                 |  | <b>Euryarchaeota Halobacteria</b>            |
| <i>Halobacterium salinarum NRC-1</i>                          |  | <b>Euryarchaeota Halobacteria</b>            |
| <i>Halomicrobium mukohataei</i>                               |  | <b>Euryarchaeota Halobacteria</b>            |
| <i>Haloferax volcanii</i>                                     |  | <b>Euryarchaeota Halobacteria</b>            |
| <i>Natronococcus amylolyticus</i>                             |  | <b>Euryarchaeota Halobacteria</b>            |
| <i>Natronobacterium gregoryi (SP2)</i>                        |  | <b>Euryarchaeota Halobacteria</b>            |
| <i>Methanobacterium bryantii</i>                              |  | <b>Euryarchaeota Methanobacteria</b>         |
| <i>Methanobacterium formicicum</i>                            |  | <b>Euryarchaeota Methanobacteria</b>         |

|                                                 |  |                                                |
|-------------------------------------------------|--|------------------------------------------------|
| <i>Methanobacterium</i> sp. 42_16               |  | <b>Euryarchaeota</b><br><b>Methanobacteria</b> |
| <i>Methanobacterium subterraneum</i>            |  | <b>Euryarchaeota</b><br><b>Methanobacteria</b> |
| <i>Methanothermobacter marburgensis</i>         |  | <b>Euryarchaeota</b><br><b>Methanobacteria</b> |
| <i>Methanothermobacter thermoautotrophicus</i>  |  | <b>Euryarchaeota</b><br><b>Methanobacteria</b> |
| <i>Methanobrevibacter arboriphilus</i>          |  | <b>Euryarchaeota</b><br><b>Methanobacteria</b> |
| <i>Methanobrevibacter cuticularis</i>           |  | <b>Euryarchaeota</b><br><b>Methanobacteria</b> |
| <i>Methanobrevibacter filiformis</i>            |  | <b>Euryarchaeota</b><br><b>Methanobacteria</b> |
| <i>Methanobrevibacter oralis</i> JMR01          |  | <b>Euryarchaeota</b><br><b>Methanobacteria</b> |
| <i>Methanobrevibacter millerae</i>              |  | <b>Euryarchaeota</b><br><b>Methanobacteria</b> |
| <i>Methanobrevibacter ruminantium</i>           |  | <b>Euryarchaeota</b><br><b>Methanobacteria</b> |
| <i>Methanobrevibacter smithii</i>               |  | <b>Euryarchaeota</b><br><b>Methanobacteria</b> |
| <i>Methanosphaera cuniculi</i>                  |  | <b>Euryarchaeota</b><br><b>Methanobacteria</b> |
| <i>Methanosphaera stadtmannae</i>               |  | <b>Euryarchaeota</b><br><b>Methanobacteria</b> |
| <i>Methanosphaera</i> sp. WGK6                  |  | <b>Euryarchaeota</b><br><b>Methanobacteria</b> |
| <i>Methanothermus fervidus</i>                  |  | <b>Euryarchaeota</b><br><b>Methanobacteria</b> |
| <i>Methanocaldococcus jannaschii</i>            |  | <b>Euryarchaeota</b><br><b>Methanococci</b>    |
| <i>Methanotorrus formicicus</i>                 |  | <b>Euryarchaeota</b><br><b>Methanococci</b>    |
| <i>Methanococcus maripaludis</i>                |  | <b>Euryarchaeota</b><br><b>Methanococci</b>    |
| <i>Methanothermococcus thermolithotrophicus</i> |  | <b>Euryarchaeota</b><br><b>Methanococci</b>    |
| <i>Methanocella arvoryzae</i> (Rice Cluster I)  |  | <b>Euryarchaeota</b><br><b>Methanomicrobia</b> |
| <i>Methanocella paludicola</i> (SANA E)         |  | <b>Euryarchaeota</b><br><b>Methanomicrobia</b> |
| <i>Methanocorpusculum parvum</i>                |  | <b>Euryarchaeota</b><br><b>Methanomicrobia</b> |
| <i>Methanocorpusculum labreanum</i>             |  | <b>Euryarchaeota</b><br><b>Methanomicrobia</b> |

|                                                                       |  |                                                      |
|-----------------------------------------------------------------------|--|------------------------------------------------------|
| <i>Methanoculleus bourgensis</i>                                      |  | <b>Euryarchaeota</b><br><b>Methanomicrobia</b>       |
| <i>Methanospirillum hungatei</i>                                      |  | <b>Euryarchaeota</b><br><b>Methanomicrobia</b>       |
| <i>Candidatus Methanoperedens nitroreducens</i> (ANME-2d)             |  | <b>Euryarchaeota</b><br><b>Methanomicrobia</b>       |
| <i>Methanotherix soehngenii</i>                                       |  | <b>Euryarchaeota</b><br><b>Methanomicrobia</b>       |
| <i>Methanotherix thermoacetophila</i> (PT)                            |  | <b>Euryarchaeota</b><br><b>Methanomicrobia</b>       |
| <i>Methanococcoides methylutens</i>                                   |  | <b>Euryarchaeota</b><br><b>Methanomicrobia</b>       |
| <i>Methanohalophilus mahii</i>                                        |  | <b>Euryarchaeota</b><br><b>Methanomicrobia</b>       |
| <i>Methanosarcina acetivorans</i>                                     |  | <b>Euryarchaeota</b><br><b>Methanomicrobia</b>       |
| <i>Methanosarcina barkeri str. Fusaro</i>                             |  | <b>Euryarchaeota</b><br><b>Methanomicrobia</b>       |
| <i>Methanosarcina barkeri</i> CM1                                     |  | <b>Euryarchaeota</b><br><b>Methanomicrobia</b>       |
| <i>Methanosarcina mazei</i>                                           |  | <b>Euryarchaeota</b><br><b>Methanomicrobia</b>       |
| <i>Methanosarcina spelaei</i>                                         |  | <b>Euryarchaeota</b><br><b>Methanomicrobia</b>       |
| <i>Methermicoccus shengliensis</i>                                    |  | <b>Euryarchaeota</b><br><b>Methanomicrobia</b>       |
| <i>Methanosarcinales archaeon ex4484_138</i> (GoM-ArcI)               |  | <b>Euryarchaeota</b><br><b>Methanomicrobia</b>       |
| <i>Methanosarcinales archaeon ex4572_44</i> (GoM-ArcI)                |  | <b>Euryarchaeota</b><br><b>Methanomicrobia</b>       |
| <i>Candidatus Syntrophoarchaeum caldarius</i> (ANME-2 - GoM-Arch87-2) |  | <b>Euryarchaeota</b><br><b>Methanomicrobia</b>       |
| ANME-2 cluster archaeon HR1                                           |  | <b>Euryarchaeota</b><br><b>Methanomicrobia</b>       |
| ANME-1 cluster archaeon ex4572_4                                      |  | <b>Euryarchaeota</b><br><b>Methanomicrobia</b>       |
| Arc I group archaeon U1Isi0528_Bin055                                 |  | <b>Euryarchaeota</b><br><b>Methanomicrobia</b>       |
| <i>Methanonatronarchaeum thermophilum</i>                             |  | <b>Euryarchaeota</b><br><b>Methanonatronarchaeia</b> |
| <i>Methanopyrus kandleri</i> AV19                                     |  | <b>Euryarchaeota</b><br><b>Methanopyri</b>           |
| <i>Methanopyrus KOL6</i>                                              |  | <b>Euryarchaeota</b><br><b>Methanopyri</b>           |
| <i>Theionarchaea archaeon DG-70-1</i>                                 |  | <b>Euryarchaeota</b><br><b>Theionarchaea</b>         |

|                                                      |  |                                                    |
|------------------------------------------------------|--|----------------------------------------------------|
| <i>Theionarchaea archaeon DG-70</i>                  |  | <b>Euryarchaeota<br/>Theionarchaea</b>             |
| <i>Pyrococcus furiosus</i>                           |  | <b>Euryarchaeota<br/>Thermococci</b>               |
| <i>Pyrococcus abyssi</i>                             |  | <b>Euryarchaeota<br/>Thermococci</b>               |
| <i>Pyrococcus horikoshii</i>                         |  | <b>Euryarchaeota<br/>Thermococci</b>               |
| <i>Thermococcus kodakarensis</i>                     |  | <b>Euryarchaeota<br/>Thermococci</b>               |
| <i>Methanomassiliicoccus luminyensis</i>             |  | <b>Euryarchaeota<br/>Thermoplasmata</b>            |
| <i>Candidatus Methanomassiliicoccus intestinalis</i> |  | <b>Euryarchaeota<br/>Thermoplasmata</b>            |
| <i>Candidatus Methanoplasma termitum</i>             |  | <b>Euryarchaeota<br/>Thermoplasmata</b>            |
| <i>Acidiplasma aeolicum</i>                          |  | <b>Euryarchaeota<br/>Thermoplasmata</b>            |
| <i>Ferroplasma acidarmanus fer1</i>                  |  | <b>Euryarchaeota<br/>Thermoplasmata</b>            |
| <i>Picrophilus torridus</i>                          |  | <b>Euryarchaeota<br/>Thermoplasmata</b>            |
| <i>Thermoplasma volcanium</i>                        |  | <b>Euryarchaeota<br/>Thermoplasmata</b>            |
| <i>Thermoplasmatales archaeon SCGC AB-539-N05</i>    |  | <b>Euryarchaeota<br/>Thermoplasmata</b>            |
| <i>Thermoplasmatales archaeon B_DKE</i>              |  | <b>Euryarchaeota<br/>Thermoplasmata</b>            |
| <i>Cuniculiplasma sp. C_DKE</i>                      |  | <b>Euryarchaeota<br/>Thermoplasmata</b>            |
| <i>uncultured marine group II euryarchaeote</i>      |  | <b>Euryarchaeota<br/>unclassified</b>              |
| <i>Marine group III euryarchaeote CG-Epi2</i>        |  | <b>Euryarchaeota<br/>unclassified</b>              |
| <i>MSBL1 archaeon SCGC-AAA259E19</i>                 |  | <b>Euryarchaeota<br/>unclassified</b>              |
|                                                      |  |                                                    |
| <i>MCG-1</i>                                         |  | <b>TACK group Candidatus<br/>Bathyarchaeota</b>    |
| <i>MCG-6</i>                                         |  | <b>TACK group Candidatus<br/>Bathyarchaeota</b>    |
| <i>MCG-15</i>                                        |  | <b>TACK group Candidatus<br/>Bathyarchaeota</b>    |
| <i>Candidatus Bathyarchaeota archaeon BA2</i>        |  | <b>TACK group Candidatus<br/>Bathyarchaeota</b>    |
| <i>Geothermarchaeota (ex4572_27)</i>                 |  | <b>TACK group Candidatus<br/>Geothermarchaeota</b> |

|                                              |  |                                                  |
|----------------------------------------------|--|--------------------------------------------------|
| <i>Candidatus Korarchaeum cryptofilum</i>    |  | <b>TACK group Candidatus Korarchaeota</b>        |
| <i>Methanomethylicus mesodigestum</i> V2     |  | <b>TACK group Candidatus Verstraetearchaeota</b> |
| <i>Methanosuratus petracarbonis</i> V4       |  | <b>TACK group Candidatus Verstraetearchaeota</b> |
| <i>Acidilobus saccharovorans</i>             |  | <b>TACK group Crenarchaeota</b>                  |
| <i>Aeropyrum camini</i>                      |  | <b>TACK group Crenarchaeota</b>                  |
| <i>Aeropyrum pernix</i> (K1)                 |  | <b>TACK group Crenarchaeota</b>                  |
| <i>Hyperthermus butylicus</i>                |  | <b>TACK group Crenarchaeota</b>                  |
| <i>Ignisphaera aggregans</i> (DSM 17230)     |  | <b>TACK group Crenarchaeota</b>                  |
| <i>Ignicoccus hospitalis</i>                 |  | <b>TACK group Crenarchaeota</b>                  |
| <i>Ignicoccus islandicus</i> (DSM 13165)     |  | <b>TACK group Crenarchaeota</b>                  |
| <i>Staphylothermus marinus</i>               |  | <b>TACK group Crenarchaeota</b>                  |
| <i>Fervidicoccus fontis</i>                  |  | <b>TACK group Crenarchaeota</b>                  |
| <i>Sulfolobus solfataricus</i>               |  | <b>TACK group Crenarchaeota</b>                  |
| <i>Caldivirga maquilingensis</i>             |  | <b>TACK group Crenarchaeota</b>                  |
| <i>Pyrobaculum aerophilum</i> (str. IM2)     |  | <b>TACK group Crenarchaeota</b>                  |
| <i>Thermofilum pendens</i>                   |  | <b>TACK group Crenarchaeota</b>                  |
| <i>Candidatus Caldiarchaeum subterraneum</i> |  | <b>TACK group Aigarchaeota</b>                   |
| <i>Cenarchaeum symbiosum</i> A               |  | <b>TACK group Thaumarchaeota</b>                 |
| <i>Nitrosopumilus koreensis</i>              |  | <b>TACK group Thaumarchaeota</b>                 |
| <i>Nitrosopumilus maritimus</i> SCM1         |  | <b>TACK group Thaumarchaeota</b>                 |
| <i>Nitrosopumilus limnia</i>                 |  | <b>TACK group Thaumarchaeota</b>                 |
| <i>Candidatus Nitrosomarinus catalina</i>    |  | <b>TACK group Thaumarchaeota</b>                 |
| <i>Candidatus Nitrososphaera gargensis</i>   |  | <b>TACK group Thaumarchaeota</b>                 |
| <i>Candidatus Nitrocosmicus oleophilus</i>   |  | <b>TACK group Thaumarchaeota</b>                 |



|                                                                                 |  |                                      |
|---------------------------------------------------------------------------------|--|--------------------------------------|
| <i>Candidatus Nitrosocaldus islandicus</i>                                      |  | <b>TACK group<br/>Thaumarchaeota</b> |
| <i>Marine group I thaumarchaeote SCGC<br/>RSA3</i>                              |  | <b>TACK group<br/>Thaumarchaeota</b> |
| <i>Thaumarchaeota archaeon SCGC<br/>AB-539-E09</i>                              |  | <b>TACK group<br/>Thaumarchaeota</b> |
| <i>Thaumarchaeota archaeon BS4<br/>(Candidatus Nitrosocaldus cavascurensis)</i> |  | <b>TACK group<br/>Thaumarchaeota</b> |
| <i>Thaumarchaeota Fn1</i>                                                       |  | <b>TACK group<br/>Thaumarchaeota</b> |
|                                                                                 |  |                                      |
| <i>Candidatus Marsarchaeota G2 archaeon<br/>BE_D</i>                            |  | <b>unclassified</b>                  |
| <i>Candidatus Marsarchaeota G1 archaeon<br/>OSP_C</i>                           |  | <b>unclassified</b>                  |
|                                                                                 |  |                                      |

**Table S2: BUSCO analysis for *P. keilini* and selected other parabasalids and metamonads.**

| Phylum       | Species                                       | Data type     | Complete | Fragmented | Missing | Source                                    |
|--------------|-----------------------------------------------|---------------|----------|------------|---------|-------------------------------------------|
| Anaeramoebae | <i>Anaeramoeba<br/>flamelloides</i>           | genome        | 47       | 26         | 27      | (Stairs et al.,<br>2021)                  |
| Anaeramoebae | <i>Anaeramoeba<br/>ignava</i>                 | genome        | 61       | 15         | 24      | (Stairs et al.,<br>2021)                  |
| Fornicata    | <i>Dysnectes brevis</i>                       | transcriptome | 42       | 14         | 44      | PRJNA315708                               |
| Fornicata    | <i>Giardia intestinalis<br/>(2020)</i>        | genome        | 24       | 6          | 70      | (Stairs et al.,<br>2021)                  |
| Fornicata    | <i>Kipferlia bialata</i>                      | genome        | 39       | 11         | 50      | (Tanifuji et al.,<br>2018),<br>PRJDB5223  |
| Fornicata    | <i>Trepomonas sp.</i>                         | transcriptome | 20       | 6          | 74      | (Stairs et al.,<br>2021)                  |
| Parabasalia  | <i>Cononympha_leidyi<br/>(3 single cells)</i> | transcriptome | 22       | 10         | 68      | (Nishimura et<br>al., 2020),<br>PRJDB8546 |
| Parabasalia  | <i>Dientamoeba fragilis</i>                   | transcriptome | 49       | 13         | 38      | (Barratt et al.,<br>2015),<br>PRJNA284312 |
| Parabasalia  | <i>Histomonas<br/>meleagridis</i>             | transcriptome | 49       | 8          | 43      | PRJEB19109                                |

|                |                                                     |               |    |    |    |                                         |
|----------------|-----------------------------------------------------|---------------|----|----|----|-----------------------------------------|
| Parabasalialia | <i>Holomastigotoides hartmanni</i> (3 single cells) | transcriptome | 19 | 13 | 68 | (Nishimura et al., 2020), PRJDB8546     |
| Parabasalialia | <i>Holomastigotoides minor</i> (3 single cells)     | transcriptome | 20 | 12 | 68 | (Nishimura et al., 2020), PRJDB8546     |
| Parabasalialia | <i>Pentatrichomonas hominis</i>                     | transcriptome | 50 | 8  | 42 | (Handrich et al., 2019), PRJNA340083    |
| Parabasalialia | <i>Pseudotrichomonas keilini</i>                    | transcriptome | 47 | 11 | 42 | this study                              |
| Parabasalialia | <i>Pseudotrichonympha grassi</i> (3 single cells)   | transcriptome | 36 | 8  | 56 | (Nishimura et al., 2020), PRJDB8546     |
| Parabasalialia | <i>Trichomitus batrachorum</i>                      | transcriptome | 47 | 10 | 43 | (Handrich et al., 2019), PRJNA340083    |
| Parabasalialia | <i>Trichomonas gallinae</i>                         | transcriptome | 43 | 9  | 48 | (Handrich et al., 2019), PRJNA340083    |
| Parabasalialia | <i>Trichomonas tenax</i>                            | transcriptome | 48 | 8  | 44 | (Handrich et al., 2019), PRJNA340083    |
| Parabasalialia | <i>Trichomonas vaginalis</i>                        | transcriptome | 53 | 6  | 41 | (Stairs et al., 2021), PRJNA938429      |
| Parabasalialia | <i>Tritrichomonas foetus</i>                        | transcriptome | 49 | 6  | 45 | (Morin-Adeline et al., 2014), SRX540117 |
| Preaxostyla    | <i>Monocercomonoides exilis</i>                     | genome        | 55 | 8  | 37 | (Stairs et al., 2021)                   |

**Table S3: List of proteins on the hydrogenosome surface.**

| <b>Protein Accession Number</b> | <b>gene_ID</b>  | <b>P_keilini protein header</b> | <b>function</b>                           |
|---------------------------------|-----------------|---------------------------------|-------------------------------------------|
| XP_001323739.1                  | TVAG_005<br>910 | Pkeilini_DN667_c0_g2_i1.p1      | 50S-ribosomal-protein-L2,-putative        |
| XP_001323765.1                  | TVAG_006<br>170 | Pkeilini_DN989_c0_g1_i1.p1      | 60S-ribosomal-protein-L19,-putative       |
| XP_001323773.1                  | TVAG_006<br>250 | Pkeilini_DN915_c0_g1_i1.p1      | 30S-ribosomal-protein-S8,-putative        |
| XP_001311950.1                  | TVAG_008<br>680 | Pkeilini_DN1020_c0_g1_i1.p1     | tubulin-epsilon-chain,-putative           |
| XP_001582527.1                  | TVAG_013<br>060 | Pkeilini_DN4044_c0_g1_i1.p1     | 60S-ribosomal-protein-L3,-putative        |
| XP_001582635.1                  | TVAG_014<br>160 | Pkeilini_DN645_c0_g1_i1.p2      | 60S-ribosomal-protein-L12,-putative       |
| XP_001329886.1                  | TVAG_015<br>800 | Pkeilini_DN460_c0_g1_i2.p1      | 60S-ribosomal-protein-L23,-putative       |
| XP_001317481.1                  | TVAG_020<br>040 | Pkeilini_DN3914_c0_g3_i1.p1     | ribosomal-protein-S9,-putative            |
| XP_001314734.1                  | TVAG_020<br>480 | Pkeilini_DN508_c0_g2_i1.p1      | 40S-ribosomal-protein-S18,-putative       |
| XP_001300897.1                  | TVAG_033<br>590 | Pkeilini_DN670_c0_g1_i1.p1      | 40S-ribosomal-protein-S6,-putative        |
| XP_001326922.1                  | TVAG_038<br>050 | Pkeilini_DN414_c0_g1_i2.p1      | 50S-ribosomal-protein-L24p,-putative      |
| XP_001315155.1                  | TVAG_040<br>820 | Pkeilini_DN16934_c0_g1_i1.p2    | 40S-ribosomal-protein-S17,-putative       |
| XP_001301101.1                  | TVAG_041<br>350 | Pkeilini_DN3310_c1_g1_i1.p1     | 30S-40S-ribosomal-protein,-putative       |
| XP_001312328.1                  | TVAG_043<br>060 | Pkeilini_DN163620_c0_g1_i1.p1   | fructose-bisphosphate-aldolase,-putative  |
| XP_001315627.1                  | TVAG_043<br>500 | Pkeilini_DN242_c0_g2_i1.p1      | enolase,-putative                         |
| XP_001314691.1                  | TVAG_044<br>510 | Pkeilini_DN842_c0_g2_i4.p1      | heat-shock-protein-70-(HSP70)-4,-putative |
| XP_001330678.1                  | TVAG_044<br>560 | Pkeilini_DN374_c0_g1_i1.p1      | 50S-ribosomal-protein-L5p,-putative       |
| XP_001323300.1                  | TVAG_045<br>010 | Pkeilini_DN206053_c0_g1_i1.p1   | glucokinase,-putative                     |

|                |                 |                               |                                                          |
|----------------|-----------------|-------------------------------|----------------------------------------------------------|
| XP_001308576.1 | TVAG_045<br>340 | Pkeilini_DN420_c0_g1_i1.p1    | polyadenylate-binding-protein,-putative                  |
| XP_001298952.1 | TVAG_047<br>460 | Pkeilini_DN207414_c0_g1_i1.p1 | 40S-ribosomal-protein-S3a,-putative                      |
| XP_001321104.1 | TVAG_051<br>160 | Pkeilini_DN182683_c0_g1_i1.p1 | 60S-acidic-ribosomal-protein-P0,-putative                |
| XP_001306738.1 | TVAG_054<br>130 | Pkeilini_DN92336_c3_g1_i1.p1  | 60S-ribosomal-protein-L7,-putative                       |
| XP_001330619.1 | TVAG_054<br>500 | Pkeilini_DN198864_c0_g1_i1.p1 | 50S-ribosomal-protein-L6p,-putative                      |
| XP_001308434.1 | TVAG_054<br>830 | Pkeilini_DN184234_c0_g1_i1.p1 | phosphoglucomutase,-putative                             |
| XP_001323508.1 | TVAG_061<br>890 | Pkeilini_DN161037_c0_g1_i1.p1 | 60S-ribosomal-protein-L18a,-putative                     |
| XP_001323512.1 | TVAG_061<br>930 | Pkeilini_DN218798_c0_g1_i1.p1 | glucose-6-phosphate-isomerase,-putative                  |
| XP_001320140.1 | TVAG_064<br>640 | Pkeilini_DN170420_c1_g1_i4.p1 | ribosomal-protein-L5,-putative                           |
| XP_001318569.1 | TVAG_066<br>030 | Pkeilini_DN1889_c0_g1_i1.p1   | 40S-ribosomal-protein-S8,-putative                       |
| XP_001328958.1 | TVAG_067<br>400 | Pkeilini_DN828_c0_g1_i2.p1    | elongation-factor-1-alpha,-putative                      |
| XP_001584514.1 | TVAG_071<br>920 | Pkeilini_DN103_c0_g1_i1.p1    | 40S-ribosomal-protein-S23,-putative                      |
| XP_001321243.1 | TVAG_073<br>860 | Pkeilini_DN2499_c0_g3_i2.p1   | phosphoenolpyruvate-protein-phosphotransferase,-putative |
| XP_001324843.1 | TVAG_074<br>480 | Pkeilini_DN283_c0_g1_i2.p1    | 60S-ribosomal-protein-L10a,-putative                     |
| XP_001324856.1 | TVAG_074<br>610 | Pkeilini_DN1754_c0_g1_i2.p1   | 60S-ribosomal-protein-L10,-putative                      |
| XP_001320891.1 | TVAG_079<br>260 | Pkeilini_DN9_c0_g1_i2.p1      | phosphofructokinase,-putative                            |
| XP_001579459.1 | TVAG_083<br>260 | Pkeilini_DN570_c0_g4_i1.p1    | 60S-ribosomal-protein-L17,-putative                      |
| XP_001318159.1 | TVAG_087<br>140 | Pkeilini_DN173700_c0_g1_i1.p1 | arp2/3,-putative                                         |
| XP_001304619.1 | TVAG_092<br>750 | Pkeilini_DN690_c0_g1_i1.p1    | glucokinase                                              |
| XP_001303733.1 | TVAG_094<br>720 | Pkeilini_DN605_c0_g1_i1.p2    | 60S-ribosomal-protein-L34,-putative                      |

|                |                 |                                   |                                                        |
|----------------|-----------------|-----------------------------------|--------------------------------------------------------|
| XP_001321933.1 | TVAG_098<br>450 | Pkeilini_DN218705_c0_g1_i1.p<br>1 | 40S-ribosomal-protein-S4,-putative                     |
| XP_001303193.1 | TVAG_099<br>490 | Pkeilini_DN184416_c0_g1_i1.p<br>1 | glucose-kinase,-putative                               |
| XP_001580437.1 | TVAG_101<br>690 | Pkeilini_DN165121_c0_g1_i1.p<br>1 | 60S-ribosomal-protein-L24,-putative                    |
| XP_001324008.1 | TVAG_106<br>800 | Pkeilini_DN1152_c0_g1_i1.p1       | 30S-ribosomal-protein-S3,-putative                     |
| XP_001581388.1 | TVAG_110<br>140 | Pkeilini_DN167_c0_g3_i5.p2        | ubiquitin,-putative                                    |
| XP_001300910.1 | TVAG_112<br>230 | Pkeilini_DN79301_c0_g2_i1.p1      | 60S-ribosomal-protein-L13,-putative                    |
| XP_001579013.1 | TVAG_113<br>710 | Pkeilini_DN54853_c0_g1_i1.p2      | phosphoglycerate-mutase,-putative                      |
| XP_001324949.1 | TVAG_117<br>480 | Pkeilini_DN330_c0_g1_i3.p1        | 30S-ribosomal-protein-S11,-putative                    |
| XP_001276845.1 | TVAG_119<br>330 | Pkeilini_DN19_c0_g6_i1.p1         | 60S-ribosomal-protein-L21,-putative                    |
| XP_001276908.1 | TVAG_119<br>970 | Pkeilini_DN208907_c0_g1_i1.p<br>1 | conserved-hypothetical-protein                         |
| XP_001276929.1 | TVAG_120<br>180 | Pkeilini_DN9217_c0_g1_i1.p1       | 40S-ribosomal-protein-S10,-putative                    |
| XP_001277020.1 | TVAG_121<br>100 | Pkeilini_DN426_c0_g1_i2.p1        | 60S-ribosomal-protein-L18,-putative                    |
| XP_001322974.1 | TVAG_121<br>550 | Pkeilini_DN1040_c0_g1_i1.p1       | 60S-ribosomal-protein-L27a,-putative                   |
| XP_001324688.1 | TVAG_128<br>790 | Pkeilini_DN68345_c0_g1_i2.p1      | 60S-ribosomal-protein-L4,-putative                     |
| XP_001324775.1 | TVAG_139<br>320 | Pkeilini_DN43315_c0_g1_i1.p1      | heat-shock-protein,-putative                           |
| XP_001320113.1 | TVAG_142<br>440 | Pkeilini_DN3544_c0_g1_i2.p1       | 40S-ribosomal-protein-S2,-putative                     |
| XP_001579934.1 | TVAG_146<br>910 | Pkeilini_DN183802_c0_g1_i1.p<br>1 | glyceraldehyde-3-phosphate-dehydrog<br>enase,-putative |
| XP_001309550.1 | TVAG_148<br>950 | Pkeilini_DN639_c0_g1_i1.p1        | 50S-ribosomal-protein-L15e,-putative                   |
| XP_001309564.1 | TVAG_149<br>090 | Pkeilini_DN976_c0_g2_i4.p1        | actin,-putative                                        |
| XP_001303635.1 | TVAG_152<br>720 | Pkeilini_DN330_c0_g1_i3.p1        | 40S-ribosomal-protein-S14,-putative                    |

|                |                 |                               |                                                                          |
|----------------|-----------------|-------------------------------|--------------------------------------------------------------------------|
| XP_001317545.1 | TVAG_153<br>560 | Pkeilini_DN358_c0_g1_i4.p1    | heat-shock-protein,-putative                                             |
| XP_001313895.1 | TVAG_154<br>680 | Pkeilini_DN5492_c0_g1_i1.p1   | conserved-hypothetical-protein                                           |
| XP_001310739.1 | TVAG_157<br>940 | Pkeilini_DN5492_c0_g1_i1.p1   | conserved-hypothetical-protein                                           |
| XP_001580742.1 | TVAG_178<br>000 | Pkeilini_DN52_c0_g1_i2.p1     | 60S-ribosomal-protein-L23a,-putative                                     |
| XP_001583987.1 | TVAG_182<br>370 | Pkeilini_DN69_c0_g3_i2.p1     | chaperonin-containing-t-complex-protein-1,-gamma-subunit,-tcpg,-putative |
| XP_001584002.1 | TVAG_182<br>520 | Pkeilini_DN79301_c0_g2_i1.p1  | 60S-ribosomal-protein-L13,-putative                                      |
| XP_001580136.1 | TVAG_190<br>450 | Pkeilini_DN1019_c0_g1_i1.p1   | kakapo,-putative                                                         |
| XP_001320814.1 | TVAG_191<br>140 | Pkeilini_DN528_c0_g1_i1.p1    | conserved-hypothetical-protein                                           |
| XP_001581272.1 | TVAG_192<br>620 | Pkeilini_DN206419_c0_g1_i1.p1 | actin-depolymerizing-factor,-putative                                    |
| XP_001308024.1 | TVAG_204<br>360 | Pkeilini_DN168_c0_g2_i1.p1    | malate-dehydrogenase,-putative                                           |
| XP_001308025.1 | TVAG_204<br>370 | Pkeilini_DN206053_c0_g1_i1.p1 | glucokinase,-putative                                                    |
| XP_001303801.1 | TVAG_205<br>910 | Pkeilini_DN184234_c0_g1_i1.p1 | phosphoglucomutase,-putative                                             |
| XP_001319786.1 | TVAG_212<br>020 | Pkeilini_DN5548_c1_g1_i1.p1   | transketolase,-putative                                                  |
| XP_001325073.1 | TVAG_222<br>040 | Pkeilini_DN5492_c0_g1_i1.p1   | conserved-hypothetical-protein                                           |
| XP_001310373.1 | TVAG_226<br>870 | Pkeilini_DN5492_c0_g1_i1.p1   | conserved-hypothetical-protein                                           |
| XP_001303253.1 | TVAG_234<br>160 | Pkeilini_DN219244_c0_g1_i1.p1 | arp2/3-complex-20-kD-subunit,-putative                                   |
| XP_001581543.1 | TVAG_239<br>310 | Pkeilini_DN1019_c0_g2_i2.p1   | bollus-pemphigoid-antigen,-putative                                      |
| XP_001320867.1 | TVAG_240<br>050 | Pkeilini_DN516_c0_g1_i1.p1    | 40S-ribosomal-protein-sa,-putative                                       |
| XP_001323701.1 | TVAG_248<br>450 | Pkeilini_DN1700_c0_g1_i1.p1   | peptidyl-tRNA-hydrolase,-putative                                        |
| XP_001579239.1 | TVAG_253<br>650 | Pkeilini_DN168_c0_g2_i1.p1    | malate-dehydrogenase,-putative                                           |

|                |                 |                               |                                                               |
|----------------|-----------------|-------------------------------|---------------------------------------------------------------|
| XP_001323043.1 | TVAG_258<br>220 | Pkeilini_DN7684_c0_g1_i1.p1   | glycosyltransferase,-putative                                 |
| XP_001317828.1 | TVAG_263<br>740 | Pkeilini_DN242_c0_g1_i2.p1    | enolase,-putative                                             |
| XP_001313821.1 | TVAG_265<br>950 | Pkeilini_DN56722_c0_g1_i1.p1  | 60S-ribosomal-protein-L32,-putative                           |
| XP_001579758.1 | TVAG_268<br>050 | Pkeilini_DN220_c0_g1_i1.p1    | phosphoglycerate-kinase,-putative                             |
| XP_001330352.1 | TVAG_272<br>970 | Pkeilini_DN362_c0_g1_i1.p1    | 40S-ribosomal-protein-S24,-putative                           |
| XP_001321781.1 | TVAG_276<br>310 | Pkeilini_DN217279_c1_g1_i1.p1 | starch-branching-enzyme-II,-putative                          |
| XP_001321791.1 | TVAG_276<br>410 | Pkeilini_DN3469_c0_g2_i1.p1   | translation-elongation-factor,-putative                       |
| XP_001304599.1 | TVAG_277<br>390 | Pkeilini_DN160592_c0_g1_i1.p2 | peptidyl-prolyl-cis-trans-isomerase-A,-putative               |
| XP_001582074.1 | TVAG_282<br>580 | Pkeilini_DN52882_c0_g1_i1.p1  | conserved-hypothetical-protein                                |
| XP_001582118.1 | TVAG_283<br>020 | Pkeilini_DN587_c0_g1_i1.p1    | initiation-factor-5A,-putative                                |
| XP_001330357.1 | TVAG_292<br>580 | Pkeilini_DN16084_c3_g1_i1.p1  | immunophilin,-putative                                        |
| XP_001307577.1 | TVAG_293<br>770 | Pkeilini_DN160642_c0_g1_i1.p1 | phosphofructokinase,-putative                                 |
| XP_001315498.1 | TVAG_299<br>380 | Pkeilini_DN330_c0_g1_i3.p1    | 30S-ribosomal-protein-S11,-putative                           |
| XP_001311055.1 | TVAG_300<br>000 | Pkeilini_DN163620_c0_g1_i1.p1 | fructose-bisphosphate-aldolase,-putative                      |
| XP_001304306.1 | TVAG_319<br>220 | Pkeilini_DN362_c0_g2_i1.p1    | 40S-ribosomal-protein-S24,-putative                           |
| XP_001322282.1 | TVAG_329<br>460 | Pkeilini_DN242_c0_g2_i1.p1    | enolase,-putative                                             |
| XP_001317525.1 | TVAG_336<br>940 | Pkeilini_DN690_c0_g1_i1.p1    | glucokinase,-putative                                         |
| XP_001319342.1 | TVAG_342<br>830 | Pkeilini_DN330_c0_g1_i3.p1    | 40S-ribosomal-protein-S14/30S-ribosomal-protein-S11,-putative |
| XP_001328722.1 | TVAG_348<br>090 | Pkeilini_DN207414_c0_g1_i1.p1 | 40S-ribosomal-protein-S3a,-putative                           |
| XP_001328746.1 | TVAG_348<br>330 | Pkeilini_DN921_c0_g2_i1.p1    | glycogen-phosphorylase,-putative                              |

|                |                 |                               |                                               |
|----------------|-----------------|-------------------------------|-----------------------------------------------|
| XP_001326306.1 | TVAG_351<br>310 | Pkeilini_DN351_c0_g1_i1.p1    | plastin,-putative                             |
| XP_001308720.1 | TVAG_354<br>020 | Pkeilini_DN160502_c0_g1_i1.p1 | contractin,-putative                          |
| XP_001307153.1 | TVAG_360<br>700 | Pkeilini_DN163620_c0_g1_i1.p1 | fructose-bisphosphate-aldolase,-putative      |
| XP_001307814.1 | TVAG_370<br>550 | Pkeilini_DN670_c0_g1_i1.p1    | 40S-ribosomal-protein-S6,-putative            |
| XP_001305702.1 | TVAG_373<br>720 | Pkeilini_DN2724_c0_g1_i10.p2  | pyruvate-kinase,-putative                     |
| XP_001306345.1 | TVAG_376<br>130 | Pkeilini_DN16874_c0_g1_i1.p3  | gelsolin,-putative                            |
| XP_001304373.1 | TVAG_380<br>910 | Pkeilini_DN600_c0_g3_i1.p1    | DEAD-box-ATP-dependent-RNA-helicase,-putative |
| XP_001295243.1 | TVAG_381<br>030 | Pkeilini_DN382_c0_g1_i1.p1    | conserved-hypothetical-protein                |
| XP_001302740.1 | TVAG_381<br>690 | Pkeilini_DN208349_c0_g1_i1.p1 | NAD-dependent-epimerase/dehydratase,-putative |
| XP_001314248.1 | TVAG_383<br>940 | Pkeilini_DN220_c0_g1_i1.p1    | phosphoglycerate-kinase,-putative             |
| XP_001581778.1 | TVAG_391<br>760 | Pkeilini_DN450_c0_g1_i1.p2    | phosphofructokinase,-putative                 |
| XP_001327217.1 | TVAG_397<br>250 | Pkeilini_DN690_c0_g1_i1.p1    | glucokinase,-putative                         |
| XP_001328502.1 | TVAG_423<br>320 | Pkeilini_DN79301_c0_g2_i1.p1  | 60S-ribosomal-protein-L13,-putative           |
| XP_001325139.1 | TVAG_430<br>830 | Pkeilini_DN9_c0_g1_i2.p1      | phosphofructokinase,-putative                 |
| XP_001302863.1 | TVAG_435<br>000 | Pkeilini_DN16084_c3_g1_i1.p1  | conserved-hypothetical-protein                |
| XP_001313948.1 | TVAG_442<br>070 | Pkeilini_DN184416_c0_g1_i1.p1 | glucose-kinase,-putative                      |
| XP_001579592.1 | TVAG_462<br>920 | Pkeilini_DN160642_c0_g1_i1.p1 | phosphofructokinase,-putative                 |
| XP_001325501.1 | TVAG_464<br>120 | Pkeilini_DN330_c0_g1_i1.p1    | 30S-ribosomal-protein-S11,-putative           |
| XP_001325506.1 | TVAG_464<br>170 | Pkeilini_DN242_c0_g2_i1.p1    | enolase,-putative                             |
| XP_001322192.1 | TVAG_482<br>430 | Pkeilini_DN426_c0_g1_i2.p1    | 60S-ribosomal-protein-L18,-putative           |



|                |                 |                                   |                               |
|----------------|-----------------|-----------------------------------|-------------------------------|
| XP_001322532.1 | TVAG_491<br>670 | Pkeilini_DN207881_c0_g1_i1.p<br>1 | malic-enzyme,-putative        |
| XP_001305512.1 | TVAG_496<br>160 | Pkeilini_DN211320_c0_g1_i1.p<br>1 | phosphofructokinase,-putative |

**Table S4: List of putative membrane proteins, enzymes and hypothetical proteins identified in the hydrogenosome**

| Protein Accession Number | gene_ID     | P_keilini protein header      | function                                           |
|--------------------------|-------------|-------------------------------|----------------------------------------------------|
| XP_001584373.1           | TVAG_070500 | Pkeilini_DN58243_c4_g1_i1.p1  | Rab7g-protein,-putative                            |
| XP_001584268.1           | TVAG_185900 | Pkeilini_DN211195_c0_g1_i1.p1 | conserved-hypothetical-protein                     |
| XP_001584214.1           | TVAG_185340 | Pkeilini_DN171252_c0_g1_i1.p1 | Rab32,-putative                                    |
| XP_001584210.1           | TVAG_185300 | Pkeilini_DN25505_c0_g1_i1.p1  | Rab11,-putative                                    |
| XP_001584188.1           | TVAG_185080 | Pkeilini_DN175067_c0_g1_i1.p1 | ran,-putative                                      |
| XP_001584134.1           | TVAG_183850 | Pkeilini_DN5301_c0_g1_i1.p1   | conserved-hypothetical-protein                     |
| XP_001584128.1           | TVAG_183790 | Pkeilini_DN568_c0_g1_i1.p1    | malic-enzyme,-putative                             |
| XP_001584099.1           | TVAG_183500 | Pkeilini_DN541_c0_g1_i1.p1    | succinate-thiokinase- $\zeta$ -subunit             |
| XP_001584080.1           | TVAG_183300 | Pkeilini_DN194471_c0_g1_i1.p1 | aminotransferase-class-V,-putative                 |
| XP_001584012.1           | TVAG_182620 | Pkeilini_DN13155_c3_g1_i1.p1  | nitrate,-fromate,-iron-dehydrogenase,-putative     |
| XP_001583906.1           | TVAG_076670 | Pkeilini_DN1671_c1_g1_i1.p1   | small-GTPase-RAB,-putative                         |
| XP_001583890.1           | TVAG_076510 | Pkeilini_DN175_c0_g1_i1.p1    | 2-amino-3-ketobutyrate-coenzyme-A-ligase,-putative |
| XP_001583862.1           | TVAG_076230 | Pkeilini_DN584_c0_g1_i1.p1    | nucleotide-binding-protein,-putative               |
| XP_001583785.1           | TVAG_075460 | Pkeilini_DN206_c3_g1_i1.p1    | Rab5b,-putative                                    |

|                |             |                               |                                                         |
|----------------|-------------|-------------------------------|---------------------------------------------------------|
| XP_001583584.1 | TVAG_036230 | Pkeilini_DN26_c4_g1_i1.p1     | RAB,-putative                                           |
| XP_001583562.1 | TVAG_036010 | Pkeilini_DN160973_c0_g1_i1.p1 | A-type-flavoprotein                                     |
| XP_001583303.1 | TVAG_377960 | Pkeilini_DN26_c4_g1_i1.p1     | Rab8,-putative                                          |
| XP_001583118.1 | TVAG_093060 | Pkeilini_DN877_c0_g2_i1.p1    | Rabx30-protein,-putative                                |
| XP_001583042.1 | TVAG_456910 | Pkeilini_DN941_c2_g5_i1.p1    | Rabx32-protein,-putative                                |
| XP_001583028.1 | TVAG_456770 | Pkeilini_DN419_c0_g1_i1.p2    | iron-sulfur-cluster-assembly-protein,-putative          |
| XP_001582848.1 | TVAG_249220 | Pkeilini_DN953_c0_g3_i1.p1    | Rab2,-putative                                          |
| XP_001582728.1 | TVAG_237680 | Pkeilini_DN208767_c1_g1_i1.p1 | ADP,ATP-carrier-protein,-putative                       |
| XP_001582674.1 | TVAG_237140 | Pkeilini_DN842_c0_g4_i1.p1    | heat-shock-protein,-putative                            |
| XP_001582391.1 | TVAG_198430 | Pkeilini_DN195283_c0_g1_i1.p1 | 14-3-3-protein-sigma,-gamma,-zeta,-beta/alpha,-putative |
| XP_001582383.1 | TVAG_198350 | Pkeilini_DN6701_c0_g1_i1.p2   | hypothetical-protein                                    |
| XP_001582360.1 | TVAG_198110 | Pkeilini_DN688_c0_g3_i1.p1    | pyruvate-flavodoxin-oxidoreductase,-putative            |
| XP_001582336.1 | TVAG_167250 | Pkeilini_DN392_c0_g1_i1.p1    | chaperonin,-putative                                    |
| XP_001582335.1 | TVAG_167240 | Pkeilini_DN16677_c0_g1_i1.p1  | conserved-hypothetical-protein                          |
| XP_001582155.1 | TVAG_283380 | Pkeilini_DN2717_c0_g1_i1.p1   | conserved-hypothetical-protein                          |
| XP_001581795.1 | TVAG_391930 | Pkeilini_DN184428_c0_g1_i1.p1 | RAB,-putative                                           |
| XP_001581497.1 | TVAG_238830 | Pkeilini_DN568_c0_g1_i1.p1    | malic-enzyme,-putative                                  |
| XP_001581254.1 | TVAG_192440 | Pkeilini_DN941_c3_g1_i1.p1    | RAC,-putative                                           |
| XP_001580948.1 | TVAG_402160 | Pkeilini_DN21606_c0_g1_i1.p1  | guanine-nucleotide-exchange-factor,-putative            |
| XP_001580911.1 | TVAG_130330 | Pkeilini_DN22962_c0_g1_i1.p1  | conserved-hypothetical-protein                          |

|                |             |                               |                                                             |
|----------------|-------------|-------------------------------|-------------------------------------------------------------|
| XP_001580780.1 | TVAG_178380 | Pkeilini_DN160711_c0_g1_i1.p1 | conserved-hypothetical-protein                              |
| XP_001580752.1 | TVAG_178100 | Pkeilini_DN194385_c0_g1_i1.p1 | hypothetical-protein                                        |
| XP_001580745.1 | TVAG_178030 | Pkeilini_DN160251_c0_g1_i1.p1 | plasma-membrane-calcium-transporting-ATPase,-putative       |
| XP_001580733.1 | TVAG_177910 | Pkeilini_DN1508_c0_g1_i1.p1   | hypothetical-protein                                        |
| XP_001580703.1 | TVAG_433130 | Pkeilini_DN285_c1_g1_i1.p1    | heat-shock-protein,-putative                                |
| XP_001580655.1 | TVAG_432650 | Pkeilini_DN198613_c0_g1_i1.p1 | nitrogen-fixation-protein-nifu,-putative                    |
| XP_001580601.1 | TVAG_228780 | Pkeilini_DN501_c0_g1_i1.p1    | alcohol-dehydrogenase,-putative                             |
| XP_001580529.1 | TVAG_136740 | Pkeilini_DN184428_c0_g1_i1.p1 | RAB,-putative                                               |
| XP_001580481.1 | TVAG_136260 | Pkeilini_DN26_c5_g1_i1.p1     | GTP-binding-protein-ypt10,-putative                         |
| XP_001580416.1 | TVAG_101480 | Pkeilini_DN12181_c0_g1_i1.p1  | RAB,-putative                                               |
| XP_001580394.1 | TVAG_101260 | Pkeilini_DN13976_c0_g1_i1.p1  | Rab32,-putative                                             |
| XP_001580191.1 | TVAG_214300 | Pkeilini_DN15514_c0_g1_i1.p2  | conserved-hypothetical-protein                              |
| XP_001580148.1 | TVAG_190580 | Pkeilini_DN58662_c0_g1_i1.p1  | Clan-MG,-family-M24,-aminopeptidase-P-like-metallopeptidase |
| XP_001580142.1 | TVAG_190510 | Pkeilini_DN4576_c0_g1_i1.p1   | GTP-binding-protein-rit,-putative                           |
| XP_001580044.1 | TVAG_247370 | Pkeilini_DN184336_c0_g1_i1.p1 | conserved-hypothetical-protein                              |
| XP_001579755.1 | TVAG_268020 | Pkeilini_DN194634_c1_g1_i1.p1 | aspartate-aminotransferase,-putative                        |
| XP_001579748.1 | TVAG_267950 | Pkeilini_DN207024_c0_g1_i1.p1 | lysyl-tRNA-synthetase,-putative                             |
| XP_001579740.1 | TVAG_267870 | Pkeilini_DN269_c0_g1_i2.p1    | malic-enzyme,-putative                                      |
| XP_001579545.1 | TVAG_462450 | Pkeilini_DN676_c0_g2_i1.p1    | RAB,-putative                                               |
| XP_001579538.1 | TVAG_462370 | Pkeilini_DN14322_c0_g1_i3.p1  | Rabx19-protein,-putative                                    |

|                |             |                               |                                                       |
|----------------|-------------|-------------------------------|-------------------------------------------------------|
| XP_001579477.1 | TVAG_083440 | Pkeilini_DN112439_c0_g1_i1.p1 | conserved-hypothetical-protein                        |
| XP_001579475.1 | TVAG_083420 | Pkeilini_DN147688_c0_g2_i1.p1 | conserved-hypothetical-protein                        |
| XP_001579216.1 | TVAG_122960 | Pkeilini_DN52162_c0_g1_i1.p1  | conserved-hypothetical-protein                        |
| XP_001579154.1 | TVAG_122340 | Pkeilini_DN1085_c1_g2_i1.p1   | RAB,-putative                                         |
| XP_001579147.1 | TVAG_122270 | Pkeilini_DN3020_c0_g2_i1.p1   | RAB,-putative                                         |
| XP_001579030.1 | TVAG_113880 | Pkeilini_DN13377_c0_g1_i1.p1  | conserved-hypothetical-protein                        |
| XP_001579029.1 | TVAG_113870 | Pkeilini_DN182694_c0_g1_i1.p1 | Acetyl-CoA-hydrolase,-putative                        |
| XP_001578953.1 | TVAG_225930 | Pkeilini_DN28069_c0_g1_i1.p1  | conserved-hypothetical-protein                        |
| XP_001276882.1 | TVAG_119710 | Pkeilini_DN22730_c0_g1_i1.p1  | Clan-ME,-family-M16,-insulinase-like-metallopeptidase |
| XP_001330794.1 | TVAG_320200 | Pkeilini_DN3462_c0_g2_i1.p1   | Rab5b,-putative                                       |
| XP_001330618.1 | TVAG_054490 | Pkeilini_DN201059_c0_g1_i1.p1 | Tryptophanase,-putative                               |
| XP_001330504.1 | TVAG_383530 | Pkeilini_DN177099_c0_g1_i1.p1 | RAB,-putative                                         |
| XP_001330829.1 | TVAG_217400 | Pkeilini_DN211716_c0_g1_i1.p1 | conserved-hypothetical-protein                        |
| XP_001330450.1 | TVAG_047890 | Pkeilini_DN626_c0_g1_i1.p1    | succinate-thiokinase-a-subunit                        |
| XP_001314415.1 | TVAG_090060 | Pkeilini_DN941_c2_g4_i1.p2    | GTP-binding-protein-Rab2,-putative                    |
| XP_001330332.1 | TVAG_272760 | Pkeilini_DN218827_c0_g1_i1.p1 | glutathione-reductase,-putative                       |
| XP_001330320.1 | TVAG_217870 | Pkeilini_DN19306_c0_g1_i1.p2  | nucleotide-binding-protein,-putative                  |
| XP_001330242.1 | TVAG_325080 | Pkeilini_DN183480_c0_g1_i1.p1 | conserved-hypothetical-protein                        |
| XP_001330232.1 | TVAG_324980 | Pkeilini_DN8882_c0_g2_i2.p2   | ATP-synthase,-putative                                |
| XP_001330176.1 | TVAG_395550 | Pkeilini_DN182694_c0_g1_i1.p1 | Acetyl-CoA-hydrolase,-putative                        |

|                |             |                               |                                            |
|----------------|-------------|-------------------------------|--------------------------------------------|
| XP_001329730.1 | TVAG_454230 | Pkeilini_DN184377_c0_g1_i1.p1 | Rab15,-13,-10,-1,-35,-5,-and,-putative     |
| XP_001329309.1 | TVAG_297650 | Pkeilini_DN601_c0_g1_i1.p1    | grpe-protein,-putative                     |
| XP_001329276.1 | TVAG_297320 | Pkeilini_DN26_c4_g1_i1.p1     | small-GTPase-rabi,-putative                |
| XP_001329126.1 | TVAG_150540 | Pkeilini_DN58243_c4_g1_i1.p1  | RAB-2,4,14,-putative                       |
| XP_001329022.1 | TVAG_447580 | Pkeilini_DN69533_c0_g1_i1.p1  | conserved-hypothetical-protein             |
| XP_001328863.1 | TVAG_434770 | Pkeilini_DN1107_c0_g1_i1.p1   | Rab5b,-putative                            |
| XP_001328770.1 | TVAG_348580 | Pkeilini_DN1522_c0_g1_i1.p1   | Rabx26-protein,-putative                   |
| XP_001328523.1 | TVAG_423530 | Pkeilini_DN4238_c0_g1_i1.p2   | conserved-hypothetical-protein             |
| XP_001328415.1 | TVAG_340860 | Pkeilini_DN12251_c0_g1_i1.p2  | Rab7g-protein,-putative                    |
| XP_001328285.1 | TVAG_278280 | Pkeilini_DN26_c1_g1_i1.p2     | Rabx22-protein,-putative                   |
| XP_001328194.1 | TVAG_262210 | Pkeilini_DN172140_c0_g1_i1.p1 | tricarboxylate-transport-protein,-putative |
| XP_001328129.1 | TVAG_165340 | Pkeilini_DN626_c0_g1_i1.p1    | succinate-thiokinase-a-subunit             |
| XP_001328031.1 | TVAG_159810 | Pkeilini_DN953_c0_g5_i1.p2    | small-GTPase-RAB,-putative                 |
| XP_001328023.1 | TVAG_159730 | Pkeilini_DN206_c0_g2_i2.p1    | Rab78,-putative                            |
| XP_001327882.1 | TVAG_405730 | Pkeilini_DN7495_c0_g1_i1.p1   | Rabx37-protein,-putative                   |
| XP_001327427.1 | TVAG_201980 | Pkeilini_DN7689_c0_g1_i1.p1   | Rab15,-13,-10,-1,-35,-5,-and,-putative     |
| XP_001327371.1 | TVAG_392650 | Pkeilini_DN781_c0_g1_i1.p1    | conserved-hypothetical-protein             |
| XP_001327338.1 | TVAG_392320 | Pkeilini_DN199807_c0_g1_i1.p1 | groes-chaperonin,-putative                 |
| XP_001327242.1 | TVAG_019190 | Pkeilini_DN75143_c0_g2_i1.p1  | chaperone-protein-DNAj,-putative           |
| XP_001327227.1 | TVAG_397350 | Pkeilini_DN160922_c0_g1_i1.p1 | Rab9,-putative                             |

|                |             |                               |                                             |
|----------------|-------------|-------------------------------|---------------------------------------------|
| XP_001326968.1 | TVAG_038530 | Pkeilini_DN196128_c0_g1_i1.p1 | ornithine-carbamoyltransferase,-putative    |
| XP_001326958.1 | TVAG_038420 | Pkeilini_DN5113_c0_g1_i1.p1   | conserved-hypothetical-protein              |
| XP_001326942.1 | TVAG_038250 | Pkeilini_DN900_c0_g1_i1.p2    | Rab12,-putative                             |
| XP_001326936.1 | TVAG_038190 | Pkeilini_DN8719_c0_g1_i1.p1   | small-GTPase-rabi,-putative                 |
| XP_001326908.1 | TVAG_461020 | Pkeilini_DN3412_c0_g1_i1.p1   | ABC-transporter,-putative                   |
| XP_001326833.1 | TVAG_393370 | Pkeilini_DN196009_c0_g1_i1.p1 | Rab23,-putative                             |
| XP_001326755.1 | TVAG_388650 | Pkeilini_DN30752_c0_g1_i1.p1  | serine-palmitoyltransferase-I,-putative     |
| XP_001326629.1 | TVAG_255980 | Pkeilini_DN9830_c0_g1_i1.p1   | conserved-hypothetical-protein              |
| XP_001326421.1 | TVAG_373310 | Pkeilini_DN85431_c0_g1_i1.p1  | RAB,-putative                               |
| XP_001326329.1 | TVAG_351540 | Pkeilini_DN25815_c0_g1_i1.p1  | 2,4-dienoyl-CoA-reductase-[NADPH],-putative |
| XP_001326325.1 | TVAG_351500 | Pkeilini_DN196009_c0_g1_i1.p1 | Rab7,-putative                              |
| XP_001326307.1 | TVAG_351320 | Pkeilini_DN17_c0_g2_i1.p1     | purine-nucleoside-phosphorylase,-putative   |
| XP_001326088.1 | TVAG_044270 | Pkeilini_DN494_c1_g1_i1.p1    | RAB,-putative                               |
| XP_001326029.1 | TVAG_468220 | Pkeilini_DN13197_c0_g1_i1.p2  | conserved-hypothetical-protein              |
| XP_001325929.1 | TVAG_371800 | Pkeilini_DN80221_c1_g1_i1.p1  | conserved-hypothetical-protein              |
| XP_001325705.1 | TVAG_206500 | Pkeilini_DN3171_c0_g1_i1.p1   | Hydroxylamine-reductase,-putative           |
| XP_001325649.1 | TVAG_424580 | Pkeilini_DN175264_c0_g1_i1.p1 | mevalonate-kinase,-putative                 |
| XP_001325272.1 | TVAG_212310 | Pkeilini_DN12195_c0_g1_i1.p1  | Rabx21-protein,-putative                    |
| XP_001325171.1 | TVAG_404940 | Pkeilini_DN2224_c0_g1_i1.p1   | RAB,-putative                               |
| XP_001324855.1 | TVAG_074600 | Pkeilini_DN195601_c0_g1_i1.p1 | tyrosine-aminotransferase,-putative         |

|                |             |                               |                                                |
|----------------|-------------|-------------------------------|------------------------------------------------|
| XP_001324836.1 | TVAG_074410 | Pkeilini_DN1405_c0_g2_i1.p1   | Rabx41-protein,-putative                       |
| XP_001324773.1 | TVAG_139300 | Pkeilini_DN111_c0_g1_i1.p1    | phosphoenolpyruvate-carboxykinase,-putative    |
| XP_001324770.1 | TVAG_139270 | Pkeilini_DN26_c1_g1_i1.p2     | Rab10,-putative                                |
| XP_001324695.1 | TVAG_128860 | Pkeilini_DN211282_c0_g1_i1.p1 | RAB-18,-putative                               |
| XP_001324545.1 | TVAG_161280 | Pkeilini_DN494_c0_g3_i2.p1    | Rab32,-putative                                |
| XP_001324510.1 | TVAG_160930 | Pkeilini_DN15873_c0_g1_i1.p1  | Periplasmic-[Fe]-hydrogenase,-putative         |
| XP_001324271.1 | TVAG_038950 | Pkeilini_DN941_c0_g4_i1.p1    | Rabx3-protein,-putative                        |
| XP_001324262.1 | TVAG_038850 | Pkeilini_DN184336_c0_g1_i1.p1 | conserved-hypothetical-protein                 |
| XP_001324197.1 | TVAG_271570 | Pkeilini_DN50689_c0_g1_i1.p1  | equilibrative-nucleoside-transporter,-putative |
| XP_001324090.1 | TVAG_362470 | Pkeilini_DN7689_c0_g1_i1.p1   | Rab17,-putative                                |
| XP_001323999.1 | TVAG_106710 | Pkeilini_DN726_c0_g3_i1.p1    | conserved-hypothetical-protein                 |
| XP_001323967.1 | TVAG_106390 | Pkeilini_DN1297_c0_g1_i1.p1   | RAB-36-and,-putative                           |
| XP_001323815.1 | TVAG_081640 | Pkeilini_DN46067_c0_g1_i1.p1  | conserved-hypothetical-protein                 |
| XP_001323810.1 | TVAG_081590 | Pkeilini_DN34893_c0_g2_i1.p1  | Rab5b,-putative                                |
| XP_001323776.1 | TVAG_006280 | Pkeilini_DN9662_c1_g1_i1.p1   | RAB,-putative                                  |
| XP_001323774.1 | TVAG_006260 | Pkeilini_DN12195_c0_g3_i1.p1  | GTP-binding-protein-ypt10,-putative            |
| XP_001323750.1 | TVAG_006020 | Pkeilini_DN172145_c0_g1_i1.p1 | vacuolar-ATP-synthase-subunit-ac39,-putative   |
| XP_001323626.1 | TVAG_379850 | Pkeilini_DN1175_c2_g1_i1.p1   | Rab32,-putative                                |
| XP_001323600.1 | TVAG_379590 | Pkeilini_DN3503_c0_g1_i1.p2   | GTPase_rho,-putative                           |
| XP_001323596.1 | TVAG_379550 | Pkeilini_DN195601_c0_g1_i1.p1 | tyrosine-aminotransferase,-putative            |

|                |             |                               |                                             |
|----------------|-------------|-------------------------------|---------------------------------------------|
| XP_001323527.1 | TVAG_343980 | Pkeilini_DN164738_c0_g1_i1.p1 | conserved-hypothetical-protein              |
| XP_001323468.1 | TVAG_127520 | Pkeilini_DN407_c0_g1_i1.p1    | N-ethylmaleimide-reductase,-putative        |
| XP_001323391.1 | TVAG_498620 | Pkeilini_DN403_c0_g1_i1.p1    | ankyrin-repeat-containing-protein,-putative |
| XP_001323367.1 | TVAG_498380 | Pkeilini_DN66760_c1_g1_i1.p1  | Rab20,-putative                             |
| XP_001323255.1 | TVAG_410350 | Pkeilini_DN1857_c0_g1_i1.p2   | conserved-hypothetical-protein              |
| XP_001323219.1 | TVAG_446990 | Pkeilini_DN187988_c0_g1_i1.p1 | conserved-hypothetical-protein              |
| XP_001323218.1 | TVAG_446980 | Pkeilini_DN187988_c0_g1_i1.p1 | Rab9,-putative                              |
| XP_001323182.1 | TVAG_446610 | Pkeilini_DN2285_c0_g2_i1.p1   | small-GTPase-rabd,-putative                 |
| XP_001322993.1 | TVAG_121740 | Pkeilini_DN171252_c0_g1_i1.p1 | Rab5,-putative                              |
| XP_001322920.1 | TVAG_364210 | Pkeilini_DN14322_c0_g1_i1.p1  | Rabx37-protein,-putative                    |
| XP_001322907.1 | TVAG_157610 | Pkeilini_DN953_c0_g5_i1.p2    | rho4,-putative                              |
| XP_001322830.1 | TVAG_282070 | Pkeilini_DN497_c1_g2_i1.p1    | Rab8,-putative                              |
| XP_001322821.1 | TVAG_281980 | Pkeilini_DN197200_c0_g1_i1.p1 | centrosomal-protein-of-135-kDa,-putative    |
| XP_001322722.1 | TVAG_484100 | Pkeilini_DN953_c0_g4_i2.p1    | Rabx26-protein,-putative                    |
| XP_001322593.1 | TVAG_109540 | Pkeilini_DN41445_c0_g1_i1.p1  | serine-hydroxymethyltransferase,-putative   |
| XP_001322449.1 | TVAG_118780 | Pkeilini_DN108422_c0_g1_i1.p1 | calmodulin,-putative                        |
| XP_001322271.1 | TVAG_329350 | Pkeilini_DN7422_c1_g1_i1.p2   | Rab5,-putative                              |
| XP_001322074.1 | TVAG_259320 | Pkeilini_DN676_c0_g1_i2.p1    | Rabx18-protein,-putative                    |
| XP_001322061.1 | TVAG_259190 | Pkeilini_DN541_c0_g2_i1.p1    | succinate-thiokinase- $\gamma$ -subunit     |
| XP_001321827.1 | TVAG_056480 | Pkeilini_DN941_c2_g5_i1.p1    | ran,-putative                               |



|                |             |                               |                                                           |
|----------------|-------------|-------------------------------|-----------------------------------------------------------|
| XP_001321627.1 | TVAG_420260 | Pkeilini_DN183133_c0_g1_i1.p1 | ATP-synthase-beta-subunit,-putative                       |
| XP_001321621.1 | TVAG_420200 | Pkeilini_DN608_c0_g1_i1.p1    | conserved-hypothetical-protein                            |
| XP_001321561.1 | TVAG_395100 | Pkeilini_DN1052_c0_g1_i1.p1   | Rab17,-putative                                           |
| XP_001321469.1 | TVAG_133030 | Pkeilini_DN257_c0_g1_i1.p2    | NADH-ubiquinone-oxidoreductase-flavoprotein,-putative     |
| XP_001321321.1 | TVAG_230580 | Pkeilini_DN688_c0_g3_i1.p1    | pyruvate-flavodoxin-oxidoreductase,-putative              |
| XP_001321292.1 | TVAG_180430 | Pkeilini_DN953_c0_g2_i1.p1    | RAB-36-and,-putative                                      |
| XP_001321289.1 | TVAG_180400 | Pkeilini_DN173495_c0_g1_i1.p1 | Phospholipase-C-precursor,-putative                       |
| XP_001320926.1 | TVAG_079630 | Pkeilini_DN124701_c0_g1_i1.p1 | conserved-hypothetical-protein                            |
| XP_001320922.1 | TVAG_079570 | Pkeilini_DN211774_c0_g1_i1.p1 | Rabx19-protein,-putative                                  |
| XP_001320829.1 | TVAG_239660 | Pkeilini_DN176_c0_g1_i1.p1    | cysteine-desulfurylase,-putative                          |
| XP_001320436.1 | TVAG_308190 | Pkeilini_DN174_c0_g1_i1.p1    | ral,-putative                                             |
| XP_001320125.1 | TVAG_064490 | Pkeilini_DN235_c0_g1_i1.p1    | rubrerythrin,-putative                                    |
| XP_001319879.1 | TVAG_430220 | Pkeilini_DN3256_c0_g1_i1.p1   | RAB,-putative                                             |
| XP_001319653.1 | TVAG_419720 | Pkeilini_DN171937_c0_g1_i1.p1 | aspartate-aminotransferase,-putative                      |
| XP_001319283.1 | TVAG_311860 | Pkeilini_DN65569_c0_g2_i1.p1  | conserved-hypothetical-protein                            |
| XP_001319140.1 | TVAG_057110 | Pkeilini_DN182581_c0_g1_i1.p1 | Clan-SC,-family-S33,-methylesterase-like-serine-peptidase |
| XP_001319122.1 | TVAG_056930 | Pkeilini_DN14322_c0_g1_i1.p1  | RAB-36-and,-putative                                      |
| XP_001319084.1 | TVAG_340390 | Pkeilini_DN842_c0_g4_i1.p1    | heat-shock-protein-70-(HSP70)-4,-putative                 |
| XP_001319083.1 | TVAG_340380 | Pkeilini_DN91169_c0_g1_i2.p1  | conserved-hypothetical-protein                            |
| XP_001319074.1 | TVAG_340290 | Pkeilini_DN269_c0_g1_i2.p1    | malic-enzyme,-putative                                    |

|                |             |                               |                                                               |
|----------------|-------------|-------------------------------|---------------------------------------------------------------|
| XP_001318961.1 | TVAG_310250 | Pkeilini_DN111_c0_g1_i1.p1    | phosphoenolpyruvate-carboxykinase,-putative                   |
| XP_001318941.1 | TVAG_310050 | Pkeilini_DN13155_c3_g1_i1.p1  | nitrate,-fromate,-iron-dehydrogenase,-putative                |
| XP_001318893.1 | TVAG_211200 | Pkeilini_DN953_c0_g8_i1.p1    | Rabx21-protein,-putative                                      |
| XP_001318848.1 | TVAG_056190 | Pkeilini_DN725_c1_g1_i1.p1    | Clan-MH,-family-M20,-peptidase-T-like-metallopeptidase        |
| XP_001318715.1 | TVAG_257310 | Pkeilini_DN941_c2_g3_i1.p1    | Rab21,-putative                                               |
| XP_001318541.1 | TVAG_065750 | Pkeilini_DN104585_c0_g1_i1.p1 | sucrose-transport-protein,-putative                           |
| XP_001318394.1 | TVAG_098820 | Pkeilini_DN195601_c0_g1_i1.p1 | tyrosine-aminotransferase,-putative                           |
| XP_001318376.1 | TVAG_068130 | Pkeilini_DN269_c0_g1_i2.p1    | malic-enzyme,-putative                                        |
| XP_001317955.1 | TVAG_100550 | Pkeilini_DN144216_c0_g1_i1.p1 | glycine-cleavage-system-H-protein,-putative                   |
| XP_001317694.1 | TVAG_286490 | Pkeilini_DN3462_c4_g1_i1.p1   | RAB,-putative                                                 |
| XP_001317473.1 | TVAG_019960 | Pkeilini_DN317_c0_g2_i3.p1    | conserved-hypothetical-protein                                |
| XP_001317292.1 | TVAG_191660 | Pkeilini_DN184795_c0_g1_i1.p1 | groes-chaperonin,-putative                                    |
| XP_001317232.1 | TVAG_416520 | Pkeilini_DN1175_c2_g1_i1.p1   | RAB-18,-putative                                              |
| XP_001317174.1 | TVAG_040030 | Pkeilini_DN1216_c0_g1_i1.p1   | Iron-sulfur-flavoprotein                                      |
| XP_001317169.1 | TVAG_039980 | Pkeilini_DN108_c0_g2_i1.p3    | superoxide-dismutase,-putative                                |
| XP_001317041.1 | TVAG_226310 | Pkeilini_DN474_c2_g1_i1.p1    | conserved-hypothetical-protein                                |
| XP_001316822.1 | TVAG_233350 | Pkeilini_DN50982_c0_g1_i1.p1  | Clan-ME,-family-M16,-insulinase-like-metallopeptidase         |
| XP_001316713.1 | TVAG_453070 | Pkeilini_DN258_c0_g1_i1.p1    | Rab2,-putative                                                |
| XP_001316606.1 | TVAG_350580 | Pkeilini_DN941_c0_g1_i1.p1    | Rab21,-putative                                               |
| XP_001316281.1 | TVAG_203620 | Pkeilini_DN392_c0_g1_i1.p1    | rubisco-subunit-binding-protein-alpha-subunit,-ruba,-putative |

|                |             |                               |                                               |
|----------------|-------------|-------------------------------|-----------------------------------------------|
| XP_001316041.1 | TVAG_454570 | Pkeilini_DN1322_c0_g1_i1.p1   | Embryonic-protein-DC-8,-putative              |
| XP_001315530.1 | TVAG_193770 | Pkeilini_DN953_c0_g5_i1.p2    | RAB,-putative                                 |
| XP_001315422.1 | TVAG_049830 | Pkeilini_DN266_c0_g1_i1.p1    | disulfide-oxidoreductase,-putative            |
| XP_001315408.1 | TVAG_049690 | Pkeilini_DN217534_c0_g1_i1.p1 | thiamin-pyrophosphokinase,-putative           |
| XP_001315345.1 | TVAG_328940 | Pkeilini_DN160822_c0_g1_i1.p1 | alcohol-dehydrogenase,-putative               |
| XP_001315025.1 | TVAG_008100 | Pkeilini_DN1297_c0_g1_i1.p1   | Rabx38-protein,-putative                      |
| XP_001314995.1 | TVAG_370000 | Pkeilini_DN12195_c0_g1_i1.p1  | Rabx30-protein,-putative                      |
| XP_001314846.1 | TVAG_260830 | Pkeilini_DN5872_c0_g2_i1.p1   | conserved-hypothetical-protein                |
| XP_001314811.1 | TVAG_254890 | Pkeilini_DN688_c0_g3_i1.p1    | pyruvate-flavodoxin-oxidoreductase,-putative  |
| XP_001314747.1 | TVAG_020610 | Pkeilini_DN1975_c0_g1_i1.p2   | RAB-18,-putative                              |
| XP_001314705.1 | TVAG_055550 | Pkeilini_DN3462_c0_g1_i1.p1   | Rab8,-putative                                |
| XP_001314029.1 | TVAG_412220 | Pkeilini_DN269_c0_g1_i2.p1    | malic-enzyme,-putative                        |
| XP_001313967.1 | TVAG_442270 | Pkeilini_DN4169_c0_g1_i1.p1   | GTP-binding-protein-yptv3,-putative           |
| XP_001313958.1 | TVAG_442170 | Pkeilini_DN38635_c0_g1_i1.p1  | conserved-hypothetical-protein                |
| XP_001313802.1 | TVAG_265760 | Pkeilini_DN407_c0_g1_i1.p1    | N-ethylmaleimide-reductase,-putative          |
| XP_001313682.1 | TVAG_096630 | Pkeilini_DN217534_c0_g1_i1.p1 | thiamin-pyrophosphokinase,-putative           |
| XP_001313584.1 | TVAG_208470 | Pkeilini_DN160426_c0_g1_i1.p1 | threonyl-tRNA-synthetase,-putative            |
| XP_001313551.1 | TVAG_181000 | Pkeilini_DN206_c0_g5_i1.p1    | RAB-19,-41-and,-putative                      |
| XP_001313356.1 | TVAG_114310 | Pkeilini_DN4486_c0_g1_i1.p1   | peroxiredoxins,-prx-1,-prx-2,-prx-3,-putative |
| XP_001313153.1 | TVAG_257780 | Pkeilini_DN272_c2_g3_i1.p1    | biotin-synthase,-putative                     |

|                |             |                               |                                                    |
|----------------|-------------|-------------------------------|----------------------------------------------------|
| XP_001312991.1 | TVAG_196220 | Pkeilini_DN207877_c0_g1_i1.p1 | protein-brittle-1,-chloroplast-precursor,-putative |
| XP_001312927.1 | TVAG_029020 | Pkeilini_DN1080_c0_g1_i1.p1   | small-GTPase-rabh,-putative                        |
| XP_001312785.1 | TVAG_424920 | Pkeilini_DN66760_c1_g1_i1.p1  | RAB-3-and,-putative                                |
| XP_001312753.1 | TVAG_088050 | Pkeilini_DN392_c0_g1_i1.p1    | chaperonin,-putative                               |
| XP_001312620.1 | TVAG_468600 | Pkeilini_DN182200_c0_g1_i1.p1 | WD-repeat-protein,-putative                        |
| XP_001312469.1 | TVAG_241150 | Pkeilini_DN26_c1_g1_i1.p2     | Rabx24-protein,-putative                           |
| XP_001312254.1 | TVAG_152430 | Pkeilini_DN159673_c0_g1_i1.p1 | lysyl-tRNA-synthetase,-putative                    |
| XP_001312198.1 | TVAG_112840 | Pkeilini_DN187988_c0_g1_i1.p1 | Rabx15-protein,-putative                           |
| XP_001312168.1 | TVAG_296220 | Pkeilini_DN160340_c0_g1_i1.p1 | NADH-dehydrogenase-24-kDa-subunit,-putative        |
| XP_001312142.1 | TVAG_236570 | Pkeilini_DN4000_c0_g1_i1.p1   | Rab32,-putative                                    |
| XP_001312073.1 | TVAG_115470 | Pkeilini_DN195996_c0_g1_i1.p1 | conserved-hypothetical-protein                     |
| XP_001311960.1 | TVAG_008790 | Pkeilini_DN71584_c0_g1_i1.p1  | conserved-hypothetical-protein                     |
| XP_001311873.1 | TVAG_321030 | Pkeilini_DN195918_c0_g1_i1.p1 | conserved-hypothetical-protein                     |
| XP_001311871.1 | TVAG_321010 | Pkeilini_DN49090_c0_g2_i1.p1  | AMP-dependent-ligase/synthetase,-putative          |
| XP_001311861.1 | TVAG_242960 | Pkeilini_DN688_c0_g3_i1.p1    | pyruvate-flavodoxin-oxidoreductase,-putative       |
| XP_001311772.1 | TVAG_409800 | Pkeilini_DN207636_c0_g1_i1.p1 | RAB,-putative                                      |
| XP_001311734.1 | TVAG_479760 | Pkeilini_DN47132_c0_g1_i1.p1  | conserved-hypothetical-protein                     |
| XP_001311148.1 | TVAG_263350 | Pkeilini_DN3153_c0_g1_i1.p1   | conserved-hypothetical-protein                     |
| XP_001311109.1 | TVAG_047800 | Pkeilini_DN2125_c0_g1_i1.p1   | Rab11,-putative                                    |
| XP_001310420.1 | TVAG_335500 | Pkeilini_DN17664_c0_g1_i1.p1  | conserved-hypothetical-protein                     |
| XP_001310180.1 | TVAG_037570 | Pkeilini_DN13155_c0_g4_i1.p1  | NADH-ubiquinone-oxidoreductase,-putative           |

|                |             |                               |                                                                    |
|----------------|-------------|-------------------------------|--------------------------------------------------------------------|
| XP_001310176.1 | TVAG_037530 | Pkeilini_DN8689_c0_g1_i1.p1   | conserved-hypothetical-protein                                     |
| XP_001309934.1 | TVAG_440200 | Pkeilini_DN164467_c0_g1_i1.p1 | conserved-hypothetical-protein                                     |
| XP_001309798.1 | TVAG_390750 | Pkeilini_DN26408_c0_g3_i1.p2  | RAB-18,-putative                                                   |
| XP_001309776.1 | TVAG_470110 | Pkeilini_DN197003_c0_g1_i1.p1 | conserved-hypothetical-protein                                     |
| XP_001309717.1 | TVAG_216900 | Pkeilini_DN953_c0_g9_i1.p1    | ras,-putative                                                      |
| XP_001309656.1 | TVAG_075320 | Pkeilini_DN3946_c0_g1_i1.p2   | vacuolar-proton-ATPase,-putative                                   |
| XP_001309521.1 | TVAG_018050 | Pkeilini_DN217915_c0_g1_i1.p2 | RAB-18,-putative                                                   |
| XP_001309408.1 | TVAG_277590 | Pkeilini_DN160251_c0_g1_i1.p1 | cation-transporting-ATPase,-putative                               |
| XP_001309398.1 | TVAG_024790 | Pkeilini_DN494_c0_g1_i1.p2    | septum-promoting-GTP-binding-protein,-putative                     |
| XP_001309295.1 | TVAG_337970 | Pkeilini_DN106_c0_g1_i1.p1    | conserved-hypothetical-protein                                     |
| XP_001309218.1 | TVAG_264120 | Pkeilini_DN34504_c0_g3_i1.p1  | pecanex,-putative                                                  |
| XP_001309182.1 | TVAG_205390 | Pkeilini_DN350_c0_g1_i2.p1    | GTPase-mss1/trme,-putative                                         |
| XP_001308879.1 | TVAG_077910 | Pkeilini_DN4238_c0_g1_i1.p2   | conserved-hypothetical-protein                                     |
| XP_001308636.1 | TVAG_256470 | Pkeilini_DN217534_c0_g1_i1.p1 | thiamin-pyrophosphokinase,-putative                                |
| XP_001308553.1 | TVAG_047210 | Pkeilini_DN2207_c0_g1_i1.p1   | 2-hydroxyacid-dehydrogenase,-putative                              |
| XP_001308528.1 | TVAG_459470 | Pkeilini_DN1975_c0_g1_i1.p2   | Rab9,-putative                                                     |
| XP_001308237.1 | TVAG_032090 | Pkeilini_DN622_c0_g1_i1.p1    | Co-chaperone-protein-HscB-Hsc20,-mitochondrial-precursor,-putative |
| XP_001308201.1 | TVAG_051830 | Pkeilini_DN3462_c4_g1_i1.p1   | RAC,-putative                                                      |
| XP_001308200.1 | TVAG_051820 | Pkeilini_DN172140_c0_g1_i1.p1 | tricarboxylate-transport-protein,-putative                         |
| XP_001308167.1 | TVAG_336320 | Pkeilini_DN3171_c0_g2_i1.p1   | Hydroxylamine-reductase,-putative                                  |

|                |             |                               |                                                        |
|----------------|-------------|-------------------------------|--------------------------------------------------------|
| XP_001307912.1 | TVAG_048600 | Pkeilini_DN1721_c0_g1_i1.p1   | small-GTPase-rabi,-putative                            |
| XP_001307775.1 | TVAG_049140 | Pkeilini_DN108_c0_g2_i1.p3    | superoxide-dismutase-[fe],-putative                    |
| XP_001307690.1 | TVAG_346230 | Pkeilini_DN41178_c0_g1_i1.p2  | conserved-hypothetical-protein                         |
| XP_001307488.1 | TVAG_300910 | Pkeilini_DN199171_c0_g1_i1.p1 | Rabx18-protein,-putative                               |
| XP_001307405.1 | TVAG_458060 | Pkeilini_DN157931_c0_g2_i1.p1 | conserved-hypothetical-protein                         |
| XP_001307320.1 | TVAG_194760 | Pkeilini_DN64940_c0_g1_i1.p1  | guanine-nucleotide-exchange-factor,-putative           |
| XP_001307251.1 | TVAG_466790 | Pkeilini_DN206198_c0_g1_i1.p1 | pyruvate-flavodoxin-oxidoreductase,-putative           |
| XP_001307088.1 | TVAG_105770 | Pkeilini_DN206198_c0_g1_i1.p1 | pyruvate-flavodoxin-oxidoreductase,-putative           |
| XP_001307064.1 | TVAG_080400 | Pkeilini_DN953_c0_g10_i1.p1   | Rabx31-protein,-putative                               |
| XP_001306984.1 | TVAG_151010 | Pkeilini_DN2353_c0_g1_i3.p3   | Rabx19-protein,-putative                               |
| XP_001306776.1 | TVAG_224980 | Pkeilini_DN160002_c0_g1_i1.p1 | Clan-MH,-family-M20,-peptidase-T-like-metallopeptidase |
| XP_001306669.1 | TVAG_455090 | Pkeilini_DN4238_c0_g1_i1.p2   | conserved-hypothetical-protein                         |
| XP_001306447.1 | TVAG_132350 | Pkeilini_DN830_c0_g1_i1.p1    | conserved-hypothetical-protein                         |
| XP_001306356.1 | TVAG_104710 | Pkeilini_DN1085_c0_g1_i1.p1   | Rabx3-protein,-putative                                |
| XP_001306230.1 | TVAG_277050 | Pkeilini_DN27394_c0_g1_i1.p1  | Citrate-lyase-beta-chain,-putative                     |
| XP_001305871.1 | TVAG_489800 | Pkeilini_DN222480_c0_g1_i1.p1 | NADH-dehydrogenase-51-kDa-subunit,-putative            |
| XP_001305709.1 | TVAG_361590 | Pkeilini_DN13155_c0_g4_i1.p1  | NADH-ubiquinone-oxidoreductase,-putative               |
| XP_001305704.1 | TVAG_361540 | Pkeilini_DN419_c0_g1_i1.p2    | iron-sulfur-assembly-protein,-putative                 |
| XP_001305570.1 | TVAG_349870 | Pkeilini_DN26_c0_g1_i2.p1     | Rabx15-protein,-putative                               |
| XP_001305426.1 | TVAG_344520 | Pkeilini_DN914_c0_g1_i1.p1    | conserved-hypothetical-protein                         |

|                |             |                               |                                                                        |
|----------------|-------------|-------------------------------|------------------------------------------------------------------------|
| XP_001305403.1 | TVAG_331490 | Pkeilini_DN9662_c1_g1_i1.p1   | Rabx18-protein,-putative                                               |
| XP_001305368.1 | TVAG_327470 | Pkeilini_DN771_c0_g1_i1.p1    | alcohol-dehydrogenase,-putative                                        |
| XP_001305213.1 | TVAG_262750 | Pkeilini_DN160677_c0_g1_i1.p1 | vacuolar-ATP-synthase-subunit-H,-putative                              |
| XP_001305174.1 | TVAG_164890 | Pkeilini_DN182694_c0_g1_i1.p1 | Acetyl-CoA-hydrolase,-putative                                         |
| XP_001305114.1 | TVAG_386080 | Pkeilini_DN170837_c0_g1_i1.p1 | Clan-MG,-family-M24,-aminopeptidase-P-like-metallopeptidase            |
| XP_001305092.1 | TVAG_383350 | Pkeilini_DN196009_c0_g1_i1.p1 | RAB-2,4,14,-putative                                                   |
| XP_001304655.1 | TVAG_384490 | Pkeilini_DN429_c0_g1_i1.p1    | Rab9,-putative                                                         |
| XP_001304618.1 | TVAG_092740 | Pkeilini_DN219560_c0_g1_i1.p1 | small-GTPase-rabi,-putative                                            |
| XP_001304246.1 | TVAG_065320 | Pkeilini_DN2353_c0_g1_i3.p3   | Rab21,-putative                                                        |
| XP_001304133.1 | TVAG_220970 | Pkeilini_DN16958_c0_g1_i1.p2  | RAB,-putative                                                          |
| XP_001304067.1 | TVAG_147840 | Pkeilini_DN210433_c0_g1_i1.p1 | Rab21,-putative                                                        |
| XP_001304062.1 | TVAG_147790 | Pkeilini_DN6516_c0_g2_i1.p1   | cysteine/methionine-metabolism-pyridoxal-5-phosphate-enzymes,-putative |
| XP_001303981.1 | TVAG_144730 | Pkeilini_DN541_c0_g1_i1.p1    | succinate-thiokinase- $\zeta$ -subunit                                 |
| XP_001303783.1 | TVAG_445730 | Pkeilini_DN199807_c0_g1_i1.p1 | groes-chaperonin,-putative                                             |
| XP_001303674.1 | TVAG_092170 | Pkeilini_DN1127_c0_g1_i1.p1   | preprotein-translocase-secy-subunit,-putative                          |
| XP_001303658.1 | TVAG_134510 | Pkeilini_DN219911_c0_g1_i1.p1 | RAB-18,-putative                                                       |
| XP_001303641.1 | TVAG_328110 | Pkeilini_DN26_c0_g1_i2.p1     | RAB-18,-putative                                                       |
| XP_001303632.1 | TVAG_152690 | Pkeilini_DN407_c0_g1_i1.p1    | N-ethylmaleimide-reductase,-putative                                   |
| XP_001303268.1 | TVAG_385350 | Pkeilini_DN183936_c0_g1_i1.p1 | thioredoxin,-putative                                                  |
| XP_001303252.1 | TVAG_234150 | Pkeilini_DN109943_c0_g1_i1.p1 | conserved-hypothetical-protein                                         |

|                |             |                               |                                                                    |
|----------------|-------------|-------------------------------|--------------------------------------------------------------------|
| XP_001303146.1 | TVAG_415960 | Pkeilini_DN3256_c0_g1_i1.p1   | Rab9,-putative                                                     |
| XP_001303059.1 | TVAG_088220 | Pkeilini_DN195601_c0_g1_i1.p1 | aspartate-aminotransferase,-putative                               |
| XP_001302997.1 | TVAG_371280 | Pkeilini_DN12181_c0_g1_i1.p1  | Rab2,-putative                                                     |
| XP_001302917.1 | TVAG_124590 | Pkeilini_DN4394_c0_g1_i1.p1   | Rab6,-putative                                                     |
| XP_001302913.1 | TVAG_124540 | Pkeilini_DN158973_c0_g1_i1.p1 | GTPase_rho,-putative                                               |
| XP_001302832.1 | TVAG_320300 | Pkeilini_DN184375_c0_g1_i1.p1 | GTP-binding-protein-Rab2,-putative                                 |
| XP_001302560.1 | TVAG_386000 | Pkeilini_DN159371_c0_g1_i1.p1 | Receptor-expression-enhancing-protein,-putative                    |
| XP_001302496.1 | TVAG_356810 | Pkeilini_DN144134_c0_g2_i1.p1 | NimA-like-protein                                                  |
| XP_001302364.1 | TVAG_327760 | Pkeilini_DN1216_c0_g1_i1.p1   | Iron-sulfur-flavoprotein                                           |
| XP_001302013.1 | TVAG_261280 | Pkeilini_DN2117_c0_g1_i1.p1   | GTP-binding-protein-ypt11,-putative                                |
| XP_001301760.1 | TVAG_025980 | Pkeilini_DN11926_c1_g1_i2.p1  | glutamate-dehydrogenase,-putative                                  |
| XP_001301244.1 | TVAG_158270 | Pkeilini_DN222101_c0_g1_i1.p1 | RAB,-putative                                                      |
| XP_001301100.1 | TVAG_041340 | Pkeilini_DN199807_c0_g1_i1.p1 | groes-chaperonin,-putative                                         |
| XP_001301044.1 | TVAG_422690 | Pkeilini_DN1052_c0_g1_i1.p1   | Rab9,-putative                                                     |
| XP_001301038.1 | TVAG_422630 | Pkeilini_DN622_c0_g1_i1.p1    | Co-chaperone-protein-HscB-Hsc20,-mitochondrial-precursor,-putative |
| XP_001300804.1 | TVAG_293370 | Pkeilini_DN207058_c0_g1_i1.p1 | nucleoside-diphosphate-kinase,-putative                            |
| XP_001300601.1 | TVAG_001130 | Pkeilini_DN53254_c0_g1_i1.p1  | conserved-hypothetical-protein                                     |
| XP_001300482.1 | TVAG_318670 | Pkeilini_DN626_c0_g1_i1.p1    | succinate-thiokinase-a-subunit                                     |
| XP_001300294.1 | TVAG_015270 | Pkeilini_DN6278_c0_g1_i2.p2   | small-GTPase-rabh,-putative                                        |
| XP_001300248.1 | TVAG_169740 | Pkeilini_DN219911_c0_g1_i1.p1 | RAB-19,-41-and,-putative                                           |



|                    |             |                               |                                                 |
|--------------------|-------------|-------------------------------|-------------------------------------------------|
| XP_001299687.<br>1 | TVAG_440690 | Pkeilini_DN26_c4_g1_i1.p1     | small-GTPase-rabh,-putative                     |
| XP_001299604.<br>1 | TVAG_527180 | Pkeilini_DN327_c2_g1_i1.p1    | RAB,-putative                                   |
| XP_001299513.<br>1 | TVAG_177600 | Pkeilini_DN183618_c0_g1_i1.p1 | glycine-cleavage-system-H-protein<br>,-putative |
| XP_001299483.<br>1 | TVAG_450220 | Pkeilini_DN96108_c0_g1_i1.p1  | conserved-hypothetical-protein                  |
| XP_001299482.<br>1 | TVAG_399860 | Pkeilini_DN71456_c0_g1_i1.p1  | Ferredoxin-2                                    |
| XP_001299372.<br>1 | TVAG_499340 | Pkeilini_DN497_c1_g1_i1.p1    | hypothetical-protein                            |
| XP_001299219.<br>1 | TVAG_528800 | Pkeilini_DN3462_c4_g1_i1.p1   | RAB-2,4,14,-putative                            |
| XP_001299204.<br>1 | TVAG_450060 | Pkeilini_DN13377_c0_g1_i1.p1  | conserved-hypothetical-protein                  |
| XP_001298987.<br>1 | TVAG_126970 | Pkeilini_DN207052_c0_g1_i1.p1 | RAB-GDP-dissociation-inhibitor,-p<br>utative    |
| XP_001298262.<br>1 | TVAG_022530 | Pkeilini_DN30686_c0_g1_i1.p1  | conserved-hypothetical-protein                  |
| XP_001297863.<br>1 | TVAG_377380 | Pkeilini_DN1554_c0_g1_i1.p1   | conserved-hypothetical-protein                  |
| XP_001297704.<br>1 | TVAG_085320 | Pkeilini_DN2659_c0_g1_i1.p1   | small-GTPase-rabi,-putative                     |
| XP_001297366.<br>1 | TVAG_530140 | Pkeilini_DN160991_c0_g1_i1.p1 | conserved-hypothetical-protein                  |
| XP_001297292.<br>1 | TVAG_504530 | Pkeilini_DN211774_c0_g1_i1.p1 | Rabx26-protein,-putative                        |
| XP_001296818.<br>1 | TVAG_060820 | Pkeilini_DN1085_c1_g1_i1.p1   | RAB,-putative                                   |
| XP_001296212.<br>1 | TVAG_082020 | Pkeilini_DN159740_c0_g1_i1.p1 | conserved-hypothetical-protein                  |
| XP_001294582.<br>1 | TVAG_547520 | Pkeilini_DN218014_c0_g1_i1.p1 | threonine-synthase,-putative                    |
| XP_001294517.<br>1 | TVAG_416100 | Pkeilini_DN568_c0_g1_i1.p1    | malic-enzyme,-putative                          |

**Table S5: List of annotated genes gained in the trichomonas lineage after the split from their common ancestor with *P. keilini***

| Gene family | Annotation                                  | <i>T. vaginalis</i> gene ID | KEGG_ko                       |
|-------------|---------------------------------------------|-----------------------------|-------------------------------|
| OG_792      | Acetyltransf_1                              | TvagiEBg036290              | ko:K20793                     |
| OG_5491     | Acetyltransf_1,Pkinase,TPR_8                | TvagiEBg053982              | ko:K04345                     |
| OG_24374    | biological adhesion                         | TvagiEBg038277              | NA                            |
| OG_24315    | biological adhesion                         | TvagiEBg036641              | ko:K10402                     |
| OG_6750     | biological adhesion                         | TvagiEBg023227              | NA                            |
| OG_7081     | biological adhesion                         | TvagiEBg023531              | NA                            |
| OG_7139     | biological adhesion                         | TvagiEBg055182              | ko:K14000                     |
| OG_7120     | biological adhesion                         | TvagiEBg043549              | NA                            |
| OG_16843    | biological adhesion                         | TvagiEBg047580              | NA                            |
| OG_16996    | biological adhesion                         | TvagiEBg036104              | ko:K14000                     |
| OG_17311    | biological adhesion                         | TvagiEBg041328              | ko:K15152                     |
| OG_170      | cAMP-dependent protein kinase activity      | TvagiEBg039290              | ko:K04345,ko:K10409,ko:K19584 |
| OG_1811     | Chromo,DUF4208,Helicase_C,PHD,SNF2_N        | TvagiEBg028330              | ko:K11367                     |
| OG_2044     | DNA polymerase type B, organellar and viral | TvagiEBg047836              | NA                            |
| OG_3706     | twin BRCT domain                            | TvagiEBg028318              | ko:K10728                     |

|          |                                                                       |                                                             |                               |
|----------|-----------------------------------------------------------------------|-------------------------------------------------------------|-------------------------------|
| OG_2184  | endoplasmic reticulum-plasma membrane tethering                       | TvagiEBg028132                                              | ko:K12486,ko:K19938           |
| OG_3706  | twin BRCT domain                                                      | TvagiEBg028318                                              | ko:K10728                     |
| OG_1726  | spectrin binding                                                      | TvagiEBg042842,TvagiEBg055069                               | ko:K15502,ko:K15503           |
| OG_6482  | Glycine rich protein                                                  | TvagiEBg030396                                              | NA                            |
| OG_6775  | GTPase activity                                                       | TvagiEBg034972                                              | NA                            |
| OG_6405  | GTPase activity                                                       | TvagiEBg041930                                              | NA                            |
| OG_2058  | islet amyloid polypeptide processing                                  | TvagiEBg048541,TvagiEBg048542                               | ko:K01341,ko:K01360,ko:K08673 |
| OG_1775  | Exhibits S-adenosyl-L-methionine-dependent methyltransferase activity | TvagiEBg025243                                              | NA                            |
| OG_2007  | MyD88-dependent toll-like receptor signaling pathway                  | TvagiEBg044672,TvagiEBg044653                               | ko:K18809                     |
| OG_5666  | Myb-like DNA-binding domain                                           | TvagiEBg022475,TvagiEBg041712,TvagiEBg055335,TvagiEBg046332 | ko:K09422                     |
| OG_16767 | nerve growth factor signaling pathway                                 | TvagiEBg056182                                              | ko:K15503,ko:K21440           |
| OG_6132  | nuclear import signal receptor activity                               | TvagiEBg055732                                              | NA                            |
| OG_24385 | PDZ domain binding                                                    | TvagiEBg057545                                              | ko:K16072,ko:K19878,ko:K20478 |
| OG_1974  | Phage tail repeat like                                                | TvagiEBg019118                                              | NA                            |

|          |                                          |                                                                                                                                        |                                                             |
|----------|------------------------------------------|----------------------------------------------------------------------------------------------------------------------------------------|-------------------------------------------------------------|
| OG_24226 | spectrin binding                         | TvagiEBg046228                                                                                                                         | NA                                                          |
| OG_5955  | protein kinase activity                  | TvagiEBg050562,TvagiEBg050583                                                                                                          | ko:K04345                                                   |
| OG_5921  | protein serine/threonine kinase activity | TvagiEBg025205,TvagiEBg054198,TvagiEBg046872                                                                                           | NA                                                          |
| OG_1756  | protein serine/threonine kinase activity | TvagiEBg023811,TvagiEBg041668                                                                                                          | ko:K02216                                                   |
| OG_1026  | protein serine/threonine kinase activity | TvagiEBg028031,TvagiEBg049667                                                                                                          | ko:K08813,ko:K16312                                         |
| OG_4577  | protein serine/threonine kinase activity | TvagiEBg038832,TvagiEBg048970                                                                                                          | ko:K04428,ko:K17533,ko:K08798                               |
| OG_6690  | protein serine/threonine kinase activity | TvagiEBg056404                                                                                                                         | ko:K08857,ko:K20879                                         |
| OG_24246 | protein ubiquitination                   | TvagiEBg000145                                                                                                                         | NA                                                          |
| OG_24247 | protein ubiquitination                   | TvagiEBg033567,TvagiEBg035052                                                                                                          | ko:K20129,ko:K15502,ko:K15503                               |
| OG_1735  | protein ubiquitination                   | TvagiEBg021138,TvagiEBg024708,TvagiEBg012479,TvagiEBg001122,TvagiEBg001731,TvagiEBg006733,TvagiEBg000512,TvagiEBg008998,TvagiEBg002326 | ko:K10325,ko:K12591                                         |
| OG_6128  | protein ubiquitination                   | TvagiEBg049297,TvagiEBg043655                                                                                                          | NA                                                          |
| OG_16927 | protein ubiquitination                   | TvagiEBg039035                                                                                                                         | ko:K15502,ko:K15503,ko:K20032,ko:K21440                     |
| OG_2368  | protein serine/threonine kinase activity | TvagiEBg032765,TvagiEBg047551,TvagiEBg016996,TvagiEBg058648,TvagiEBg059205,TvagiEBg052716                                              | ko:K04345,ko:K07376,ko:K13302,ko:K13303                     |
| OG_7079  | regulation of centriole replication      | TvagiEBg021289                                                                                                                         | ko:K06631,ko:K07298,ko:K08269,ko:K08850,ko:K13412,ko:K21358 |

|          |                                                               |                                                                                                                                                       |                               |
|----------|---------------------------------------------------------------|-------------------------------------------------------------------------------------------------------------------------------------------------------|-------------------------------|
| OG_6445  | regulation of choline O-acetyltransferase activity            | TvagiEBg049095,TvagiEBg050875                                                                                                                         | ko:K01404,ko:K08654,ko:K12813 |
| OG_4922  | Reprolysin_4                                                  | TvagiEBg044791,TvagiEBg044795,TvagiEBg050876                                                                                                          | NA                            |
| OG_19677 | Reversible hydration of carbon dioxide                        | TvagiEBg041073,TvagiEBg054911                                                                                                                         | ko:K01673                     |
| OG_5952  | Ribonuclease H protein                                        | TvagiEBg028675,TvagiEBg029501,TvagiEBg028461,TvagiEBg038876,TvagiEBg037831,TvagiEBg030542,TvagiEBg040960,TvagiEBg032543,TvagiEBg027125                | ko:K12879                     |
| OG_18737 | Ribosomal L29e protein family rpl29                           | TvagiEBg037733,TvagiEBg034570.TvagiEBg047046                                                                                                          | ko:K02905                     |
| OG_1071  | Right handed beta helix region                                | TvagiEBg032352,TvagiEBg045961,TvagiEBg045962,TvagiEBg020968,TvagiEBg028656,TvagiEBg002344,TvagiEBg017538,TvagiEBg051902,TvagiEBg052658,TvagiEBg055958 | NA                            |
| OG_19828 | RNA polymerase I core binding                                 | TvagiEBg026015                                                                                                                                        | ko:K11294                     |
| OG_24227 | RNA polymerase II transcription regulator recruiting activity | TvagiEBg000087,TvagiEBg054872,TvagiEBg058883                                                                                                          | NA                            |
| OG_6053  | RNA binding                                                   | TvagiEBg023316                                                                                                                                        | ko:K13154                     |
| OG_19443 | sensory perception of sound                                   | TvagiEBg028625,TvagiEBg051265                                                                                                                         | ko:K05747                     |
| OG_1990  | serine-type endopeptidase activity                            | TvagiEBg052350,TvagiEBg052355,TvagiEBg052562,TvagiEBg052386,TvagiEBg052378                                                                            | NA                            |
| OG_24486 | spectrin binding                                              | TvagiEBg054770                                                                                                                                        | NA                            |

|          |                                                   |                                                                                                                                                                                                                                                                                              |                                         |
|----------|---------------------------------------------------|----------------------------------------------------------------------------------------------------------------------------------------------------------------------------------------------------------------------------------------------------------------------------------------------|-----------------------------------------|
| OG_1846  | spectrin binding                                  | TvagiEBg037450,TvagiEBg037444,TvagiEBg037452,TvagiEBg030906,TvagiEBg037447,TvagiEBg059166,TvagiEBg032170,TvagiEBg028616,TvagiEBg027013                                                                                                                                                       | ko:K15502,ko:K15503                     |
| OG_124   | spectrin binding,protein ubiquitination           | TvagiEBg036895,TvagiEBg039181,TvagiEBg056857,TvagiEBg058173,TvagiEBg051128,TvagiEBg025287,TvagiEBg039180,TvagiEBg025285,TvagiEBg025286,TvagiEBg046793,TvagiEBg045177,TvagiEBg055607,TvagiEBg059132,TvagiEBg049319                                                                            | ko:K15502,ko:K15503,ko:K20032,ko:K21440 |
| OG_1726  | spectrin binding                                  | TvagiEBg042842,TvagiEBg055069                                                                                                                                                                                                                                                                | ko:K15502,ko:K15503                     |
| OG_6626  | spectrin binding                                  | TvagiEBg031656                                                                                                                                                                                                                                                                               | NA                                      |
| OG_7116  | spectrin binding                                  | TvagiEBg041913                                                                                                                                                                                                                                                                               | NA                                      |
| OG_17052 | spectrin binding                                  | TvagiEBg045359                                                                                                                                                                                                                                                                               | ko:K10380                               |
| OG_2826  | Sulfatase                                         | TvagiEBg043468,TvagiEBg056542,TvagiEBg038218,TvagiEBg049604,TvagiEBg020034,TvagiEBg037070,TvagiEBg040806,TvagiEBg056543,TvagiEBg039040,TvagiEBg044578,TvagiEBg019289,TvagiEBg044686,TvagiEBg051277,TvagiEBg050423,TvagiEBg040807,TvagiEBg049450,TvagiEBg015897,TvagiEBg021826,TvagiEBg019340 | NA                                      |
| OG_5283  | thiosulfate sulfurtransferase activity            | TvagiEBg056003                                                                                                                                                                                                                                                                               | ko:K01011                               |
| OG_701   | thiomorpholine-carboxylate dehydrogenase activity | TvagiEBg027824,TvagiEBg042806                                                                                                                                                                                                                                                                | ko:K01750,ko:K18258                     |

|         |                                                |                                                                                                                                                                      |           |
|---------|------------------------------------------------|----------------------------------------------------------------------------------------------------------------------------------------------------------------------|-----------|
| OG_218  | trehalase (brush-border membrane glycoprotein) | TvagiEBg044074,TvagiEBg044075                                                                                                                                        | ko:K01194 |
| OG_2106 | unfolded protein binding, ATP binding          | TvagiEBg052412,TvagiEBg036462,TvagiEBg045708,TvagiEBg056047,TvagiEBg055070,TvagiEBg023823,TvagiEBg038251,TvagiEBg052522,TvagiEBg022564,TvagiEBg052488,TvagiEBg052411 | ko:K04043 |

## *P. keilini* hydrogenosomal preprotein import system is similar to other hydrogenosomes

Import into the hydrogenosome requires transport across two plasma membranes, in canonical mitochondrial organisms the inner and outer membranes have evolutionarily unrelated translocase complexes, which contain a core translocase and accessory components which assist in preprotein import. The Translocase of the Outer Membrane (TOM) complex has an essential conserved translocase, TOM40, and orthologs have been functionally characterised as the preprotein translocases in isolated hydrogenosomes (Makki et al., 2019). Characteristic of these proteins is a beta-barrel fold of the pfam hmm family [Porin\\_3](#), the number of paralogs of this protein varies from lineage to lineage in excavates with kinetoplastids such as *T. brucei* having two copies of a highly diverged protein termed ATOM (Pusnik et al., 2011), and *T. vaginalis* as many as six (Rada et al., 2011). We identified two partial sequences in *P. keilini* (Pfam Porin\_3, E-value  $1.1 \times 10^{-6}$ ,  $2.3 \times 10^{-5}$ ). Whilst neither sequence is complete, both have beta barrel topology similar to translocases identified in *T. vaginalis* by PRED\_TMBB (Bagos et al., 2004). In most eukaryotes the TOM complex has accessory proteins which assist in preprotein import and binding, these subunits seem to have independently emerged in different eukaryotic lineages though are assumedly functionally similar. Several accessory proteins have been identified to the *T. brucei* TOM complex (Schneider, 2018), though appear absent in the *T. vaginalis* (Makki et al., 2019). No strong homologs to the accessory proteins from the yeast system are present in *P. keilini* nor ATOM11, 12, 14, 46, 69 of the *T. brucei* TOM complex.

Preproteins destined for insertion into the outer membrane are handled subsequent to Tom40 import by another bacterially evolved beta barrel protein SAM50 which is the core translocase of the SAM complex (Kozjak et al., 2003). We did not detect SAM50 in *P. keilini*.

In contrast to the ancestrally bacterial beta barrel translocases of the outer membrane, import through and insertion into the inner membrane is facilitated by proteins of eukaryotic innovation termed Translocase of the Inner Membrane (TIM) complexes. In many eukaryotes

the inner membrane translocases have functionally diverged to do slightly different tasks, in yeast three related proteins Tim17, 22, 23 form the core translocases to two different complexes the Tim22 complex mediating the insertion of membrane proteins and Tim23 for lumen destined proteins. In *P. keilini* two proteins were identified with homology to the inner membrane TIM 17 family (Pfam Tim17, E-values  $3.3 \times 10^{-8}$ ,  $4.6 \times 10^{-8}$ ), this compares to the 4 identified in *T. vaginalis* where it is not yet clear whether they form functionally discrete complexes (Rada et al., 2011). Like the outer membrane, the translocase complexes of the inner membrane have accessory subunits which assist in preprotein import, the most significant of these the Presequence translocase-Associated Motor (PAM) which involves both matrix and membrane associated proteins. The membrane associating components, Tim44 Pam16 (Pfam Pam16, E-value  $8.4 \times 10^{-5}$ ), and Pam18 were all found in *P. keilini* as well as the matrix proteins Mge1 and mtHSP70. The PAM motor has also been characterised in *T. vaginalis* (Rada et al., 2011) and is similarly complete. Some imported preproteins undergo signal sequence cleavage with a specific Mitochondrial Processing Protease (MPP). In many eukaryotes the MPP is composed of evolutionarily related  $\alpha/\beta$  subunits, but other organisms including *T. vaginalis* have undergone streamlining to a single subunit (Šmíd et al., 2008). In our dataset we find only a single MPP type protease, suggesting that the reductive evolution of this complex occurred before the speciation of *P. keilini*.

In summary the *P. keilini* hydrogenosome retains the core translocases of the inner and outer membranes, and closely resembles the architecture of the *Trichomonas* hydrogenosome, with complete PAM and a single MPP, but without other accessory proteins. The copy number of the core translocases is lower than that of *T. vaginalis*. Particularly interesting in this respect are the two Tim17 family proteins, which would suggest that the scope for functional diversity of the TIM complexes is limited to those two proteins and could be another example of a reductive evolution in the preprotein import system.

## Supplementary references

- Bagos, P. G., Liakopoulos, T. D., Spyropoulos, I. C., & Hamodrakas, S. J. (2004). PRED-TMBB: a web server for predicting the topology of beta-barrel outer membrane proteins. *Nucleic Acids Research*, 32(suppl\_2), W400–W404.
- Barratt, J. L., Cao, M., Stark, D. J., & Ellis, J. T. (2015). The transcriptome sequence of *Dientamoeba fragilis* offers new biological insights on its metabolism, kinome, degradome and potential mechanisms of pathogenicity. *Protist*, 166(4), 389–408.
- Buchfink, B., Xie, C., & Huson, D. H. (2015). Fast and sensitive protein alignment using



- DIAMOND. *Nature Methods*, 12(1), 59–60. <https://doi.org/10.1038/nmeth.3176>
- Criscuolo, A., & Gribaldo, S. (2010). BMGE (Block Mapping and Gathering with Entropy): A new software for selection of phylogenetic informative regions from multiple sequence alignments. *BMC Evolutionary Biology*, 10(1), 210. <https://doi.org/10.1186/1471-2148-10-210>
- Csűös, M. (2010). Count: Evolutionary analysis of phylogenetic profiles with parsimony and likelihood. *Bioinformatics*, 26(15), 1910–1912. <https://doi.org/10.1093/bioinformatics/btq315>
- Derelle, R., Philippe, H., & Colbourne, J. K. (2020). Broccoli: Combining Phylogenetic and Network Analyses for Orthology Assignment. *Molecular Biology and Evolution*, 37(11), 3389–3396. <https://doi.org/10.1093/molbev/msaa159>
- Dobell, C., & Laidlaw, P. P. (1926). On the Cultivation of *Entamoeba histolytica* and some other Entozoic Amoebae. *Parasitology*, 18(3), 283–318. <https://doi.org/10.1017/S0031182000005278>
- Durbin, R., Eddy, S. R., Krogh, A., & Mitchison, G. J. (1998). *Biological Sequence Analysis: Probabilistic Models of Proteins and Nucleic Acids*. <https://doi.org/10.1017/CBO9780511790492>
- Eddy, S. R. (1998). Profile hidden Markov models. *Bioinformatics*, 14(9), 755–763. <https://doi.org/10.1093/bioinformatics/14.9.755>
- Handrich, M. R., Garg, S. G., Sommerville, E. W., Hirt, R. P., & Gould, S. B. (2019). Characterization of the BspA and Pmp protein family of trichomonads. *Parasites & Vectors*, 12, 1–15.
- Huerta-Cepas, J., Forslund, K., Coelho, L. P., Szklarczyk, D., Jensen, L. J., von Mering, C., & Bork, P. (2017). Fast Genome-Wide Functional Annotation through Orthology Assignment by eggNOG-Mapper. *Molecular Biology and Evolution*, 34(8), 2115–2122. <https://doi.org/10.1093/molbev/msx148>

- Huerta-Cepas, J., Szklarczyk, D., Forslund, K., Cook, H., Heller, D., Walter, M. C., Rattei, T., Mende, D. R., Sunagawa, S., Kuhn, M., Jensen, L. J., von Mering, C., & Bork, P. (2016). eggNOG 4.5: A hierarchical orthology framework with improved functional annotations for eukaryotic, prokaryotic and viral sequences. *Nucleic Acids Research*, *44*(Database issue), D286–D293. <https://doi.org/10.1093/nar/gkv1248>
- Huerta-Cepas, J., Szklarczyk, D., Heller, D., Hernández-Plaza, A., Forslund, S. K., Cook, H., Mende, D. R., Letunic, I., Rattei, T., Jensen, L. J., von Mering, C., & Bork, P. (2019). eggNOG 5.0: A hierarchical, functionally and phylogenetically annotated orthology resource based on 5090 organisms and 2502 viruses. *Nucleic Acids Research*, *47*(D1), D309–D314. <https://doi.org/10.1093/nar/gky1085>
- Kalyaanamoorthy, S., Minh, B. Q., Wong, T. K. F., von Haeseler, A., & Jermiin, L. S. (2017). ModelFinder: Fast model selection for accurate phylogenetic estimates. *Nature Methods*, *14*(6), 587–589. <https://doi.org/10.1038/nmeth.4285>
- Kanehisa, M., Furumichi, M., Tanabe, M., Sato, Y., & Morishima, K. (2017). KEGG: New perspectives on genomes, pathways, diseases and drugs. *Nucleic Acids Research*, *45*(D1), D353–D361. <https://doi.org/10.1093/nar/gkw1092>
- Kanehisa, M., & Goto, S. (2000). KEGG: Kyoto Encyclopedia of Genes and Genomes. *Nucleic Acids Research*, *28*(1), 27–30.
- Kanehisa, M., Sato, Y., & Morishima, K. (2016). BlastKOALA and GhostKOALA: KEGG Tools for Functional Characterization of Genome and Metagenome Sequences. *Journal of Molecular Biology*, *428*(4), 726–731. <https://doi.org/10.1016/j.jmb.2015.11.006>
- Katoh, K., & Standley, D. M. (2013). MAFFT Multiple Sequence Alignment Software Version 7: Improvements in Performance and Usability. *Molecular Biology and Evolution*, *30*(4), 772–780. <https://doi.org/10.1093/molbev/mst010>
- Kozjak, V., Wiedemann, N., Milenkovic, D., Lohaus, C., Meyer, H. E., Guiard, B., Meisinger, C., & Pfanner, N. (2003). An essential role of Sam50 in the protein sorting and assembly

- machinery of the mitochondrial outer membrane. *Journal of Biological Chemistry*, 278(49), 48520–48523.
- Krogh, A., Brown, M., Mian, I. S., Sjölander, K., & Haussler, D. (1994). Hidden Markov Models in Computational Biology: Applications to Protein Modeling. *Journal of Molecular Biology*, 235(5), 1501–1531. <https://doi.org/10.1006/jmbi.1994.1104>
- Makki, A., Rada, P., Žárský, V., Kereche, S., Kováčik, L., Novotný, M., Jores, T., Rapaport, D., & Tachezy, J. (2019). Triplet-pore structure of a highly divergent TOM complex of hydrogenosomes in *Trichomonas vaginalis*. *PLoS Biology*, 17(1), e3000098.
- Minh, B. Q., Schmidt, H. A., Chernomor, O., Schrempf, D., Woodhams, M. D., Von Haeseler, A., & Lanfear, R. (2020). IQ-TREE 2: New models and efficient methods for phylogenetic inference in the genomic era. *Molecular Biology and Evolution*, 37(5), 1530–1534.
- Morel, B., Schade, P., Lutteropp, S., Williams, T. A., Szöllősi, G. J., & Stamatakis, A. (2022). SpeciesRax: A Tool for Maximum Likelihood Species Tree Inference from Gene Family Trees under Duplication, Transfer, and Loss. *Molecular Biology and Evolution*, 39(2), msab365. <https://doi.org/10.1093/molbev/msab365>
- Morin-Adeline, V., Lomas, R., O'Meally, D., Stack, C., Conesa, A., & Šlapeta, J. (2014). Comparative transcriptomics reveals striking similarities between the bovine and feline isolates of *Tritrichomonas foetus*: Consequences for in silico drug-target identification. *BMC Genomics*, 15, 1–18.
- Nguyen, L.-T., Schmidt, H. A., von Haeseler, A., & Minh, B. Q. (2015). IQ-TREE: A Fast and Effective Stochastic Algorithm for Estimating Maximum-Likelihood Phylogenies. *Molecular Biology and Evolution*, 32(1), 268–274. <https://doi.org/10.1093/molbev/msu300>
- Nie, D. (1950). Morphology and taxonomy of the intestinal protozoa of the guinea-pig, *cavia porcella*. *Journal of Morphology*, 86(3), 381–493. <https://doi.org/10.1002/jmor.1050860302>

- Nishimura, Y., Otagiri, M., Yuki, M., Shimizu, M., Inoue, J., Moriya, S., & Ohkuma, M. (2020). Division of functional roles for termite gut protists revealed by single-cell transcriptomes. *The ISME Journal*, *14*(10), 2449–2460.
- Pusnik, M., Schmidt, O., Perry, A. J., Oeljeklaus, S., Niemann, M., Warscheid, B., Lithgow, T., Meisinger, C., & Schneider, A. (2011). Mitochondrial preprotein translocase of trypanosomatids has a bacterial origin. *Current Biology*, *21*(20), 1738–1743.
- Rada, P., Doležal, P., Jedelský, P. L., Bursac, D., Perry, A. J., Šedinová, M., Smíšková, K., Novotný, M., Beltrán, N. C., Hrdý, I., & others. (2011). The core components of organelle biogenesis and membrane transport in the hydrogenosomes of *Trichomonas vaginalis*. *PloS One*, *6*(9).
- Schneider, A. (2018). Mitochondrial protein import in trypanosomatids: Variations on a theme or fundamentally different? *PLoS Pathogens*, *14*(11).
- Šmíd, O., Matušková, A., Harris, S. R., Kučera, T., Novotný, M., Horváthová, L., Hrdý, I., Kutějová, E., Hirt, R. P., Embley, T. M., Janata, J., & Tachezy, J. (2008). Reductive Evolution of the Mitochondrial Processing Peptidases of the Unicellular Parasites *Trichomonas vaginalis* and *Giardia intestinalis*. *PLOS Pathogens*, *4*(12), e1000243. <https://doi.org/10.1371/journal.ppat.1000243>
- Stairs, C. W., Leger, M. M., & Roger, A. J. (2015). Diversity and origins of anaerobic metabolism in mitochondria and related organelles. *Philosophical Transactions of the Royal Society B: Biological Sciences*, *370*(1678), 20140326. <https://doi.org/10.1098/rstb.2014.0326>
- Stairs, C. W., Táborský, P., Salomaki, E. D., Kolisko, M., Pánek, T., Eme, L., Hradilová, M., Vlček, Č., Jerlström-Hultqvist, J., Roger, A. J., & Čepička, I. (2021). Anaeramoebae are a divergent lineage of eukaryotes that shed light on the transition from anaerobic mitochondria to hydrogenosomes. *Current Biology*, *31*(24), 5605-5612.e5. <https://doi.org/10.1016/j.cub.2021.10.010>
- Tanifuji, G., Takabayashi, S., Kume, K., Takagi, M., Nakayama, T., Kamikawa, R., Inagaki, Y., &

Hashimoto, T. (2018). The draft genome of *Kipferlia bialata* reveals reductive genome evolution in fornicate parasites. *PLoS One*, 13(3), e0194487.
